# Supplementary material for: Iridium-catalyzed asymmetric cascade allylation/lactonization of methyl salicylates: enantioselective construction of chiral benzodioxepinones
Source: Royal Society of Chemistry journal article supplement (doi:10.1039/d4qo01771d), 2024-11-05
Supplement: d4qo01771d1.pdf [file d4qo01771d1.pdf]

*Supporting Information for*

**Iridium-Catalyzed Asymmetric Cascade Allylation/Lactonization of Methyl Salicylates: Enantioselective Construction of Chiral Benzodioxepinones**

Bendu Pan,<sup>a</sup> Yunru Wu,<sup>a</sup> Yaqi Zhang,<sup>a</sup> Xiaobo He,<sup>a</sup> Long Jiang,<sup>b</sup> and Liqin Qiu<sup>a,\*</sup>

<sup>a</sup>School of Chemistry, IGCME, Guangdong Provincial Key Laboratory of Chiral Molecules and Drug Discovery, The Key Laboratory of Low-Carbon Chemistry & Energy Conservation of Guangdong Province, Sun Yat-sen University, Guangzhou 510006, China

<sup>b</sup>Instrumental Analysis and Research Centre, SunYat-sen University, Guangzhou 510275, China

\*Email: [qiuliqin@mail.sysu.edu.cn](mailto:qiuliqin@mail.sysu.edu.cn)

**Table of Contents**

|                                                                                             |    |
|---------------------------------------------------------------------------------------------|----|
| 1. General considerations .....                                                             | 1  |
| 2. Table S1 Optimization of Reaction Conditions <sup>a</sup> .....                          | 2  |
| 3. Experimental Procedures.....                                                             | 4  |
| 3.1 General Procedure for the Synthesis of Substituted Methyl Salicylates <b>1</b> .....    | 4  |
| 3.2 General Procedure for the Asymmetric Cascade Allylation/Lactonization of <b>1</b> ..... | 7  |
| 3.3 Control Experiments on Kinetic Resolution.....                                          | 23 |
| 3.4 Stepwise Experiments: Investigation of the Reaction Pathways .....                      | 24 |
| References .....                                                                            | 27 |
| 4. Copies of NMR Spectra.....                                                               | 29 |
| 5. Copies of HPLC Chromatograms.....                                                        | 59 |
| 6. X-ray Crystallographic Data.....                                                         | 84 |

## 1. General considerations

Unless otherwise stated, all syntheses and manipulations of air- and moisture-sensitive materials were carried out in a nitrogen-filled glovebox or under nitrogen atmosphere using standard Schlenk techniques. All glassware was oven-dried prior to use. The heat source for all reactions is oil bath. All solvents were freshly distilled and degassed according to standard methods. Reactions were magnetically stirred and monitored by analytical thin-layer chromatography (TLC). TLC was performed on Merck silica gel 60 F254 TLC glass plates and visualized by exposure to ultraviolet light. Organic solutions were concentrated by rotary evaporation at 20 – 45 °C.

All chemicals and reagents available from commercial sources were directly used without further purification. Chromatographic purification of products was accomplished using forced-flow chromatography on silica gel (200 – 300 mesh).  $^1\text{H}$ ,  $^{19}\text{F}$ , and  $^{13}\text{C}$  NMR spectra were recorded on a Bruker Ascend 400 MHz or 600 MHz spectrometer at ambient temperature. High-resolution mass spectra (HRMS) were obtained with Shimadzu LC-20AT mass spectrometer. The mass analyzer type is ion trap. Optical rotations were measured on SGW®-5 automatic polarimeter. Enantiomeric excesses (*ee* values) of the products were determined by chiral HPLC analysis using an Agilent HP 1200 instrument (n-hexane/2-propanol as eluent) with a Chiralpak IC-3 or IA-3 Column. The phosphoramidite ligands **L1** – **L11** were known compounds and prepared according to the reported procedures<sup>[1]</sup>.

## 2. Table S1 Optimization of Reaction Conditions<sup>a</sup>

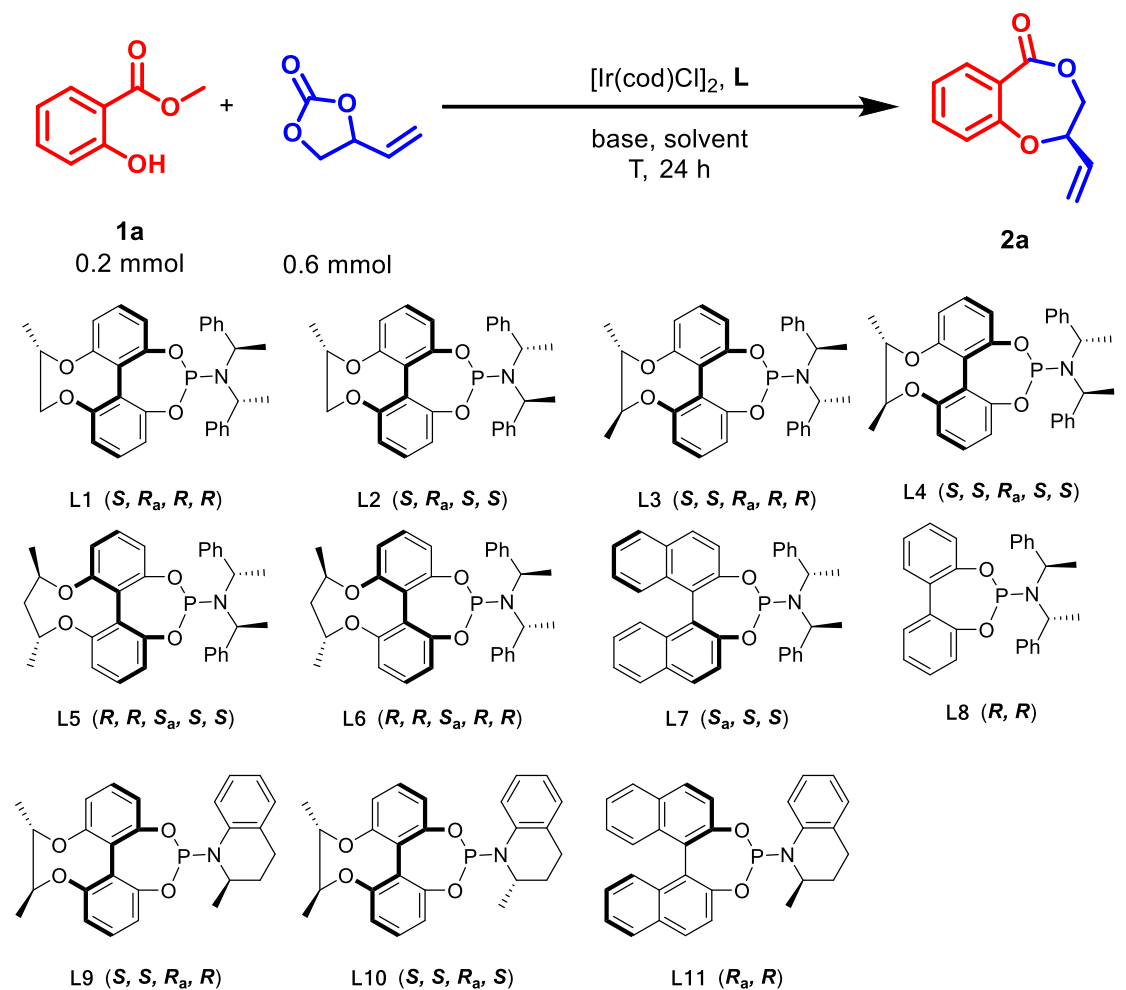

| entry | ligand     | $[\text{Ir}(\text{cod})\text{Cl}]_2$ loading<br>[mol %] | base                     | T<br>[°C] | solvent | yield <sup>b</sup><br>[%] | ee <sup>c</sup><br>[%] |
|-------|------------|---------------------------------------------------------|--------------------------|-----------|---------|---------------------------|------------------------|
| 1     | <b>L3</b>  | 2                                                       | DBU                      | 50        | THF     | 64                        | 86                     |
| 2     | <b>L1</b>  | 2                                                       | DBU                      | 50        | THF     | 60                        | 74                     |
| 3     | <b>L2</b>  | 2                                                       | DBU                      | 50        | THF     | 61                        | 58                     |
| 4     | <b>L4</b>  | 2                                                       | DBU                      | 50        | THF     | 70                        | 63                     |
| 5     | <b>L5</b>  | 2                                                       | DBU                      | 50        | THF     | 69                        | -83                    |
| 6     | <b>L6</b>  | 2                                                       | DBU                      | 50        | THF     | 67                        | -80                    |
| 7     | <b>L7</b>  | 2                                                       | DBU                      | 50        | THF     | 63                        | -80                    |
| 8     | <b>L8</b>  | 2                                                       | DBU                      | 50        | THF     | 51                        | 50                     |
| 9     | <b>L9</b>  | 2                                                       | DBU                      | 50        | THF     | 53                        | 8                      |
| 10    | <b>L10</b> | 2                                                       | DBU                      | 50        | THF     | 57                        | 1                      |
| 11    | <b>L11</b> | 2                                                       | DBU                      | 50        | THF     | 54                        | 19                     |
| 12    | <b>L3</b>  | 4                                                       | DBU                      | 50        | THF     | 65                        | 72                     |
| 13    | <b>L3</b>  | 6                                                       | DBU                      | 50        | THF     | 70                        | 58                     |
| 14    | <b>L3</b>  | 2                                                       | $\text{Cs}_2\text{CO}_3$ | 50        | THF     | 37                        | 46                     |
| 15    | <b>L3</b>  | 2                                                       | $\text{K}_3\text{PO}_4$  | 50        | THF     | ND                        |                        |
| 16    | <b>L3</b>  | 2                                                       | DBN                      | 50        | THF     | 66                        | 59                     |

|    |                   |     |                   |    |                                    |       |     |
|----|-------------------|-----|-------------------|----|------------------------------------|-------|-----|
| 17 | L3                | 2   | Et <sub>3</sub> N | 50 | THF                                | ND    |     |
| 18 | L3                | 2   | DABCO             | 50 | THF                                | ND    |     |
| 19 | L3                | 2   | DBU               | 25 | THF                                | 39    | 73  |
| 20 | L3                | 2   | DBU               | 40 | THF                                | 61    | 62  |
| 21 | L3                | 2   | DBU               | 60 | THF                                | 73    | 76  |
| 22 | L3                | 2   | DBU               | 65 | THF                                | 77    | 85  |
| 23 | L3                | 2   | DBU               | 70 | THF                                | 83    | 86  |
| 24 | L3                | 2   | DBU               | 75 | THF                                | 84    | 85  |
| 25 | L3                | 2   | DBU               | 80 | THF                                | 87    | 82  |
| 26 | L3                | 2   | DBU               | 70 | 1,4-dioxane                        | 61    | 77  |
| 27 | L3                | 2   | DBU               | 70 | PhMe                               | 67    | 74  |
| 28 | L3                | 2   | DBU               | 70 | DCE                                | trace |     |
| 29 | L3                | 2   | DBU               | 70 | MeCN                               | 90    | 64  |
| 30 | L3                | 2   | DBU               | 70 | DME                                | 87    | 80  |
| 31 | L3                | 2   | DBU               | 70 | CH <sub>3</sub> CH <sub>2</sub> OH | ND    |     |
| 32 | L3 <sup>d</sup>   | 2   | DBU               | 70 | THF                                | 82    | 85  |
| 33 | L3 <sup>e</sup>   | 2   | DBU               | 70 | THF                                | 70    | 81  |
| 34 | L3 <sup>f</sup>   | 2   | DBU               | 70 | THF                                | 82    | 86  |
| 35 | L3                | 1   | DBU               | 70 | THF                                | 82    | 90  |
| 36 | L3                | 0.5 | DBU               | 70 | THF                                | 69    | 80  |
| 37 | L3 <sup>g</sup>   | 1   | DBU               | 70 | THF                                | 78    | 83  |
| 38 | L7                | 1   | DBU               | 70 | THF                                | 80    | -88 |
| 39 | L3 <sup>h</sup>   | 1   | DBU               | 70 | THF                                | 84    | 73  |
| 40 | L3 <sup>i,j</sup> | 1   | DBU               | 70 | THF                                | 81    | 93  |
| 41 | L3 <sup>j,k</sup> | 1   | DBU               | 70 | THF                                | 82    | 95  |

<sup>a</sup> Conditions: [Ir(cod)Cl]<sub>2</sub>, L, base, **1a** (0.2 mmol), VEC in solvent for 24 h. <sup>b</sup> Isolated yields. <sup>c</sup> Determined by HPLC analysis. <sup>d</sup> 0.2 mmol of DBU was used. <sup>e</sup> 0.4 mmol of VEC was used. <sup>f</sup> 0.8 mmol of VEC was used. <sup>g</sup> ethyl 2-hydroxybenzoate was used instead of **1a**. <sup>h</sup> 0.5 mL of THF was used. <sup>i</sup> 4.0 mL of THF was used. <sup>j</sup> 36 hours reaction time. <sup>k</sup> 5.0 mL of THF was used.

### 3. Experimental Procedures

#### 3.1 General Procedure for the Synthesis of Substituted Methyl Salicylates **1**

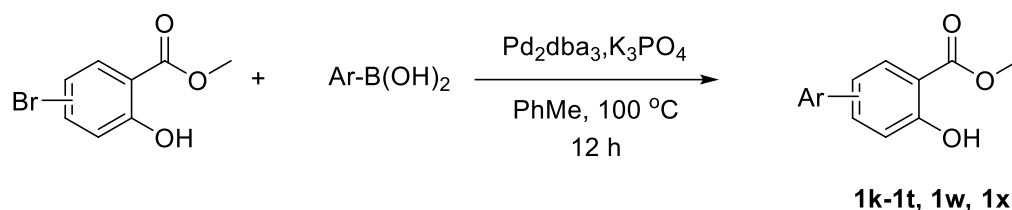

In a dry Schlenk tube filled with argon, methyl bromosalicylate (230.0 mg, 1 mmol, 1.0 equiv), Ar-B(OH)<sub>2</sub> (2 mmol, 2.0 equiv), Pd<sub>2</sub>dba<sub>3</sub> (45.8 mg, 0.05 mmol, 0.05 equiv), S-Phos (41.0 mg, 0.1 mmol, 0.1 equiv) and K<sub>3</sub>PO<sub>4</sub> (530.7 mg, 2.5 mmol, 2.5 equiv) were dissolved in PhMe (5.0 mL). The reaction mixture was heated at 100 °C for 24 h. Then the solvent was evaporated under reduced pressure and the residue was purified by silica gel column chromatography using petroleum/EtOAc (10 : 1) as the eluent to give the desired product **1k-1t**, **1w** and **1x**. The synthesis of **1k-1p**, **1w** has been reported in previous literature<sup>[2]</sup>.

#### Methyl 2-hydroxy-5-(thiophen-2-yl)benzoate (**1q**)

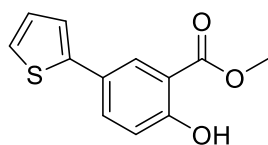

Yellow oil, 0.21 g, 90% yield; <sup>1</sup>H NMR (600 MHz, Chloroform-*d*) δ 10.80 (s, 1H), 8.08 (d, *J* = 2.3 Hz, 1H), 7.72 (dd, *J* = 8.8, 2.3 Hz, 1H), 7.28 – 7.23 (m, 2H), 7.09 (ddd, *J* = 5.1, 3.4, 1.5 Hz, 1H), 7.05 – 7.02 (m, 1H), 4.01 (s, 3H). <sup>13</sup>C NMR (151 MHz, Chloroform-*d*) δ 170.30, 161.03, 143.26, 133.40, 127.98, 127.04, 126.12, 124.26, 122.59, 118.18, 112.57, 52.40. HRMS (ESI) calcd for C<sub>12</sub>H<sub>9</sub>O<sub>3</sub>S [M-H]<sup>-</sup>: 233.0278, Found: 233.0281.

### Methyl 5-(benzofuran-2-yl)-2-hydroxybenzoate (1r)

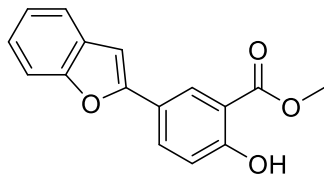

Light red oil, 0.23 g, 86% yield;  $^1\text{H}$  NMR (600 MHz, Chloroform-*d*)  $\delta$  10.93 (s, 1H), 8.36 (d,  $J = 2.3$  Hz, 1H), 7.95 (dd,  $J = 8.7, 2.3$  Hz, 1H), 7.60 – 7.57 (m, 1H), 7.55 – 7.52 (m, 1H), 7.31 – 7.28 (m, 1H), 7.25 (td,  $J = 7.4, 1.1$  Hz, 1H), 7.09 (d,  $J = 8.7$  Hz, 1H), 6.94 (d,  $J = 1.0$  Hz, 1H), 4.04 (s, 3H).  $^{13}\text{C}$  NMR (151 MHz, Chloroform-*d*)  $\delta$  170.29, 161.82, 154.96, 154.76, 138.40, 132.23, 129.29, 126.41, 124.09, 122.99, 120.73, 119.57, 118.27, 111.04, 100.27, 52.47. HRMS (ESI) calcd for  $\text{C}_{16}\text{H}_{11}\text{O}_4$  [M-H] $^-$ : 267.0663, Found: 267.0670.

### Methyl 5-(furan-2-yl)-2-hydroxybenzoate (1s)

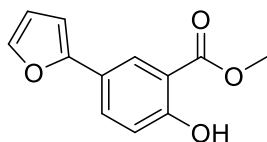

Light red oil, 0.19 g, 87% yield;  $^1\text{H}$  NMR (600 MHz, Chloroform-*d*)  $\delta$  10.80 (s, 1H), 8.16 (d,  $J = 2.3$  Hz, 1H), 7.77 (dd,  $J = 8.7, 2.3$  Hz, 1H), 7.46 (dd,  $J = 1.8, 0.8$  Hz, 1H), 7.03 (d,  $J = 8.7$  Hz, 1H), 6.57 (dd,  $J = 3.4, 0.8$  Hz, 1H), 6.48 (dd,  $J = 3.4, 1.8$  Hz, 1H), 4.00 (s, 3H).  $^{13}\text{C}$  NMR (151 MHz, Chloroform-*d*)  $\delta$  170.37, 160.89, 153.06, 141.69, 131.34, 125.10, 122.85, 118.04, 112.47, 111.60, 103.91, 52.35. HRMS (ESI) calcd for  $\text{C}_{12}\text{H}_9\text{O}_4$  [M-H] $^-$ : 217.0506, Found: 217.0507.

### Methyl 4'-(benzyloxy)-4-hydroxy-[1,1'-biphenyl]-3-carboxylate (1t)

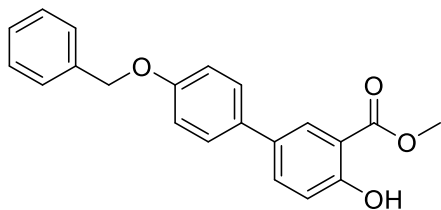

White oil, 0.25 g, 75% yield;  $^1\text{H}$  NMR (600 MHz, Chloroform-*d*)  $\delta$  10.73 (s, 1H), 8.04 (d,  $J = 2.5$  Hz, 1H), 7.68 (dd,  $J = 8.6, 2.4$  Hz, 1H), 7.49 (dd,  $J = 9.2, 7.2$  Hz, 4H), 7.44 – 7.41 (m, 2H), 7.38 – 7.35 (m, 1H), 7.06 (d,  $J = 8.7$  Hz, 3H), 5.14 (s, 2H), 4.00 (s, 3H).  $^{13}\text{C}$  NMR (151 MHz, Chloroform-*d*)  $\delta$  170.55, 160.61, 158.22, 136.99, 134.10, 132.84, 132.16, 128.95, 128.60, 128.37, 127.98, 127.69, 127.65, 127.43, 117.97, 115.29, 112.50, 70.18, 52.29. HRMS (ESI) calcd for  $\text{C}_{21}\text{H}_{17}\text{O}_4$   $[\text{M}-\text{H}]^-$ : 333.1132, Found: 333.1139.

#### Methyl 2-hydroxy-4-(thiophen-2-yl)benzoate (1x)

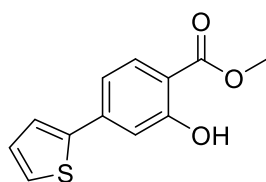

Yellow oil, 0.21 g, 90% yield;  $^1\text{H}$  NMR (600 MHz, Chloroform-*d*)  $\delta$  10.84 (s, 1H), 7.84 (d,  $J = 8.3$  Hz, 1H), 7.44 (d,  $J = 3.6$  Hz, 1H), 7.38 (d,  $J = 5.1$  Hz, 1H), 7.16 (dd,  $J = 8.4, 1.9$  Hz, 1H), 7.13 (t,  $J = 4.3$  Hz, 1H), 3.98 (s, 3H).  $^{13}\text{C}$  NMR (151 MHz, Chloroform-*d*)  $\delta$  170.27, 161.87, 142.74, 141.31, 130.50, 128.25, 126.60, 124.91, 116.80, 113.99, 111.13, 52.27. HRMS (ESI) calcd for  $\text{C}_{12}\text{H}_9\text{O}_3\text{S}$   $[\text{M}-\text{H}]^-$ : 233.0278, Found: 233.0281.

### 3.2 General Procedure for the Asymmetric Cascade Alkylation/Lactonization of **1**

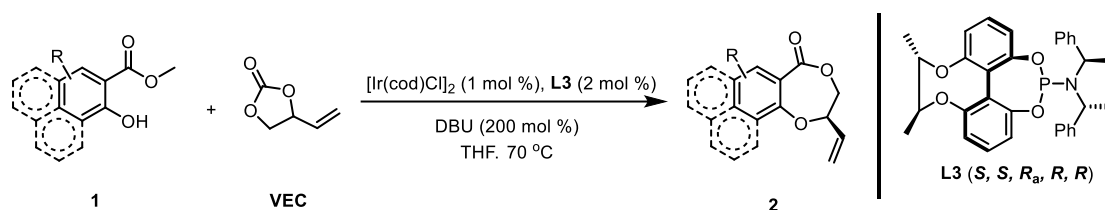

In a dry Schlenk tube filled with argon,  $[\text{Ir}(\text{cod})\text{Cl}]_2$  (2.7 mg, 0.004 mmol, 1 mol %), phosphoramidite ligand **L3** (4.2 mg, 0.008 mmol, 2 mol %), and *n*propylamine (0.5 mL) were dissolved in THF (1.0 mL). The reaction mixture was heated at 50 °C for 30 min and then the volatile solvents were removed in vacuum to give a yellow solid. Subsequently, (substituted) methyl salicylate **1** (0.4 mmol), **VEC 2** (137.0 mg, 3.0 equiv.), DBU (121.8 mg, 200 mol %) and THF (5.0 mL) were added to the tube. The system was stirred at 70 °C until the reaction was completed. Then the solvent was evaporated and the residue was purified by silica gel column chromatography using petroleum/EtOAc (8 : 1) as the eluent to give the desired products **2**.

#### *(R)*-2-vinyl-2,3-dihydro-5*H*-benzo[*e*][1,4]dioxepin-5-one (**2a**)

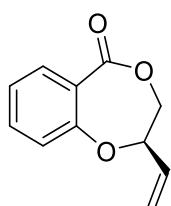

$R_f = 0.40$  (petroleum/EtOAc = 4 : 1, v/v); colorless oil, 62.3 mg, 82% yield; 95% ee [Daicel Chiralcel IC-3 (0.46 cm x 25 cm), *n*-hexane/2-propanol = 70/30,  $\nu = 1.0 \text{ mL} \cdot \text{min}^{-1}$ ,  $T = 25 \text{ }^\circ\text{C}$ ,  $\lambda = 254 \text{ nm}$ ,  $t_R$  (minor) = 14.777 min,  $t_R$  (major) = 17.954 min];  $[\alpha]_D^{25} = +175.6^\circ$  ( $c = 0.75$ ,  $\text{CH}_2\text{Cl}_2$ ).  $^1\text{H NMR}$  (600 MHz, Chloroform-*d*)  $\delta$  7.81 (dd,  $J = 7.0, 4.6 \text{ Hz}$ , 1H), 7.56 – 7.49 (m, 1H), 7.20 – 7.16



(m, 1H), 7.07 (dd,  $J = 8.5, 2.9$  Hz, 1H), 5.97 – 5.89 (m, 1H), 5.51 (dd,  $J = 17.3, 2.6$  Hz, 1H), 5.39 (dd,  $J = 10.8, 3.2$  Hz, 1H), 5.08 – 5.02 (m, 1H), 4.42 – 4.36 (m, 1H), 4.32 – 4.27 (m, 1H).  $^{13}\text{C}$  NMR (151 MHz, Chloroform- $d$ )  $\delta$  169.11, 153.62, 134.84, 132.68, 132.16, 123.60, 122.09, 121.51, 119.30, 81.47, 67.69. HRMS(ESI) calcd for  $\text{C}_{11}\text{H}_{11}\text{O}_3$   $[\text{M}+\text{H}]^+$ : 191.0703, Found: 191.0702.

**(*R*)-7-methyl-2-vinyl-2,3-dihydro-5*H*-benzo[*e*][1,4]dioxepin-5-one (2b)**

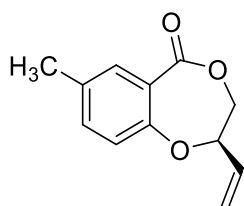

$R_f = 0.40$  (petroleum/EtOAc = 4 : 1, v/v); colorless oil, 69.4 mg, 85% yield; 94% ee [Daicel Chiralcel IC-3 (0.46 cm x 25 cm), *n*-hexane/2-propanol = 65/35,  $v = 1.0$  mL $\cdot$ min $^{-1}$ ,  $T = 25$  °C,  $\lambda = 254$  nm,  $t_R$  (minor) = 16.374 min,  $t_R$  (major) = 24.532 min];  $[\alpha]_D^{25} = +163.2^\circ$  ( $c = 0.75$ ,  $\text{CH}_2\text{Cl}_2$ ).  $^1\text{H}$  NMR (600 MHz, Chloroform- $d$ )  $\delta$  7.60 (d,  $J = 2.3$  Hz, 1H), 7.33 (dd,  $J = 8.3, 2.3$  Hz, 1H), 6.97 (d,  $J = 8.3$  Hz, 1H), 5.96 – 5.89 (m, 1H), 5.54 – 5.47 (m, 1H), 5.41 – 5.36 (m, 1H), 5.04 – 4.99 (m, 1H), 4.40 – 4.36 (m, 1H), 4.30 – 4.25 (m, 1H), 2.36 (s, 3H).  $^{13}\text{C}$  NMR (151 MHz, Chloroform- $d$ )  $\delta$  169.40, 151.33, 135.62, 133.46, 132.42, 132.30, 121.99, 121.47, 119.23, 81.36, 67.69, 20.38. HRMS(ESI) calcd for  $\text{C}_{12}\text{H}_{13}\text{O}_3$   $[\text{M}+\text{H}]^+$ : 205.0859, Found: 205.0859.

**(*R*)-8-methoxy-2-vinyl-2,3-dihydro-5*H*-benzo[*e*][1,4]dioxepin-5-one (2c)**

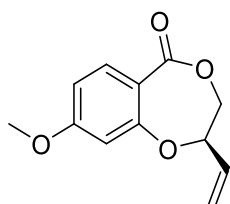

$R_f = 0.30$  (petroleum/EtOAc = 4 : 1, v/v); colorless oil, 45.8 mg, 52% yield; 90% ee [Daicel Chiralcel IC-3 (0.46 cm x 25 cm), *n*-hexane/2-propanol = 65/35,  $\nu = 1.0 \text{ mL} \cdot \text{min}^{-1}$ ,  $T = 25 \text{ }^\circ\text{C}$ ,  $\lambda = 254 \text{ nm}$ ,  $t_R$  (minor) = 21.060 min,  $t_R$  (major) = 24.869 min];  $[\alpha]_D^{25} = +132.9^\circ$  ( $c = 0.75$ ,  $\text{CH}_2\text{Cl}_2$ ).  $^1\text{H NMR}$  (600 MHz, Chloroform-*d*)  $\delta$  7.83 (d,  $J = 8.9 \text{ Hz}$ , 1H), 6.72 (dd,  $J = 8.8, 2.5 \text{ Hz}$ , 1H), 6.55 (d,  $J = 2.5 \text{ Hz}$ , 1H), 5.98 – 5.92 (m, 1H), 5.54 – 5.50 (m, 1H), 5.43 – 5.39 (m, 1H), 5.08 – 5.03 (m, 1H), 4.44 – 4.39 (m, 1H), 4.37 – 4.31 (m, 1H), 3.86 (s, 3H).  $^{13}\text{C NMR}$  (151 MHz, Chloroform-*d*)  $\delta$  168.74, 165.09, 155.88, 134.93, 132.16, 119.17, 112.55, 110.42, 105.56, 81.38, 67.97, 55.62. HRMS(ESI) calcd for  $\text{C}_{12}\text{H}_{13}\text{O}_4$   $[\text{M}+\text{H}]^+$ : 221.0808, Found: 221.0809.

**(*R*)-7-methoxy-2-vinyl-2,3-dihydro-5*H*-benzo[*e*][1,4]dioxepin-5-one (2d)**

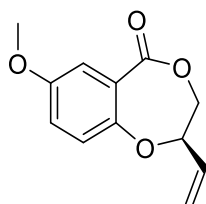

$R_f = 0.35$  (petroleum/EtOAc = 4 : 1, v/v); colorless oil, 73.1 mg, 83% yield; 91% ee [Daicel Chiralcel IC-3 (0.46 cm x 25 cm), *n*-hexane/2-propanol = 65/35,  $\nu = 1.0 \text{ mL} \cdot \text{min}^{-1}$ ,  $T = 25 \text{ }^\circ\text{C}$ ,  $\lambda = 254 \text{ nm}$ ,  $t_R$  (minor) = 16.206 min,  $t_R$  (major) = 22.926 min];  $[\alpha]_D^{25} = +152.5^\circ$  ( $c = 0.75$ ,  $\text{CH}_2\text{Cl}_2$ ).  $^1\text{H NMR}$  (600 MHz, Chloroform-*d*)  $\delta$  7.28 – 7.24 (m, 1H), 7.10 – 7.06 (m, 1H), 7.03 – 6.99 (m, 1H), 5.96 – 5.88 (m, 1H), 5.52 – 5.47 (m, 1H), 5.41 – 5.36 (m, 1H), 5.01 – 4.96 (m, 1H), 4.40 – 4.35 (m, 1H), 4.28 – 4.23 (m, 1H), 3.83 (s, 3H).  $^{13}\text{C NMR}$  (151 MHz, Chloroform-*d*)  $\delta$  169.15, 155.80, 147.12, 132.32, 123.50, 122.84, 121.92, 119.37, 114.82, 81.42, 67.69, 55.84. HRMS(ESI) calcd for  $\text{C}_{12}\text{H}_{13}\text{O}_4$   $[\text{M}+\text{H}]^+$ : 221.0808, Found: 221.0808.

**(*R*)-8-fluoro-2-vinyl-2,3-dihydro-5*H*-benzo[*e*][1,4]dioxepin-5-one (2e)**

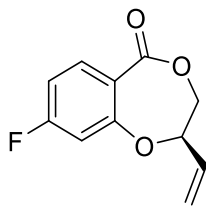

$R_f = 0.40$  (petroleum/EtOAc = 4 : 1, v/v); colorless oil, 59.1 mg, 71% yield; 82% ee [Daicel Chiralcel IC-3 (0.46 cm x 25 cm), *n*-hexane/2-propanol = 65/35,  $\nu = 1.0 \text{ mL} \cdot \text{min}^{-1}$ ,  $T = 25 \text{ }^\circ\text{C}$ ,  $\lambda = 254 \text{ nm}$ ,  $t_R$  (minor) = 11.065 min,  $t_R$  (major) = 11.908 min];  $[\alpha]_D^{25} = +100.3^\circ$  ( $c = 0.75$ ,  $\text{CH}_2\text{Cl}_2$ ).  $^1\text{H NMR}$  (600 MHz, Chloroform-*d*)  $\delta$  7.90 (dd,  $J = 8.9, 6.5 \text{ Hz}$ , 1H), 6.90 (ddd,  $J = 8.8, 7.5, 2.5 \text{ Hz}$ , 1H), 6.79 (dd,  $J = 9.6, 2.5 \text{ Hz}$ , 1H), 5.98 – 5.90 (m, 1H), 5.52 (dt,  $J = 17.2, 1.2 \text{ Hz}$ , 1H), 5.43 (dt,  $J = 10.6, 1.2 \text{ Hz}$ , 1H), 5.12 – 5.07 (m, 1H), 4.44 (dd,  $J = 13.9, 2.5 \text{ Hz}$ , 1H), 4.35 (dd,  $J = 13.9, 6.9 \text{ Hz}$ , 1H).  $^{13}\text{C NMR}$  (151 MHz, Chloroform-*d*)  $\delta$  167.96, 167.48, 165.79, 135.45 (d,  $J = 10.6 \text{ Hz}$ ), 131.64, 119.54, 116.79 (d,  $J = 3.0 \text{ Hz}$ ), 111.21 (d,  $J = 21.1 \text{ Hz}$ ), 108.74 (d,  $J = 24.2 \text{ Hz}$ ), 81.65, 67.80.  $^{19}\text{F NMR}$  (377 MHz,  $\text{CDCl}_3$ )  $\delta$  -103.20. HRMS(ESI) calcd for  $\text{C}_{11}\text{H}_{10}\text{FO}_3$   $[\text{M}+\text{H}]^+$ : 209.0609, Found: 209.0608.

**(R)-8-chloro-2-vinyl-2,3-dihydro-5H-benzo[e][1,4]dioxepin-5-one (2f)**

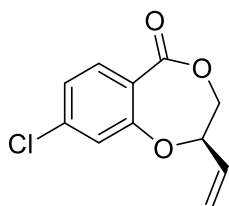

$R_f = 0.40$  (petroleum/EtOAc = 4 : 1, v/v); colorless oil, 60.9 mg, 68% yield; 83% ee [Daicel Chiralcel IC-3 (0.46 cm x 25 cm), *n*-hexane/2-propanol = 65/35,  $\nu = 1.0 \text{ mL} \cdot \text{min}^{-1}$ ,  $T = 25 \text{ }^\circ\text{C}$ ,  $\lambda = 254 \text{ nm}$ ,  $t_R$  (minor) = 11.428 min,  $t_R$  (major) = 12.469 min];  $[\alpha]_D^{25} = +97.9^\circ$  ( $c = 0.75$ ,  $\text{CH}_2\text{Cl}_2$ ).  $^1\text{H NMR}$  (600 MHz, Chloroform-*d*)  $\delta$  7.80 (d,  $J = 8.5 \text{ Hz}$ , 1H), 7.16 (dd,  $J = 8.5, 2.0 \text{ Hz}$ , 1H), 7.11 (d,  $J = 2.0 \text{ Hz}$ , 1H), 5.96 – 5.89 (m, 1H), 5.54 – 5.49 (m, 1H), 5.45 – 5.40 (m, 1H),

5.11 – 5.06 (m, 1H), 4.43 (dd,  $J = 13.9, 2.6$  Hz, 1H), 4.34 (dd,  $J = 13.9, 7.0$  Hz, 1H).  $^{13}\text{C}$  NMR (151 MHz, Chloroform- $d$ )  $\delta$  168.02, 154.42, 140.69, 134.20, 131.60, 123.84, 122.00, 119.62, 119.14, 81.64, 67.75. HRMS(ESI) calcd for  $\text{C}_{11}\text{H}_{10}\text{ClO}_3$   $[\text{M}+\text{H}]^+$ : 225.0313, Found: 225.0312.

**(*R*)-7-chloro-2-vinyl-2,3-dihydro-5*H*-benzo[*e*][1,4]dioxepin-5-one (2g)**

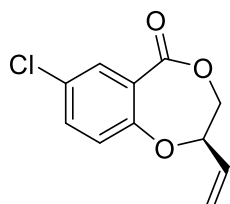

$R_f = 0.40$  (petroleum/EtOAc = 4 : 1, v/v); colorless oil, 74.4 mg, 83% yield; 84% ee [Daicel Chiralcel IC-3 (0.46 cm x 25 cm), *n*-hexane/2-propanol = 65/35,  $v = 1.0 \text{ mL} \cdot \text{min}^{-1}$ ,  $T = 25 \text{ }^\circ\text{C}$ ,  $\lambda = 254 \text{ nm}$ ,  $t_R$  (minor) = 11.228 min,  $t_R$  (major) = 12.791 min];  $[\alpha]_{\text{D}}^{25} = +108.2^\circ$  ( $c = 0.75$ ,  $\text{CH}_2\text{Cl}_2$ ).  $^1\text{H}$  NMR (600 MHz, Chloroform- $d$ )  $\delta$  7.81 (dd,  $J = 2.8, 1.6$  Hz, 1H), 7.48 (dd,  $J = 8.7, 2.6$  Hz, 1H), 7.03 (d,  $J = 8.7$  Hz, 1H), 5.95 – 5.88 (m, 1H), 5.51 (dt,  $J = 17.2, 1.2$  Hz, 1H), 5.42 (dt,  $J = 10.6, 1.2$  Hz, 1H), 5.09 – 5.04 (m, 1H), 4.42 (dd,  $J = 13.9, 2.8$  Hz, 1H), 4.32 (dd,  $J = 13.9, 7.1$  Hz, 1H).  $^{13}\text{C}$  NMR (151 MHz, Chloroform- $d$ )  $\delta$  167.63, 152.25, 134.78, 132.14, 131.69, 128.80, 123.58, 122.39, 119.63, 81.52, 67.74. HRMS(ESI) calcd for  $\text{C}_{11}\text{H}_{10}\text{ClO}_3$   $[\text{M}+\text{H}]^+$ : 225.0313, Found: 225.0312.

**(*R*)-8-bromo-2-vinyl-2,3-dihydro-5*H*-benzo[*e*][1,4]dioxepin-5-one (2h)**

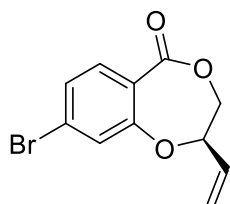

$R_f = 0.40$  (petroleum/EtOAc = 4 : 1, v/v); colorless oil, 75.0 mg, 70% yield; 81%

ee [Daicel Chiralcel IC-3 (0.46 cm x 25 cm), *n*-hexane/2-propanol = 65/35,  $\nu$  = 1.0 mL $\cdot$ min<sup>-1</sup>, T = 25 °C,  $\lambda$  = 254 nm,  $t_R$  (minor) = 11.970 min,  $t_R$  (major) = 13.076 min];  $[\alpha]_D^{25} = +90.3^\circ$  (c = 0.75, CH<sub>2</sub>Cl<sub>2</sub>). <sup>1</sup>H NMR (600 MHz, Chloroform-*d*)  $\delta$  7.72 (d,  $J$  = 8.4 Hz, 1H), 7.31 (dd,  $J$  = 8.4, 1.9 Hz, 1H), 7.29 – 7.27 (m, 1H), 5.96 – 5.89 (m, 1H), 5.52 (dt,  $J$  = 17.2, 1.2 Hz, 1H), 5.42 (dt,  $J$  = 10.6, 1.2 Hz, 1H), 5.11 – 5.06 (m, 1H), 4.42 (dd,  $J$  = 13.9, 2.6 Hz, 1H), 4.33 (dd,  $J$  = 13.9, 7.0 Hz, 1H). <sup>13</sup>C NMR (151 MHz, Chloroform-*d*)  $\delta$  168.13, 154.27, 134.18, 131.59, 128.92, 126.76, 125.01, 119.65, 81.68, 67.72. HRMS(ESI) calcd for C<sub>11</sub>H<sub>10</sub>BrO<sub>3</sub> [M+H]<sup>+</sup>: 268.9808, Found: 268.9809.

**(*R*)-7-bromo-2-vinyl-2,3-dihydro-5*H*-benzo[*e*][1,4]dioxepin-5-one (2i)**

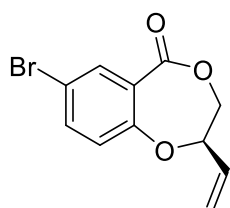

$R_f$  = 0.40 (petroleum/EtOAc = 4 : 1, v/v); colorless oil, 83.6 mg, 78% yield; 85% ee [Daicel Chiralcel IC-3 (0.46 cm x 25 cm), *n*-hexane/2-propanol = 65/35,  $\nu$  = 1.0 mL $\cdot$ min<sup>-1</sup>, T = 25 °C,  $\lambda$  = 254 nm,  $t_R$  (minor) = 11.591 min,  $t_R$  (major) = 13.401 min];  $[\alpha]_D^{25} = +101.3^\circ$  (c = 0.75, CH<sub>2</sub>Cl<sub>2</sub>). <sup>1</sup>H NMR (600 MHz, Chloroform-*d*)  $\delta$  7.94 (d,  $J$  = 2.5 Hz, 1H), 7.61 (dd,  $J$  = 8.7, 2.5 Hz, 1H), 6.97 (d,  $J$  = 8.7 Hz, 1H), 5.95 – 5.87 (m, 1H), 5.50 (dt,  $J$  = 17.2, 1.2 Hz, 1H), 5.41 (dt,  $J$  = 10.7, 1.2 Hz, 1H), 5.09 – 5.04 (m, 1H), 4.42 (dd,  $J$  = 13.9, 2.7 Hz, 1H), 4.32 (dd,  $J$  = 13.9, 7.0 Hz, 1H). <sup>13</sup>C NMR (151 MHz, Chloroform-*d*)  $\delta$  167.50, 152.80, 137.69, 135.13, 131.66, 123.89, 122.69, 119.63, 115.88, 81.49, 67.74. HRMS(ESI) calcd for C<sub>11</sub>H<sub>10</sub>BrO<sub>3</sub> [M+H]<sup>+</sup>: 268.9808, Found: 268.9806.

**(*R*)-7-iodo-2-vinyl-2,3-dihydro-5*H*-benzo[*e*][1,4]dioxepin-5-one (2j)**

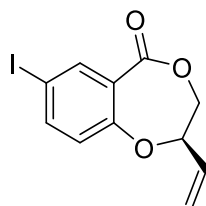

$R_f = 0.40$  (petroleum/EtOAc = 4 : 1, v/v); colorless oil, 102.4 mg, 81% yield; 84% ee [Daicel Chiralcel IC-3 (0.46 cm x 25 cm), *n*-hexane/2-propanol = 65/35,  $\nu = 1.0 \text{ mL} \cdot \text{min}^{-1}$ ,  $T = 25 \text{ }^\circ\text{C}$ ,  $\lambda = 254 \text{ nm}$ ,  $t_R$  (minor) = 12.020 min,  $t_R$  (major) = 14.210 min];  $[\alpha]_D^{25} = +100.2^\circ$  ( $c = 0.75$ ,  $\text{CH}_2\text{Cl}_2$ ).  $^1\text{H NMR}$  (600 MHz, Chloroform-*d*)  $\delta$  8.14 – 8.10 (m, 1H), 7.82 – 7.74 (m, 1H), 5.95 – 5.85 (m, 1H), 5.53 – 5.47 (m, 1H), 5.45 – 5.38 (m, 1H), 5.11 – 5.03 (m, 1H), 4.42 (dd,  $J = 14.0$ , 2.6 Hz, 1H), 4.32 (dd,  $J = 13.9$ , 7.0 Hz, 1H).  $^{13}\text{C NMR}$  (151 MHz, Chloroform-*d*)  $\delta$  167.37, 153.58, 143.53, 141.13, 131.65, 124.13, 122.92, 119.61, 85.70, 81.48, 67.74. HRMS(ESI) calcd for  $\text{C}_{11}\text{H}_{10}\text{IO}_3$   $[\text{M}+\text{H}]^+$ : 316.9669, Found: 316.9669.

**(*R*)-7-phenyl-2-vinyl-2,3-dihydro-5*H*-benzo[*e*][1,4]dioxepin-5-one (2k)**

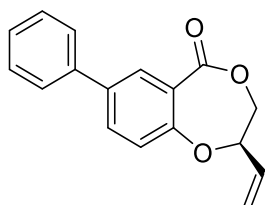

$R_f = 0.40$  (petroleum/EtOAc = 4 : 1, v/v); colorless oil, 75.6 mg, 71% yield; 93% ee [Daicel Chiralcel IC-3 (0.46 cm x 25 cm), *n*-hexane/2-propanol = 65/35,  $\nu = 1.0 \text{ mL} \cdot \text{min}^{-1}$ ,  $T = 25 \text{ }^\circ\text{C}$ ,  $\lambda = 254 \text{ nm}$ ,  $t_R$  (minor) = 14.233 min,  $t_R$  (major) = 20.439 min];  $[\alpha]_D^{25} = +143.9^\circ$  ( $c = 0.75$ ,  $\text{CH}_2\text{Cl}_2$ ).  $^1\text{H NMR}$  (600 MHz, Chloroform-*d*)  $\delta$  8.07 (d,  $J = 2.4 \text{ Hz}$ , 1H), 7.77 (dd,  $J = 8.4$ , 2.4 Hz, 1H), 7.61 – 7.58 (m, 2H), 7.46 (dd,  $J = 8.5$ , 7.0 Hz, 2H), 7.40 – 7.36 (m, 1H), 7.16 (d,  $J = 8.5 \text{ Hz}$ , 1H), 6.01 – 5.93 (m, 1H), 5.55 (dt,  $J = 17.3$ , 1.3 Hz, 1H), 5.43 (dt,  $J = 10.5$ , 1.3 Hz, 1H), 5.10 (ddd,  $J = 7.3$ , 5.9, 3.0, 1.5 Hz, 1H), 4.46 (dd,  $J = 13.8$ ,

2.9 Hz, 1H), 4.37 (dd,  $J = 13.8, 7.1$  Hz, 1H).  $^{13}\text{C}$  NMR (151 MHz, Chloroform-*d*)  $\delta$  169.05, 153.01, 139.09, 136.78, 133.40, 132.12, 131.10, 128.93, 127.64, 126.81, 122.56, 121.49, 119.40, 81.54, 67.81. HRMS(ESI) calcd for  $\text{C}_{17}\text{H}_{15}\text{O}_3$   $[\text{M}+\text{H}]^+$ : 267.1016, Found: 267.1017.

**(*R*)-7-(*p*-tolyl)-2-vinyl-2,3-dihydro-5*H*-benzo[*e*][1,4]dioxepin-5-one (2l)**

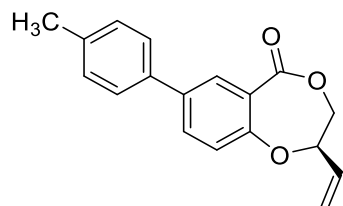

$R_f = 0.40$  (petroleum/EtOAc = 4 : 1, v/v); colorless oil, 86.3 mg, 77% yield; 93% ee [Daicel Chiralcel IC-3 (0.46 cm x 25 cm), *n*-hexane/2-propanol = 65/35,  $v = 1.0 \text{ mL} \cdot \text{min}^{-1}$ ,  $T = 25 \text{ }^\circ\text{C}$ ,  $\lambda = 254 \text{ nm}$ ,  $t_R$  (minor) = 14.674 min,  $t_R$  (major) = 21.687 min];  $[\alpha]_D^{25} = +137.7^\circ$  ( $c = 0.75$ ,  $\text{CH}_2\text{Cl}_2$ ).  $^1\text{H}$  NMR (600 MHz, Chloroform-*d*)  $\delta$  8.05 (d,  $J = 2.4$  Hz, 1H), 7.75 (dd,  $J = 8.5, 2.4$  Hz, 1H), 7.50 (d,  $J = 8.0$  Hz, 2H), 7.29 – 7.26 (m, 2H), 7.15 (d,  $J = 8.4$  Hz, 1H), 6.01 – 5.93 (m, 1H), 5.55 (dt,  $J = 17.2, 1.3$  Hz, 1H), 5.43 (dt,  $J = 10.6, 1.2$  Hz, 1H), 5.10 (dddt,  $J = 7.3, 6.0, 3.0, 1.4$  Hz, 1H), 4.45 (dd,  $J = 13.8, 2.9$  Hz, 1H), 4.37 (dd,  $J = 13.8, 7.2$  Hz, 1H), 2.42 (s, 3H).  $^{13}\text{C}$  NMR (151 MHz, Chloroform-*d*)  $\delta$  169.13, 152.73, 137.49, 136.80, 136.21, 133.20, 132.16, 130.79, 129.64, 126.64, 122.51, 121.55, 119.38, 81.53, 67.79, 21.08. HRMS(ESI) calcd for  $\text{C}_{18}\text{H}_{17}\text{O}_3$   $[\text{M}+\text{H}]^+$ : 281.1172, Found: 281.1173.

**(*R*)-7-(4-methoxyphenyl)-2-vinyl-2,3-dihydro-5*H*-benzo[*e*][1,4]dioxepin-5-one (2m)**

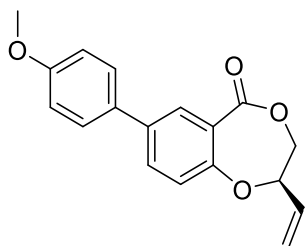

$R_f = 0.30$  (petroleum/EtOAc = 4 : 1, v/v); colorless oil, 87.6 mg, 74% yield; 93% ee [Daicel Chiralcel IC-3 (0.46 cm x 25 cm), *n*-hexane/2-propanol = 65/35,  $\nu = 1.0 \text{ mL} \cdot \text{min}^{-1}$ ,  $T = 25 \text{ }^\circ\text{C}$ ,  $\lambda = 254 \text{ nm}$ ,  $t_R$  (minor) = 20.310 min,  $t_R$  (major) = 30.318 min];  $[\alpha]_D^{25} = +133.8^\circ$  ( $c = 0.75$ ,  $\text{CH}_2\text{Cl}_2$ ).  $^1\text{H NMR}$  (600 MHz, Chloroform-*d*)  $\delta$  8.01 (d,  $J = 2.4 \text{ Hz}$ , 1H), 7.72 (dd,  $J = 8.4, 2.4 \text{ Hz}$ , 1H), 7.55 – 7.51 (m, 2H), 7.14 (d,  $J = 8.4 \text{ Hz}$ , 1H), 7.01 – 6.99 (m, 2H), 6.01 – 5.93 (m, 1H), 5.55 (dt,  $J = 17.2, 1.3 \text{ Hz}$ , 1H), 5.43 (dt,  $J = 10.6, 1.3 \text{ Hz}$ , 1H), 5.11 – 5.06 (m, 1H), 4.45 (dd,  $J = 13.8, 2.9 \text{ Hz}$ , 1H), 4.39 – 4.34 (m, 1H), 3.87 (s, 3H).  $^{13}\text{C NMR}$  (151 MHz, Chloroform-*d*)  $\delta$  169.18, 159.43, 152.45, 136.53, 132.95, 132.18, 131.62, 130.42, 127.87, 122.53, 121.63, 121.17, 119.36, 114.39, 81.51, 67.78, 55.36. HRMS(ESI) calcd for  $\text{C}_{18}\text{H}_{17}\text{O}_4$   $[\text{M}+\text{H}]^+$ : 297.1121, Found: 297.1122.

**(*R*)-7-(3-methoxyphenyl)-2-vinyl-2,3-dihydro-5*H*-benzo[*e*][1,4]dioxepin-5-one (2n)**

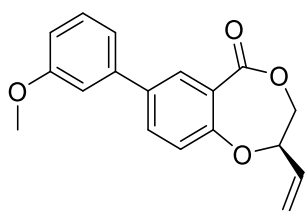

$R_f = 0.30$  (petroleum/EtOAc = 4 : 1, v/v); colorless oil, 85.3 mg, 72% yield; 92% ee [Daicel Chiralcel IC-3 (0.46 cm x 25 cm), *n*-hexane/2-propanol = 65/35,  $\nu = 1.0 \text{ mL} \cdot \text{min}^{-1}$ ,  $T = 25 \text{ }^\circ\text{C}$ ,  $\lambda = 254 \text{ nm}$ ,  $t_R$  (minor) = 18.821 min,  $t_R$  (major) = 25.349 min];  $[\alpha]_D^{25} = +122.2^\circ$  ( $c = 0.75$ ,  $\text{CH}_2\text{Cl}_2$ ).  $^1\text{H NMR}$  (600 MHz, Chloroform-*d*)  $\delta$  8.07 (d,  $J = 2.4 \text{ Hz}$ , 1H), 7.76 (dd,  $J = 8.5, 2.4 \text{ Hz}$ , 1H), 7.40 – 7.36 (m, 1H), 7.20 – 7.14 (m, 2H), 7.12 (t,  $J = 2.1 \text{ Hz}$ , 1H), 6.96 – 6.91 (m, 1H),



6.01 – 5.93 (m, 1H), 5.55 (dt,  $J = 17.2, 1.2$  Hz, 1H), 5.43 (dt,  $J = 10.6, 1.2$  Hz, 1H), 5.14 – 5.08 (m, 1H), 4.46 (dd,  $J = 13.8, 2.9$  Hz, 1H), 4.38 (dd,  $J = 13.8, 7.1$  Hz, 1H), 3.89 (s, 3H).  $^{13}\text{C}$  NMR (151 MHz, Chloroform-*d*)  $\delta$  169.02, 160.10, 153.09, 140.59, 136.67, 133.46, 132.09, 131.16, 129.95, 122.52, 121.43, 119.42, 119.32, 113.17, 112.53, 81.55, 67.80, 55.37. HRMS(ESI) calcd for  $\text{C}_{18}\text{H}_{17}\text{O}_4$   $[\text{M}+\text{H}]^+$ : 297.1121, Found: 297.1121.

**(*R*)-7-(4-(*tert*-butyl)phenyl)-2-vinyl-2,3-dihydro-5*H*-benzo[*e*][1,4]dioxepin-5-one (2o)**

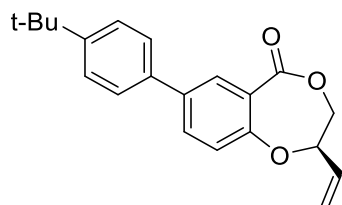

$R_f = 0.45$  (petroleum/EtOAc = 4 : 1, v/v); colorless oil, 104.4 mg, 81% yield; 92% ee [Daicel Chiralcel IC-3 (0.46 cm x 25 cm), *n*-hexane/2-propanol = 65/35,  $v = 1.0 \text{ mL} \cdot \text{min}^{-1}$ ,  $T = 25 \text{ }^\circ\text{C}$ ,  $\lambda = 254 \text{ nm}$ ,  $t_R$  (minor) = 12.235 min,  $t_R$  (major) = 17.568 min];  $[\alpha]_{\text{D}}^{25} = +169.9^\circ$  ( $c = 0.75$ ,  $\text{CH}_2\text{Cl}_2$ ).  $^1\text{H}$  NMR (600 MHz, Chloroform-*d*)  $\delta$  8.07 (d,  $J = 2.4$  Hz, 1H), 7.76 (dd,  $J = 8.4, 2.4$  Hz, 1H), 7.57 – 7.53 (m, 2H), 7.51 – 7.48 (m, 2H), 7.15 (d,  $J = 8.4$  Hz, 1H), 6.01 – 5.94 (m, 1H), 5.55 (dt,  $J = 17.2, 1.2$  Hz, 1H), 5.43 (dt,  $J = 10.5, 1.2$  Hz, 1H), 5.10 (dddt,  $J = 7.3, 5.9, 2.9, 1.3$  Hz, 1H), 4.45 (dd,  $J = 13.8, 2.9$  Hz, 1H), 4.37 (dd,  $J = 13.8, 7.1$  Hz, 1H), 1.39 (s, 9H).  $^{13}\text{C}$  NMR (151 MHz, Chloroform-*d*)  $\delta$  169.11, 152.76, 150.75, 136.69, 136.17, 133.23, 132.19, 130.85, 126.46, 125.88, 122.50, 121.54, 119.37, 81.54, 67.80, 34.57, 31.33. HRMS(ESI) calcd for  $\text{C}_{21}\text{H}_{23}\text{O}_3$   $[\text{M}+\text{H}]^+$ : 323.1642, Found: 323.1641.

**(*R*)-7-(naphthalen-1-yl)-2-vinyl-2,3-dihydro-5*H*-benzo[*e*][1,4]dioxepin-5-one (2p)**

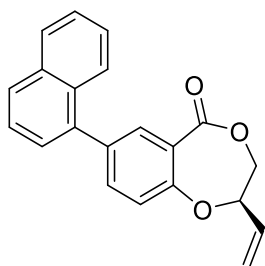

$R_f = 0.40$  (petroleum/EtOAc = 4 : 1, v/v); colorless oil, 92.3 mg, 73% yield; 92% ee [Daicel Chiralcel IC-3 (0.46 cm x 25 cm), *n*-hexane/2-propanol = 65/35,  $\nu = 1.0 \text{ mL} \cdot \text{min}^{-1}$ ,  $T = 25 \text{ }^\circ\text{C}$ ,  $\lambda = 254 \text{ nm}$ ,  $t_R$  (minor) = 14.073 min,  $t_R$  (major) = 20.631 min];  $[\alpha]_D^{25} = +155.3^\circ$  ( $c = 0.75$ ,  $\text{CH}_2\text{Cl}_2$ ).  $^1\text{H NMR}$  (600 MHz, Chloroform-*d*)  $\delta$  8.00 (d,  $J = 2.3 \text{ Hz}$ , 1H), 7.94 (dd,  $J = 8.2, 1.4 \text{ Hz}$ , 1H), 7.90 (d,  $J = 8.3 \text{ Hz}$ , 1H), 7.87 (d,  $J = 8.8 \text{ Hz}$ , 1H), 7.68 (dd,  $J = 8.3, 2.3 \text{ Hz}$ , 1H), 7.56 – 7.51 (m, 2H), 7.50 – 7.46 (m, 1H), 7.44 (dd,  $J = 7.0, 1.3 \text{ Hz}$ , 1H), 7.22 (d,  $J = 8.3 \text{ Hz}$ , 1H), 6.06 – 5.98 (m, 1H), 5.60 (dt,  $J = 17.2, 1.2 \text{ Hz}$ , 1H), 5.46 (dt,  $J = 10.6, 1.2 \text{ Hz}$ , 1H), 5.16 (dddt,  $J = 7.4, 6.0, 3.0, 1.4 \text{ Hz}$ , 1H), 4.52 (dd,  $J = 13.9, 2.9 \text{ Hz}$ , 1H), 4.45 (dd,  $J = 13.8, 7.1 \text{ Hz}$ , 1H).  $^{13}\text{C NMR}$  (151 MHz, Chloroform-*d*)  $\delta$  168.93, 152.98, 138.06, 136.53, 136.28, 133.99, 133.85, 132.17, 131.39, 128.44, 128.17, 127.13, 126.37, 125.45, 125.36, 121.98, 121.17, 119.42, 81.60, 67.86. HRMS(ESI) calcd for  $\text{C}_{21}\text{H}_{17}\text{O}_3$   $[\text{M}+\text{H}]^+$ : 317.1172, Found: 317.1166.

**(*R*)-7-(thiophen-2-yl)-2-vinyl-2,3-dihydro-5*H*-benzo[*e*][1,4]dioxepin-5-one (2q)**

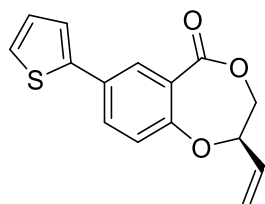

$R_f = 0.40$  (petroleum/EtOAc = 4 : 1, v/v); colorless oil, 74.0 mg, 68% yield; 88% ee [Daicel Chiralcel IC-3 (0.46 cm x 25 cm), *n*-hexane/2-propanol = 65/35,  $\nu = 1.0 \text{ mL} \cdot \text{min}^{-1}$ ,  $T = 25 \text{ }^\circ\text{C}$ ,  $\lambda = 254 \text{ nm}$ ,  $t_R$  (minor) = 15.265 min,  $t_R$  (major) =

18.993 min];  $[\alpha]_{\text{D}}^{25} = +125.8^{\circ}$  ( $c = 0.75$ ,  $\text{CH}_2\text{Cl}_2$ ).  $^1\text{H}$  NMR (600 MHz, Chloroform-*d*)  $\delta$  8.06 (d,  $J = 2.4$  Hz, 1H), 7.75 (dd,  $J = 8.5, 2.4$  Hz, 1H), 7.35 – 7.29 (m, 2H), 7.14 – 7.06 (m, 2H), 5.95 (ddd,  $J = 16.9, 10.6, 6.0$  Hz, 1H), 5.53 (dt,  $J = 17.2, 1.2$  Hz, 1H), 5.42 (dt,  $J = 10.6, 1.2$  Hz, 1H), 5.08 (dddd,  $J = 7.5, 6.1, 3.0, 1.4$  Hz, 1H), 4.44 (dd,  $J = 13.8, 2.9$  Hz, 1H), 4.35 (dd,  $J = 13.8, 7.1$  Hz, 1H).  $^{13}\text{C}$  NMR (151 MHz, Chloroform-*d*)  $\delta$  168.74, 152.85, 142.23, 132.20, 132.01, 130.34, 129.77, 128.17, 125.22, 123.51, 122.70, 121.62, 119.47, 81.56, 67.78. HRMS(ESI) calcd for  $\text{C}_{15}\text{H}_{13}\text{O}_3\text{S}$   $[\text{M}+\text{H}]^+$ : 273.0580, Found: 273.0578.

**(*R*)-7-(benzofuran-2-yl)-2-vinyl-2,3-dihydro-5*H*-benzo[*e*][1,4]dioxepin-5-one (2r)**

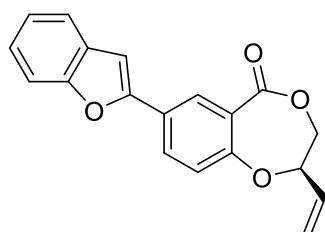

$R_f = 0.40$  (petroleum/EtOAc = 4 : 1, v/v); colorless oil, 77.1 mg, 63% yield; 89% ee [Daicel Chiralcel IC-3 (0.46 cm x 25 cm), *n*-hexane/2-propanol = 65/35,  $\nu = 1.0$  mL $\cdot$ min $^{-1}$ ,  $T = 25$   $^{\circ}\text{C}$ ,  $\lambda = 254$  nm,  $t_R$  (minor) = 16.685 min,  $t_R$  (major) = 20.248 min];  $[\alpha]_{\text{D}}^{25} = +122.7^{\circ}$  ( $c = 0.75$ ,  $\text{CH}_2\text{Cl}_2$ ).  $^1\text{H}$  NMR (600 MHz, Chloroform-*d*)  $\delta$  8.35 (d,  $J = 2.3$  Hz, 1H), 8.02 (dd,  $J = 8.5, 2.3$  Hz, 1H), 7.63 – 7.60 (m, 1H), 7.55 – 7.52 (m, 1H), 7.34 – 7.30 (m, 1H), 7.28 – 7.24 (m, 1H), 7.18 (d,  $J = 8.5$  Hz, 1H), 7.04 (d,  $J = 0.9$  Hz, 1H), 5.97 (ddd,  $J = 16.9, 10.6, 6.0$  Hz, 1H), 5.56 (dt,  $J = 17.3, 1.2$  Hz, 1H), 5.44 (dt,  $J = 10.6, 1.2$  Hz, 1H), 5.13 (dddd,  $J = 7.3, 5.8, 2.9, 1.4$  Hz, 1H), 4.48 (dd,  $J = 13.9, 2.7$  Hz, 1H), 4.40 (dd,  $J = 13.9, 7.0$  Hz, 1H).  $^{13}\text{C}$  NMR (151 MHz, Chloroform-*d*)  $\delta$  168.57, 154.93, 154.09, 153.69, 131.90, 131.09, 129.47, 129.06, 126.31, 124.56, 123.12, 122.63, 121.32, 121.03, 119.53, 111.21, 101.61, 81.63, 67.85. HRMS(ESI) calcd for  $\text{C}_{19}\text{H}_{15}\text{O}_4$   $[\text{M}+\text{H}]^+$ : 307.0965, Found: 307.0966.

**(R)-7-(furan-2-yl)-2-vinyl-2,3-dihydro-5H-benzo[e][1,4]dioxepin-5-one (2s)**

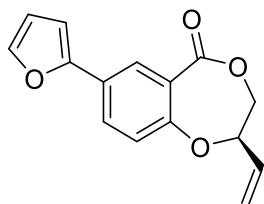

$R_f = 0.40$  (petroleum/EtOAc = 4 : 1, v/v); colorless oil, 74.8 mg, 73% yield; 90% ee [Daicel Chiralcel IC-3 (0.46 cm x 25 cm), *n*-hexane/2-propanol = 65/35,  $\nu = 1.0 \text{ mL} \cdot \text{min}^{-1}$ ,  $T = 25 \text{ }^\circ\text{C}$ ,  $\lambda = 254 \text{ nm}$ ,  $t_R$  (minor) = 16.215 min,  $t_R$  (major) = 20.156 min];  $[\alpha]_D^{25} = +121.1^\circ$  ( $c = 0.75$ ,  $\text{CH}_2\text{Cl}_2$ ).  $^1\text{H NMR}$  (600 MHz, Chloroform-*d*)  $\delta$  8.10 (d,  $J = 2.4 \text{ Hz}$ , 1H), 7.82 (dd,  $J = 8.5, 2.3 \text{ Hz}$ , 1H), 7.47 (d,  $J = 1.6 \text{ Hz}$ , 1H), 7.10 (d,  $J = 8.5 \text{ Hz}$ , 1H), 6.68 – 6.63 (m, 1H), 6.48 (dd,  $J = 3.4, 1.8 \text{ Hz}$ , 1H), 5.94 (ddd,  $J = 16.9, 10.6, 6.0 \text{ Hz}$ , 1H), 5.52 (dt,  $J = 17.2, 1.3 \text{ Hz}$ , 1H), 5.41 (dt,  $J = 10.6, 1.2 \text{ Hz}$ , 1H), 5.07 (dddt,  $J = 7.3, 5.9, 2.9, 1.4 \text{ Hz}$ , 1H), 4.43 (dd,  $J = 13.8, 2.9 \text{ Hz}$ , 1H), 4.33 (dd,  $J = 13.8, 7.1 \text{ Hz}$ , 1H).  $^{13}\text{C NMR}$  (151 MHz, Chloroform-*d*)  $\delta$  168.82, 152.62, 152.24, 142.37, 132.04, 130.05, 127.91, 126.92, 122.56, 121.59, 119.43, 111.79, 105.36, 81.55, 67.77. HRMS(ESI) calcd for  $\text{C}_{15}\text{H}_{13}\text{O}_4$   $[\text{M}+\text{H}]^+$ : 257.0808, Found: 257.0808.

**(R)-7-(4-(benzyloxy)phenyl)-2-vinyl-2,3-dihydro-5H-benzo[e][1,4]dioxepin-5-one (2t)**

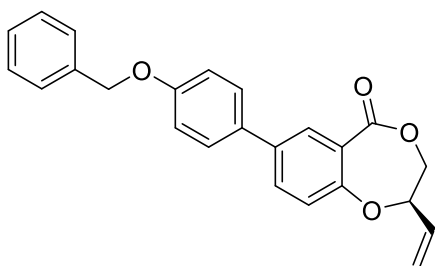

$R_f = 0.20$  (petroleum/EtOAc = 4 : 1, v/v); colorless oil, 105.7 mg, 71% yield; 93% ee [Daicel Chiralcel IC-3 (0.46 cm x 25 cm), *n*-hexane/2-propanol = 65/35,  $\nu =$

1.0 mL•min<sup>-1</sup>, T = 25 °C, λ = 254 nm, t<sub>R</sub> (minor) = 23.267 min, t<sub>R</sub> (major) = 34.316 min]; [α]<sub>D</sub><sup>25</sup> = +156.4° (c = 0.75, CH<sub>2</sub>Cl<sub>2</sub>). <sup>1</sup>H NMR (600 MHz, Chloroform-*d*) δ 8.01 (d, *J* = 2.5 Hz, 1H), 7.72 (dd, *J* = 8.5, 2.5 Hz, 1H), 7.53 (d, *J* = 8.5 Hz, 2H), 7.48 (d, *J* = 7.7 Hz, 2H), 7.43 (t, *J* = 7.6 Hz, 2H), 7.36 (t, *J* = 7.4 Hz, 1H), 7.14 (d, *J* = 8.5 Hz, 1H), 7.07 (d, *J* = 8.6 Hz, 2H), 6.02 – 5.92 (m, 1H), 5.55 (d, *J* = 17.2 Hz, 1H), 5.43 (d, *J* = 10.6 Hz, 1H), 5.14 (s, 2H), 5.10 (d, *J* = 7.2 Hz, 1H), 4.45 (dd, *J* = 13.8, 2.9 Hz, 1H), 4.36 (dd, *J* = 13.8, 7.2 Hz, 1H). <sup>13</sup>C NMR (151 MHz, CDCl<sub>3</sub>) δ 169.09, 158.64, 152.50, 136.88, 136.49, 132.95, 132.19, 131.92, 130.53, 128.60, 128.01, 127.90, 127.45, 122.49, 121.57, 119.35, 115.37, 81.51, 70.16, 67.79. HRMS(ESI) calcd for C<sub>24</sub>H<sub>21</sub>O<sub>4</sub> [M+H]<sup>+</sup>: 373.1434, Found: 373.1435.

**(*R*)-2-vinyl-2,3-dihydro-5*H*-naphtho[2,3-*e*][1,4]dioxepin-5-one (2u)**

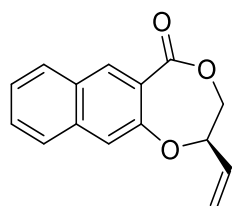

R<sub>f</sub> = 0.45 (petroleum/EtOAc = 4 : 1, v/v); colorless oil, 80.7 mg, 84% yield; 92% ee [Daicel Chiralcel IC-3 (0.46 cm x 25 cm), *n*-hexane/2-propanol = 65/35, ν = 1.0 mL•min<sup>-1</sup>, T = 25 °C, λ = 254 nm, t<sub>R</sub> (minor) = 19.214 min, t<sub>R</sub> (major) = 22.156 min]; [α]<sub>D</sub><sup>25</sup> = +138.9° (c = 0.75, CH<sub>2</sub>Cl<sub>2</sub>). <sup>1</sup>H NMR (600 MHz, Chloroform-*d*) δ 8.35 (s, 1H), 7.93 (d, *J* = 8.2 Hz, 1H), 7.81 (d, *J* = 8.3 Hz, 1H), 7.60 (ddd, *J* = 8.2, 6.8, 1.3 Hz, 1H), 7.51 (q, *J* = 2.5, 1.4 Hz, 2H), 6.00 (ddd, *J* = 17.2, 10.6, 6.7 Hz, 1H), 5.55 (dd, *J* = 17.3, 1.3 Hz, 1H), 5.43 (dd, *J* = 10.5, 1.3 Hz, 1H), 5.05 (td, *J* = 7.0, 3.6 Hz, 1H), 4.41 (dd, *J* = 13.8, 3.8 Hz, 1H), 4.26 (dd, *J* = 13.7, 7.7 Hz, 1H). <sup>13</sup>C NMR (151 MHz, Chloroform-*d*) δ 169.30, 148.92, 136.54, 133.62, 132.29, 130.08, 128.94, 128.85, 127.00, 126.05, 124.29, 119.76, 119.46, 81.56, 67.40. HRMS(ESI) calcd for C<sub>15</sub>H<sub>13</sub>O<sub>3</sub> [M+H]<sup>+</sup>: 241.0859, Found:

241.0858.

**(R)-2-vinyl-2,3-dihydro-5H-naphtho[1,2-e][1,4]dioxepin-5-one (2v)**

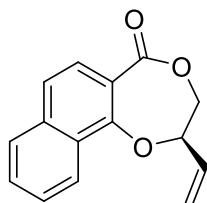

$R_f = 0.45$  (petroleum/EtOAc = 4 : 1, v/v); colorless oil, 46.1 mg, 48% yield; 83% ee [Daicel Chiralcel IC-3 (0.46 cm x 25 cm), *n*-hexane/2-propanol = 65/35,  $\nu = 1.0 \text{ mL} \cdot \text{min}^{-1}$ ,  $T = 25 \text{ }^\circ\text{C}$ ,  $\lambda = 254 \text{ nm}$ ,  $t_R$  (minor) = 14.369 min,  $t_R$  (major) = 20.983 min];  $[\alpha]_D^{25} = +110.8^\circ$  ( $c = 0.75$ ,  $\text{CH}_2\text{Cl}_2$ ).  $^1\text{H NMR}$  (600 MHz, Chloroform-*d*)  $\delta$  8.32 (dd,  $J = 8.6, 1.1 \text{ Hz}$ , 1H), 8.01 (d,  $J = 8.8 \text{ Hz}$ , 1H), 7.90 – 7.85 (m, 1H), 7.62 (ddd,  $J = 8.5, 6.9, 1.3 \text{ Hz}$ , 1H), 7.52 (ddd,  $J = 8.1, 6.9, 1.2 \text{ Hz}$ , 1H), 7.23 (d,  $J = 8.8 \text{ Hz}$ , 1H), 5.96 (ddd,  $J = 17.3, 10.6, 6.7 \text{ Hz}$ , 1H), 5.53 (dt,  $J = 17.3, 1.1 \text{ Hz}$ , 1H), 5.42 (dt,  $J = 10.6, 1.0 \text{ Hz}$ , 1H), 5.13 – 5.08 (m, 1H), 4.40 (dd,  $J = 13.5, 4.1 \text{ Hz}$ , 1H), 4.29 (dd,  $J = 13.4, 7.7 \text{ Hz}$ , 1H).  $^{13}\text{C NMR}$  (151 MHz, Chloroform-*d*)  $\delta$  168.14, 151.74, 134.52, 132.42, 131.84, 131.07, 128.35, 128.24, 125.78, 125.14, 122.04, 119.87, 118.39, 82.20, 66.68. HRMS(ESI) calcd for  $\text{C}_{15}\text{H}_{13}\text{O}_3$   $[\text{M}+\text{H}]^+$ : 241.0859, Found: 241.0858.

**(R)-8-phenyl-2-vinyl-2,3-dihydro-5H-benzo[e][1,4]dioxepin-5-one (2w)**

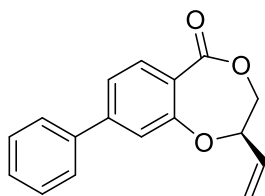

$R_f = 0.40$  (petroleum/EtOAc = 4 : 1, v/v); colorless oil, 71.3 mg, 67% yield; 90% ee [Daicel Chiralcel IA-3 (0.46 cm x 25 cm), *n*-hexane/2-propanol = 95/5,  $\nu = 1.0 \text{ mL} \cdot \text{min}^{-1}$ ,  $T = 25 \text{ }^\circ\text{C}$ ,  $\lambda = 254 \text{ nm}$ ,  $t_R$  (minor) = 17.173 min,  $t_R$  (major) =

17.827 min];  $[\alpha]_{\text{D}}^{25} = +135.6^{\circ}$  ( $c = 0.75$ ,  $\text{CH}_2\text{Cl}_2$ ).  $^1\text{H}$  NMR (600 MHz, Chloroform-*d*)  $\delta$  7.92 (d,  $J = 8.1$  Hz, 1H), 7.63 (d,  $J = 7.6$  Hz, 2H), 7.49 (t,  $J = 7.5$  Hz, 2H), 7.43 (dd,  $J = 11.3, 7.9$  Hz, 2H), 7.32 (s, 1H), 5.98 (ddd,  $J = 17.0, 10.7, 6.0$  Hz, 1H), 5.56 (d,  $J = 17.2$  Hz, 1H), 5.42 (d,  $J = 10.6$  Hz, 1H), 5.12 (d,  $J = 6.8$  Hz, 1H), 4.45 (dd,  $J = 13.9, 2.6$  Hz, 1H), 4.37 (dd,  $J = 13.9, 7.0$  Hz, 1H). HRMS(ESI) calcd for  $\text{C}_{17}\text{H}_{15}\text{O}_3$   $[\text{M}+\text{H}]^+$ : 267.1016, Found: 267.1010.

**(*R*)-8-(thiophen-2-yl)-2-vinyl-2,3-dihydro-5H-benzo[e][1,4]dioxepin-5-one**  
**(2x)**

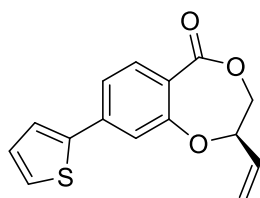

$R_f = 0.40$  (petroleum/EtOAc = 4 : 1, v/v); colorless oil, 79.4 mg, 73% yield; 90% ee [Daicel Chiralcel IC-3 (0.46 cm x 25 cm), *n*-hexane/2-propanol = 65/35,  $v = 1.0$  mL $\cdot$ min $^{-1}$ ,  $T = 25$   $^{\circ}\text{C}$ ,  $\lambda = 254$  nm,  $t_R$  (minor) = 18.535 min,  $t_R$  (major) = 21.395 min];  $[\alpha]_{\text{D}}^{25} = +117.8^{\circ}$  ( $c = 0.75$ ,  $\text{CH}_2\text{Cl}_2$ ).  $^1\text{H}$  NMR (600 MHz, Chloroform-*d*)  $\delta$  7.86 (d,  $J = 8.1$  Hz, 1H), 7.46 – 7.38 (m, 3H), 7.31 (d,  $J = 1.8$  Hz, 1H), 7.13 (t,  $J = 4.4$  Hz, 1H), 5.97 (ddd,  $J = 16.9, 10.6, 6.0$  Hz, 1H), 5.58 – 5.52 (m, 1H), 5.45 – 5.40 (m, 1H), 5.09 (tt,  $J = 5.2, 2.1$  Hz, 1H), 4.44 (dd,  $J = 13.9, 2.7$  Hz, 1H), 4.36 (dd,  $J = 13.9, 6.9$  Hz, 1H).  $^{13}\text{C}$  NMR (151 MHz, Chloroform-*d*)  $\delta$  168.66, 154.29, 141.96, 140.94, 133.79, 132.08, 128.38, 126.81, 125.02, 120.61, 119.44, 119.08, 118.45, 81.50, 67.87. HRMS(ESI) calcd for  $\text{C}_{15}\text{H}_{13}\text{O}_3\text{S}$   $[\text{M}+\text{H}]^+$ : 273.0580, Found: 273.0574.

### 3.3 Control Experiments on Kinetic Resolution

To gain insight into the possible reaction mechanism, the Ir-catalyzed asymmetric cascade allylic etherification/lactonization between methyl salicylate **1a** (0.2 mmol) and excessive racemic VEC (0.4 mmol) was further investigated, and it was found **2a** could be available in 82% yield with 95% *ee*, accompanied by recovered VEC in 40% yield with 90% *ee*. These results display that racemic VEC should go through a kinetic resolution (KR) process in this transformation.

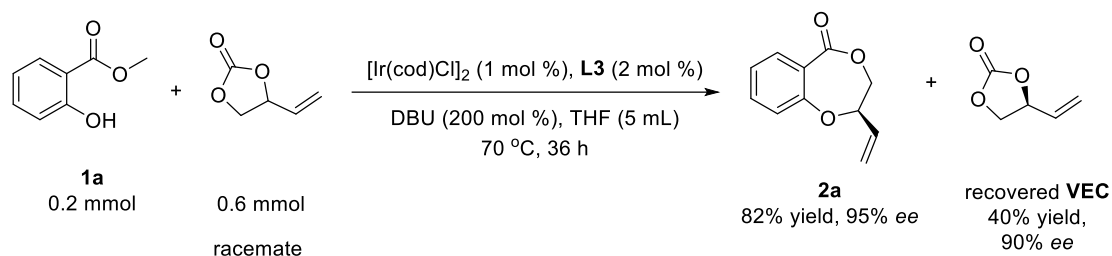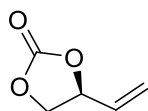

**(S)-4-vinyl-1,3-dioxolan-2-one:** 18.2 mg (based on the substrate racemic VEC), colorless oil. The recovered VEC was analyzed by GC to determine the enantiomeric excess: 90% *ee*.

GC (Beta DEX-390, N<sub>2</sub> flow rate 1.0 mL/min, 20 min at 150 °C):  $t_R = 6.69$  min (minor), 7.13 min (major), 90% *ee*. The NMR data are in accordance with the previously reported data.<sup>[3]</sup>

**GC chromatogram of compound (S)-4-vinyl-1,3-dioxolan-2-one:**



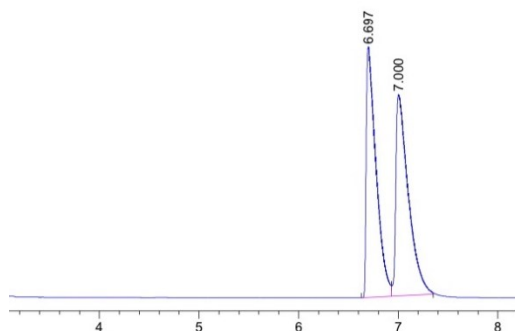

| Peak # | RetTime [min] | Type | Width (min) | Area [pA*s] | Height [pA] | Area %   |
|--------|---------------|------|-------------|-------------|-------------|----------|
| 1      | 6.697         | BV   | 0.0900      | 1091.50562  | 159.24478   | 49.45939 |
| 2      | 7.000         | VB   | 0.1157      | 1115.36682  | 127.99700   | 50.54061 |

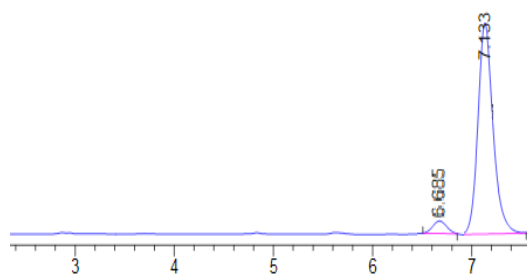

| Peak # | RetTime [min] | Type | Width (min) | Area [pA*s] | Height [pA] | Area %   |
|--------|---------------|------|-------------|-------------|-------------|----------|
| 1      | 6.685         | BV   | 0.0915      | 76.89745    | 12.46783    | 5.07525  |
| 2      | 7.133         | VB   | 0.1326      | 1438.24825  | 139.25687   | 94.92475 |

### 3.4 Stepwise Experiments: Investigation of the Reaction Pathways

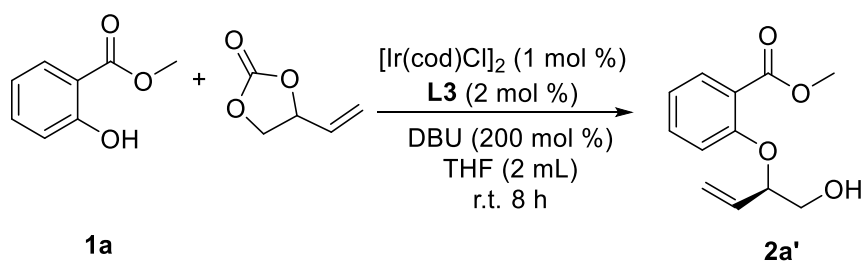

In a dry Schlenk tube filled with argon,  $[\text{Ir}(\text{cod})\text{Cl}]_2$  (2.7 mg, 0.004 mmol, 1 mol %), phosphoramidite ligand **L3** (4.2 mg, 0.008 mmol, 2 mol %), and *n*-propylamine (0.5 mL) were dissolved in THF (1.0 mL). The reaction mixture was heated at 50 °C for 30 min and then the volatile solvents were removed in vacuum to give a yellow solid. Subsequently, (substituted) methyl salicylate **1** (0.4 mmol), VEC **2** (137.0 mg, 3.0 equiv.), DBU (121.8 mg, 200 mol %) and THF (5.0 mL) were added to this tube. The system was stirred at room temperature until the reaction was completed. Then the solvent was evaporated and the residue was purified by silica gel column chromatography using petroleum/EtOAc (5:1) as the eluent to give the desired products **2a'**.

**(*R*)-methyl 2-((1-hydroxybut-3-en-2-yl)oxy)benzoate (**2a'**)**

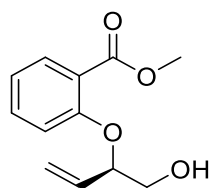

$R_f = 0.30$  (petroleum/EtOAc = 4 : 1, v/v); colorless oil, 77.3 mg, 87% yield; 86% ee [Daicel Chiralcel IC-3 (0.46 cm x 25 cm), *n*-hexane/2-propanol = 65/35,  $\nu = 1.0 \text{ mL} \cdot \text{min}^{-1}$ ,  $T = 25 \text{ }^\circ\text{C}$ ,  $\lambda = 254 \text{ nm}$ ,  $t_R$  (major) = 7.989 min,  $t_R$  (minor) = 8.382 min];  $[\alpha]_D^{25} = 89.3^\circ$  ( $c = 0.75$ ,  $\text{CH}_2\text{Cl}_2$ ).  $^1\text{H NMR}$  (600 MHz, Chloroform-*d*)  $\delta$  7.81 (dd,  $J = 7.8, 1.8 \text{ Hz}$ , 1H), 7.47 – 7.42 (m, 1H), 7.08 (dd,  $J = 8.3, 1.0 \text{ Hz}$ , 1H), 7.05 – 7.01 (m, 1H), 6.00 (ddd,  $J = 17.4, 10.8, 5.5 \text{ Hz}$ , 1H), 5.50 – 5.44 (m, 1H), 5.39 – 5.34 (m, 1H), 4.75 – 4.69 (m, 1H), 3.92 (s, 3H), 3.79 (dd,  $J = 11.9, 8.6 \text{ Hz}$ , 1H), 3.73 (dd,  $J = 12.0, 3.4 \text{ Hz}$ , 1H).  $^{13}\text{C NMR}$  (151 MHz, Chloroform-*d*)  $\delta$  167.06, 159.41, 134.40, 133.81, 131.41, 121.31, 120.63, 118.04, 116.90, 84.60, 65.45, 52.21. HRMS(ESI) calcd for  $\text{C}_{12}\text{H}_{15}\text{O}_4$   $[\text{M}+\text{H}]^+$ : 223.0965, Found: 223.0964.

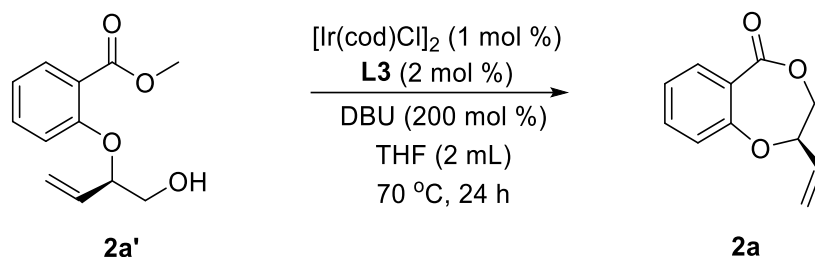

In a dry Schlenk tube filled with argon,  $[\text{Ir}(\text{cod})\text{Cl}]_2$  (1.4 mg, 0.002 mmol, 1 mol %), phosphoramidite ligand **L3** (2.1 mg, 0.004 mmol, 2 mol %), and *n*propylamine (0.5 mL) were dissolved in THF (1.0 mL). The reaction mixture was heated at 50 °C for 30 min and then the volatile solvents were removed in vacuum to give a yellow solid. Subsequently, **2a'** (44.4 mg, 0.2 mmol), DBU (60.9 mg, 200 mol %) and THF (2.0 mL) were added to this tube. The system was stirred at 70 °C until the reaction was completed. Then the solvent was evaporated and the residue was purified by silica gel column chromatography using petroleum/EtOAc (8:1) as the eluent to give the desired products **2a** (82% yield, 83% *ee*).

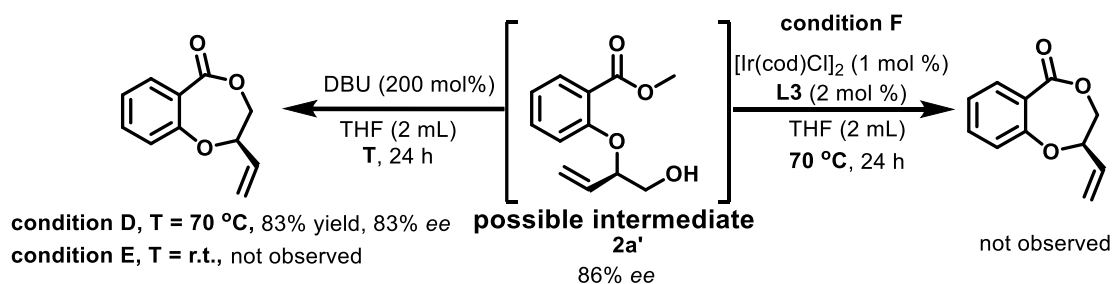

Intermediate **2a'** reacted under condition E (room temperature) and condition F (no DBU added), condition D (without Ir complex) in a similar way as above. Further control experiments showed that when intermediate **2a'** reacted under condition E (room temperature) and condition F (no DBU added), the corresponding product **2a** could not be obtained. However, **2a** could be conveniently given when intermediate **2a'** was exposed to condition D (without Ir complex). From the results obtained in the one-pot reaction (condition C) and

the stepwise experiments, it can be concluded that the reaction proceeds through a relay catalytic pathway and DBU catalyzes the lactonization step at 70 °C.

## References

- [1] (a) Arnold, L. A.; Naasz, R.; Minnaard, A. J.; Feringa, B. L. Catalytic Enantioselective Synthesis of Prostaglandin E1 Methyl Ester Using a Tandem 1,4-Addition-Aldol Reaction to a Cyclopenten-3,5-dione Monoacetal. *J. Am. Chem. Soc.* **2001**, *123*, 5841–5842. (b) Defieber, C.; Ariger, M. A.; Moriel, P.; Carreira, E. M. Iridium-Catalyzed Synthesis of Primary Allylic Amines from Allylic Alcohols: Sulfamic Acid as Ammonia Equivalent. *Angew. Chem. Int. Ed.* **2007**, *46*, 3139–3143. (c) Zhuang, Y.; He, Y.; Zhou, Z.; Xia, W.; Cheng, C.; Wang, M.; Chen, B.; Zhou, Z.; Pang, J.; Qiu, L. Synthesis of a Class of Chiral-Bridged Phosphoramidite Ligands and Their Applications in the First Iridium-Catalyzed Asymmetric Addition of Arylboronic Acids to Isatins. *J. Org. Chem.* **2015**, *80*, 6968–6975. (d) Jiang, X.; Chen, X.; Li, Y.; Liang, H.; Zhang, Y.; He, X.; Chen, B.; Chan, W. T. K.; Chan, A. S. C.; Qiu, L. Enantioselective Syntheses of Tricyclic Benzimidazoles via Intramolecular Allylic Aminations with Chiral-Bridged Biphenyl Phosphoramidite Ligands, *Org. Lett.* **2019**, *21*, 608–613.
- [2] (a) Schulz, J.; Cisařová, I.; Štěpnička, P. Preparation, Coordination Properties and Catalytic Use of 1'-((Diphenylphosphanyl)-1-Ferrocenecarboxamides Bearing 2-Hydroxyethyl Pendant Groups. *J. Organometall. Chem.* **2009**, *694*, 2519–2530. (b) Petros, A.; Swann, S.; Song, D.; Swinger, K.; Park, C.; Zhang, H.; Wendt, M.; Kunzer, A.; Souers, A.; Sun, C. Fragment-Based Discovery of Potent Inhibitors of the Anti-Apoptotic MCL-1 Protein. *Bioorg. Med. Chem. Lett.* **2014**, *24*, 1484–1488. (c) Gu, Y.; Wu, F.; Yang, J. Oxidative [3+3] Annulation of Atropaldehyde Acetals with 1,3-Bisnucleophiles: An Efficient Method of Constructing Six-Membered Aromatic Rings, Including Salicylates and Carbazoles. *Adv. Synth. Catal.* **2018**, *360*, 2727–

2741. (d) Prévost, S.; Dezaire, A.; Escargueil, A. Intramolecular Aryne-Furan Cycloadditions for the Synthesis of Anticancer Naphthalimides. *J. Org. Chem.* **2018**, *83*, 4871–4881.

[3] Xiao, L.; Wei, L.; Wang, C.-J. Stereodivergent Synthesis of Enantioenriched  $\gamma$ Butyrolactones Bearing Two Vicinal Stereocenters Enabled by Synergistic Copper and Iridium Catalysis. *Angew. Chem., Int. Ed.* **2021**, *60*, 24930–24940.

## 4. Copies of NMR Spectra

Figure 1.  $^1\text{H}$  NMR (600 MHz,  $\text{CDCl}_3$ ) spectrum of 1q

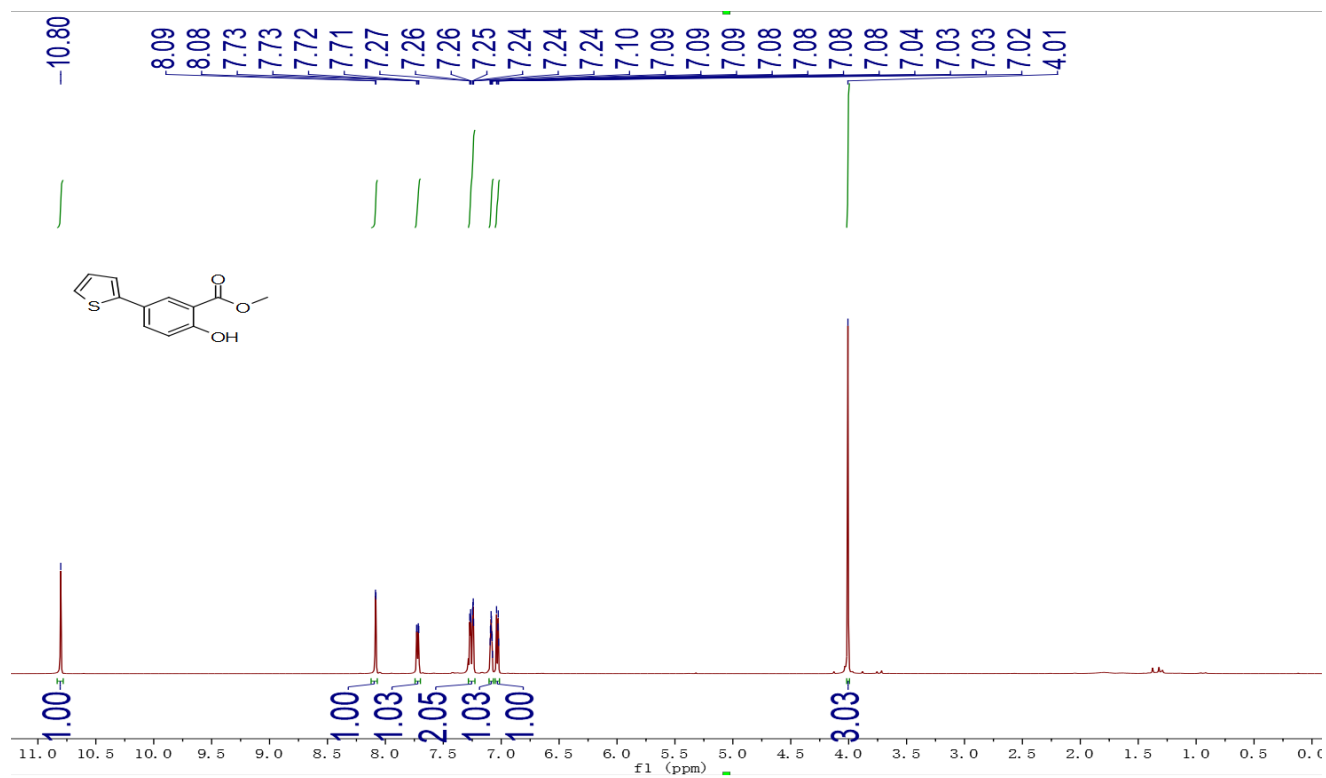

Figure 2.  $^{13}\text{C}$  NMR (151 MHz,  $\text{CDCl}_3$ ) spectrum of 1q

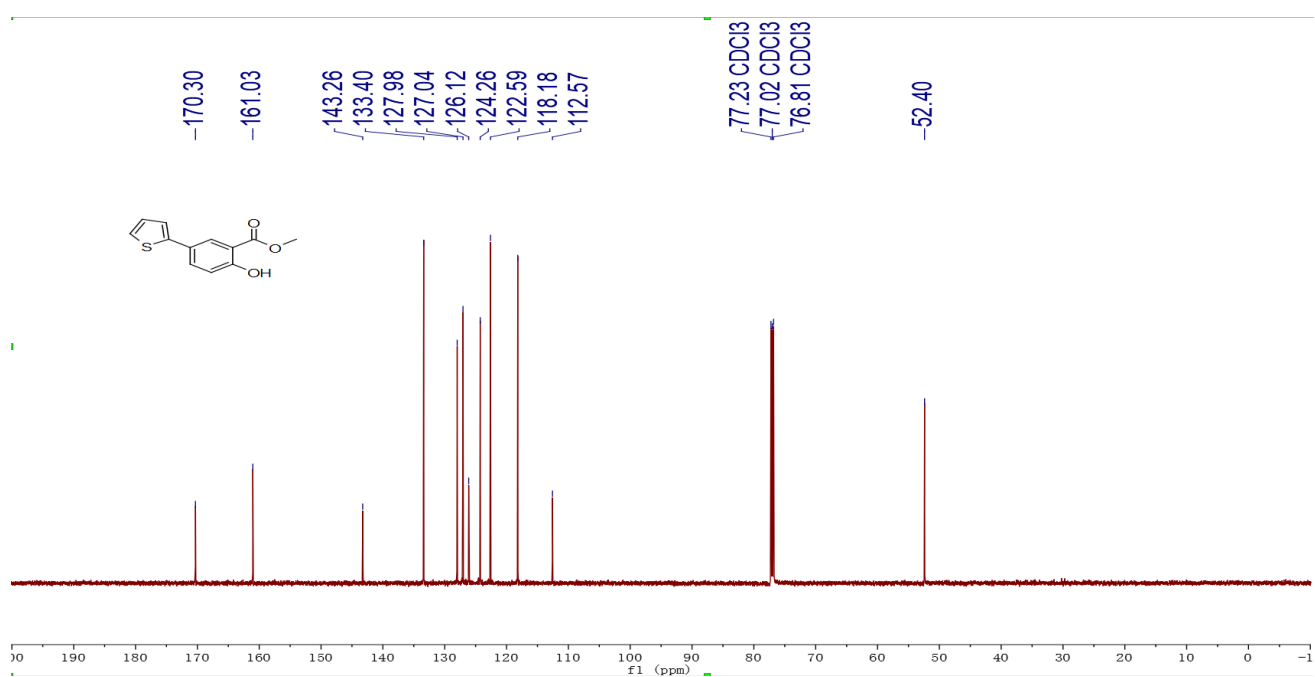

Figure 3.  $^1\text{H}$  NMR (600 MHz,  $\text{CDCl}_3$ ) spectrum of 1r

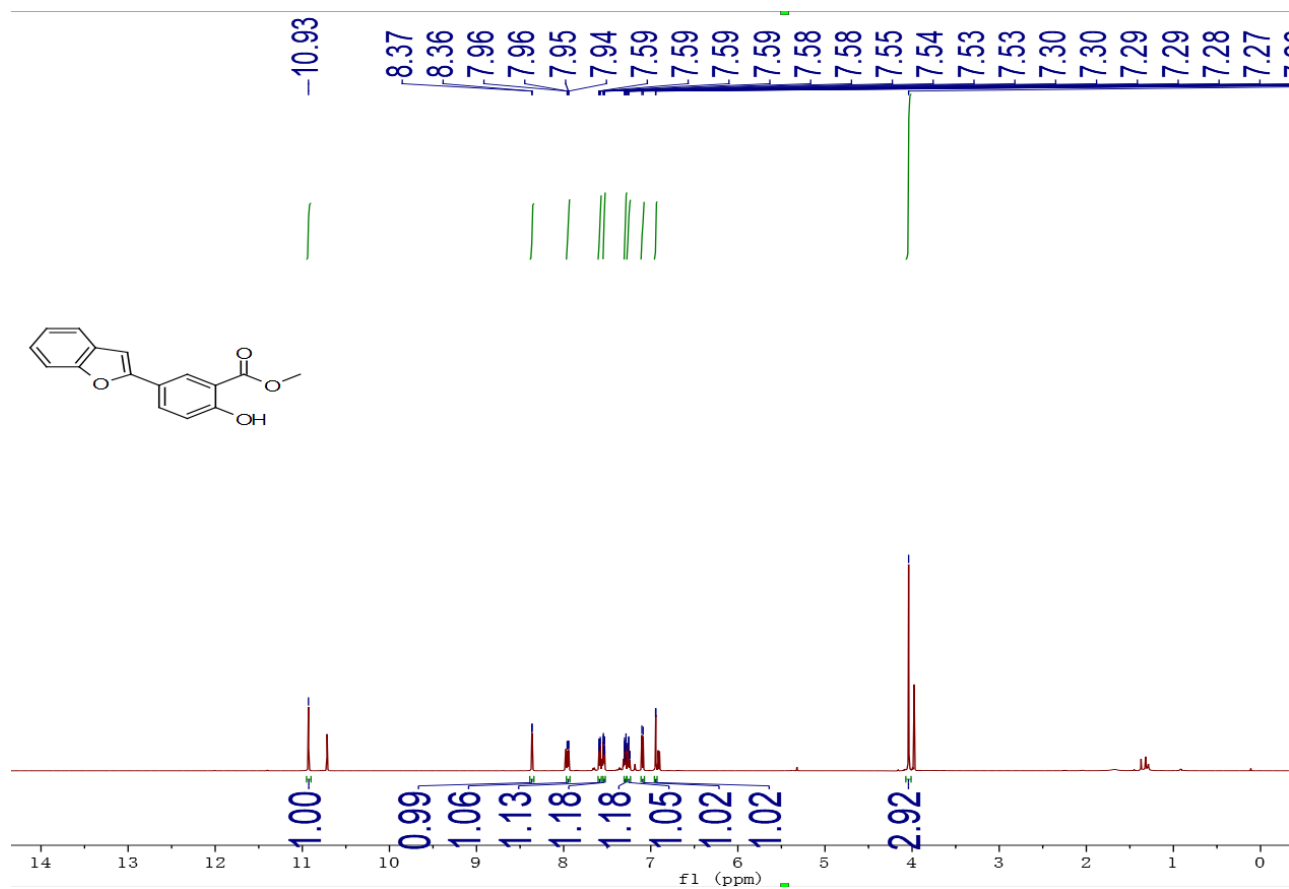

Figure 4.  $^{13}\text{C}$  NMR (151 MHz,  $\text{CDCl}_3$ ) spectrum of 1r

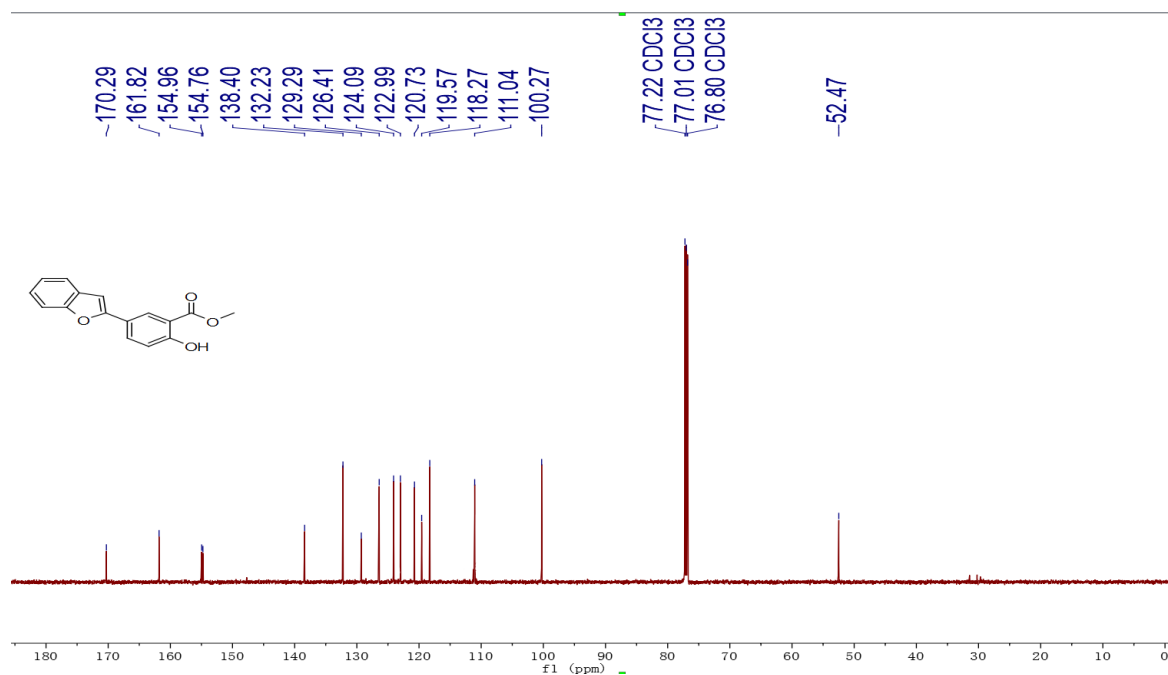

Figure 5.  $^1\text{H}$  NMR (600 MHz,  $\text{CDCl}_3$ ) spectrum of **1s**

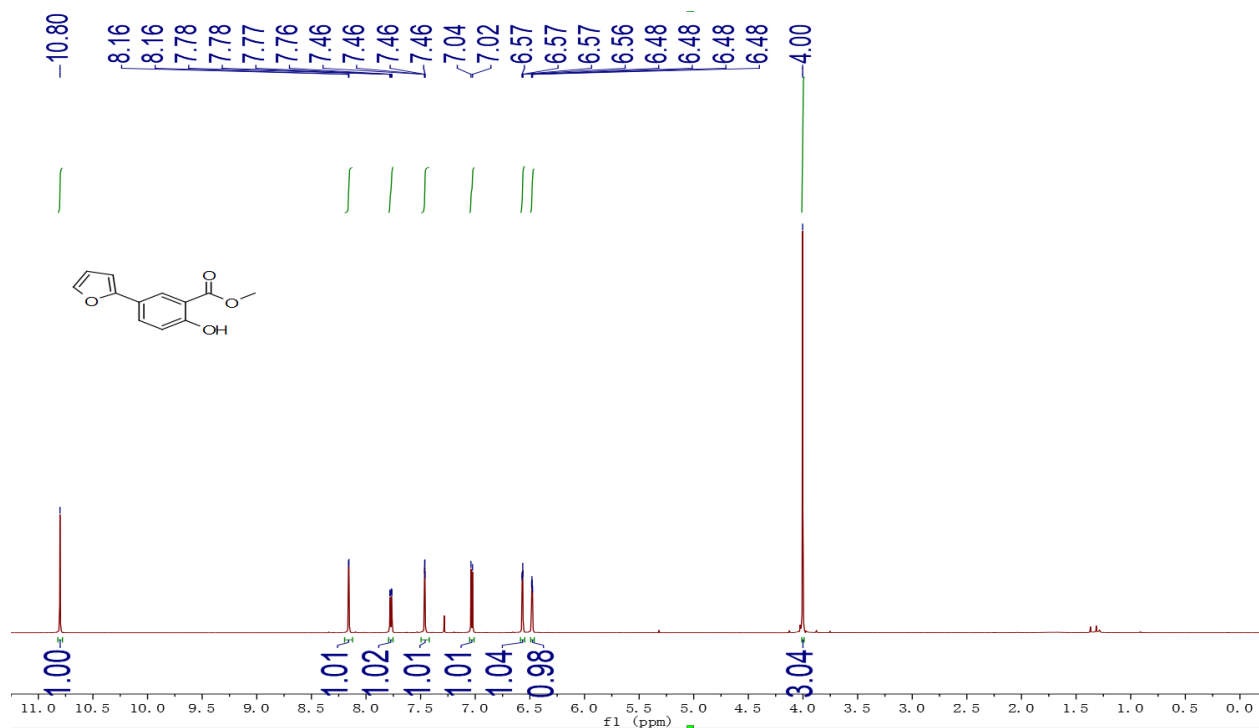

Figure 6.  $^{13}\text{C}$  NMR (151 MHz,  $\text{CDCl}_3$ ) spectrum of **1s**

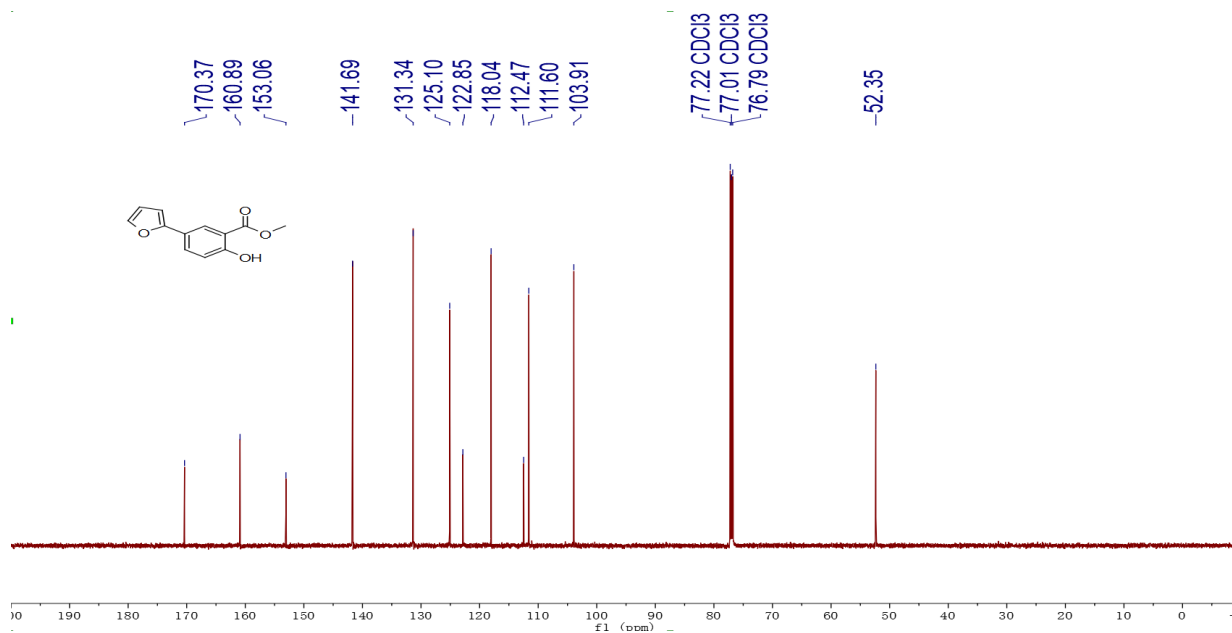



Figure 7.  $^1\text{H}$  NMR (600 MHz,  $\text{CDCl}_3$ ) spectrum of 1t

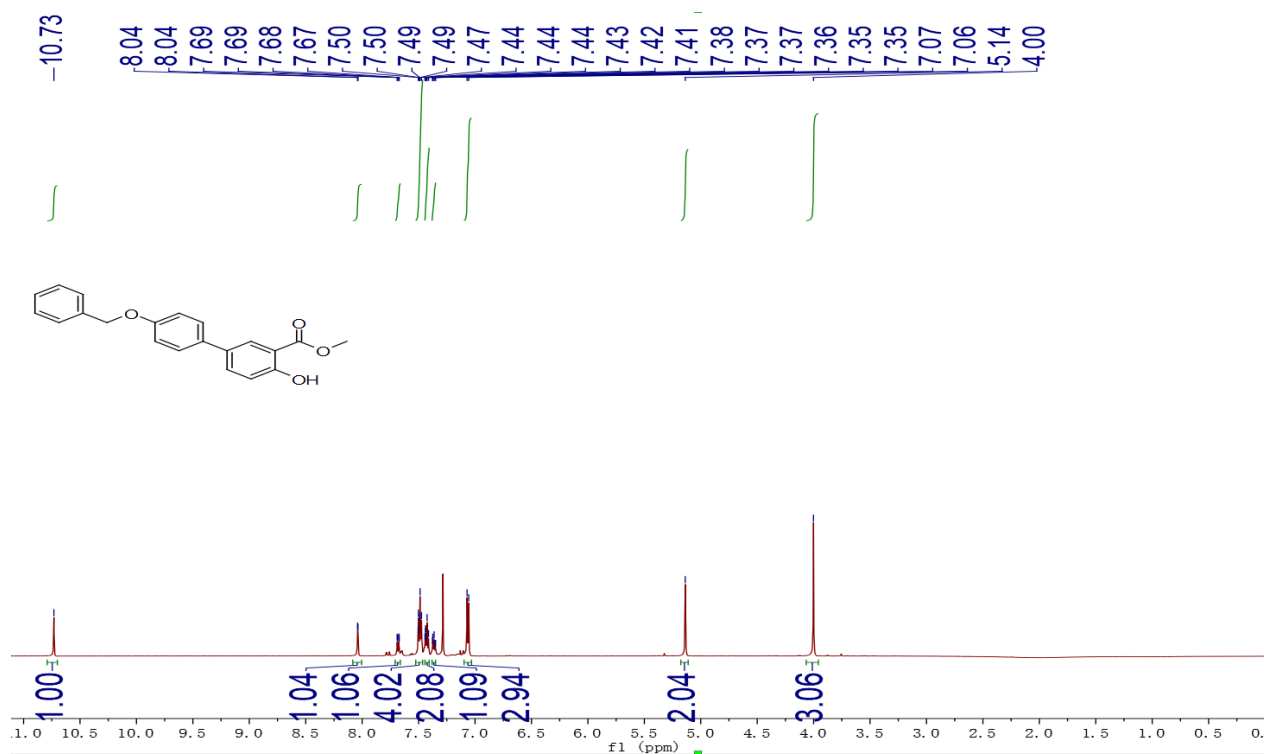

Figure 8.  $^{13}\text{C}$  NMR (151 MHz,  $\text{CDCl}_3$ ) spectrum of 1t

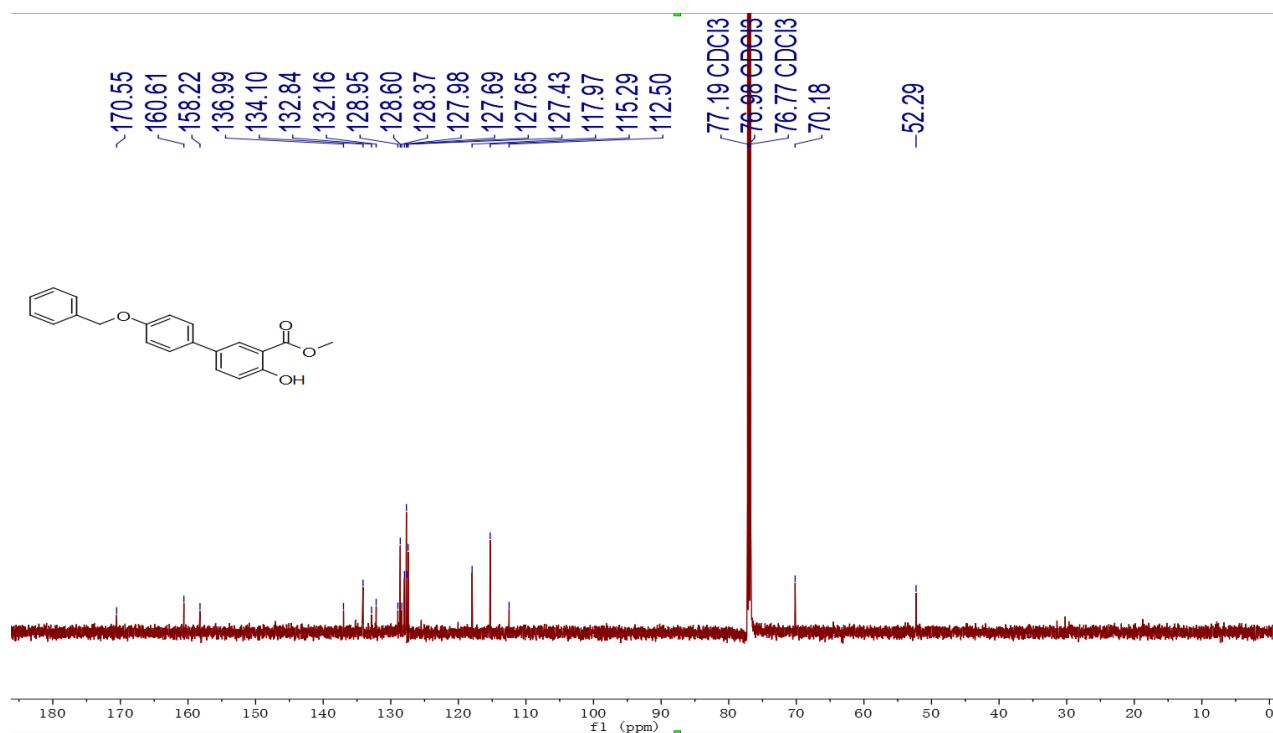

Figure 9. <sup>1</sup>H NMR (600 MHz, CDCl<sub>3</sub>) spectrum of 2a

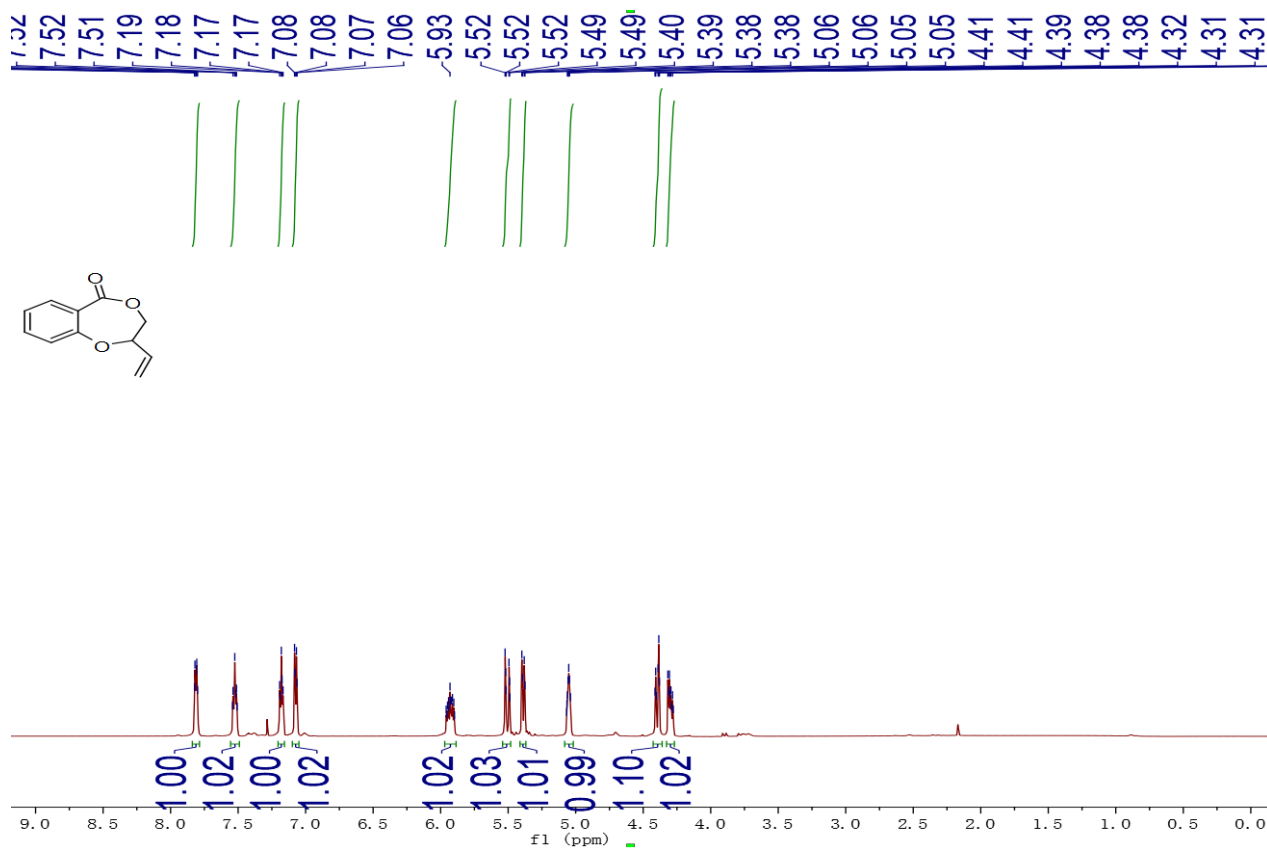

Figure 10. <sup>13</sup>C NMR (151 MHz, CDCl<sub>3</sub>) spectrum of 2a

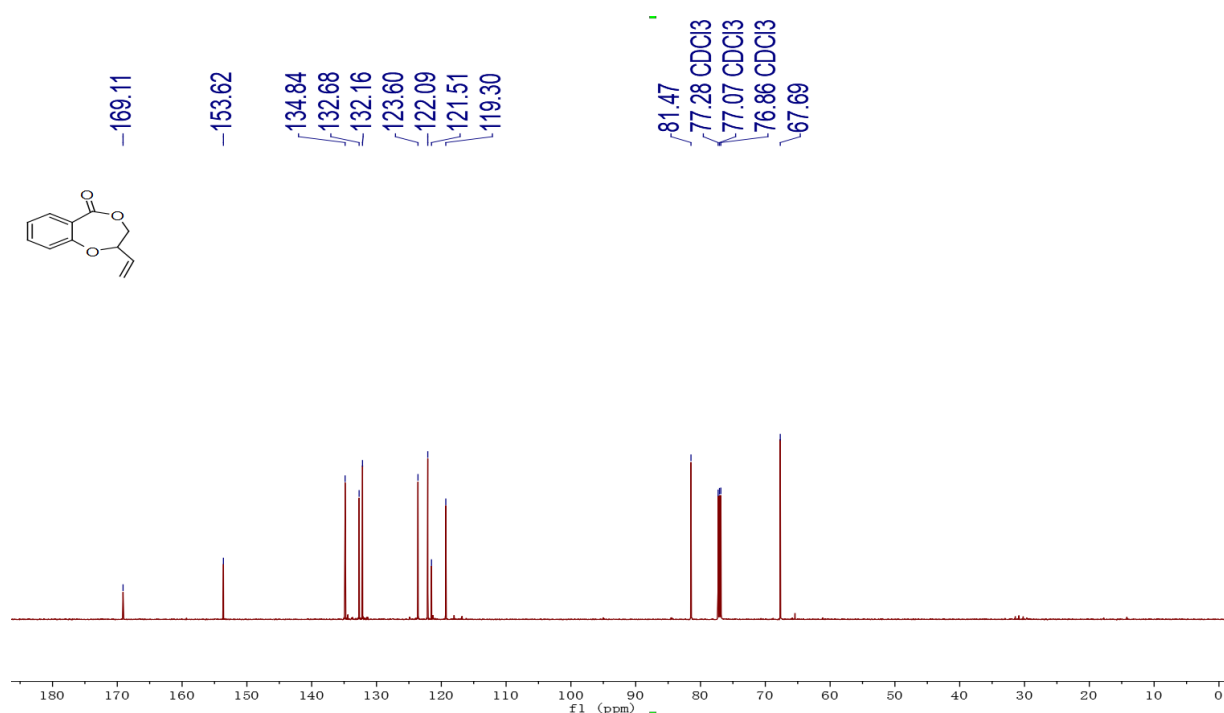

Figure 11.  $^1\text{H}$  NMR (600 MHz,  $\text{CDCl}_3$ ) spectrum of 2b

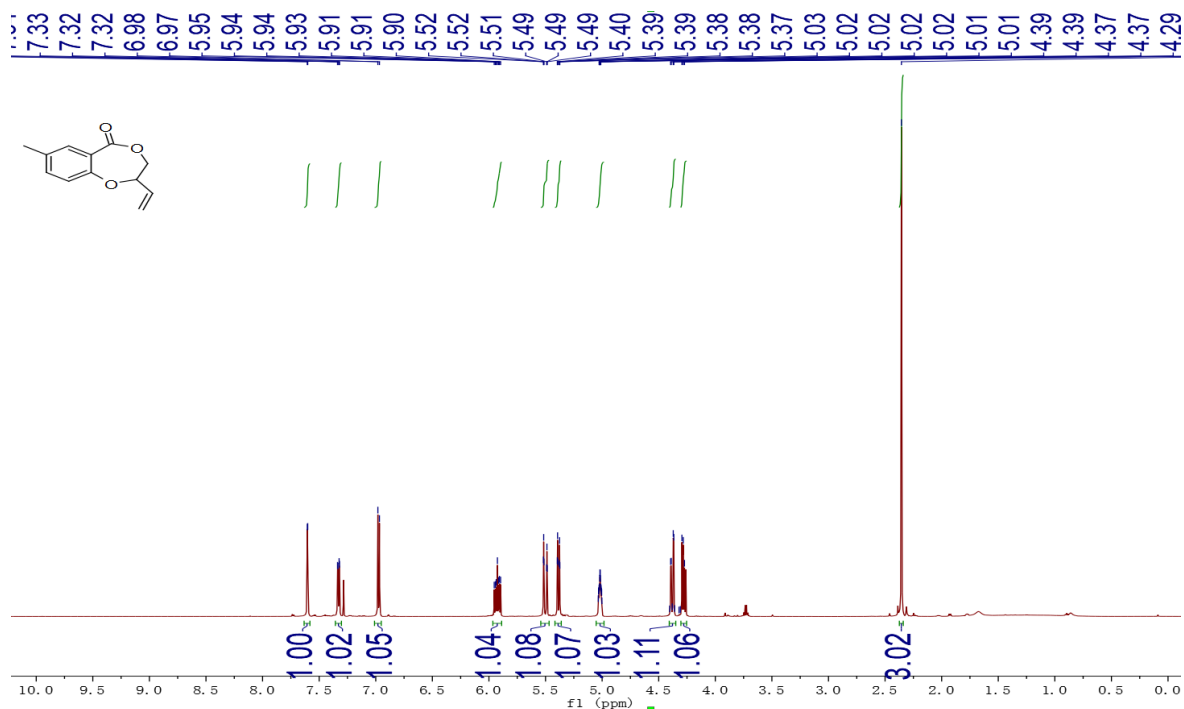

Figure 12.  $^{13}\text{C}$  NMR (151 MHz,  $\text{CDCl}_3$ ) spectrum of 2b

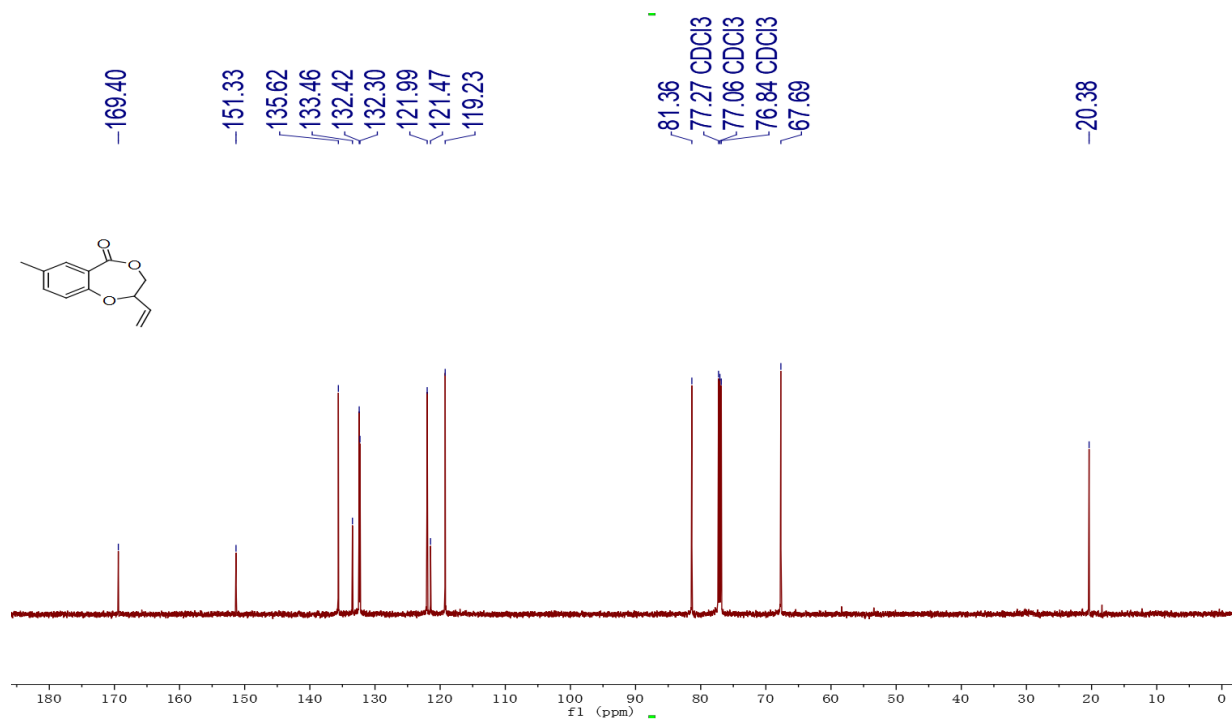

Figure 13.  $^1\text{H}$  NMR (600 MHz,  $\text{CDCl}_3$ ) spectrum of **2c**

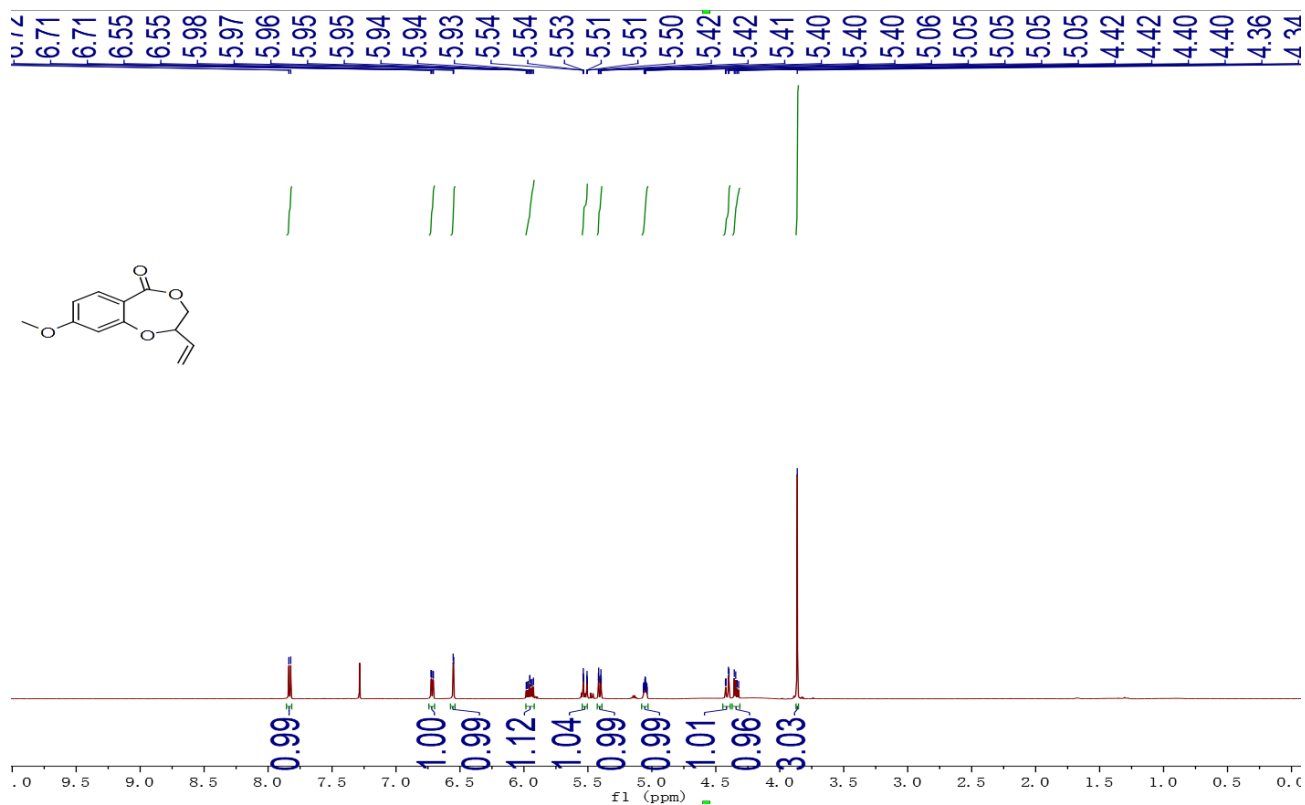

Figure 14.  $^{13}\text{C}$  NMR (151 MHz,  $\text{CDCl}_3$ ) spectrum of **2c**

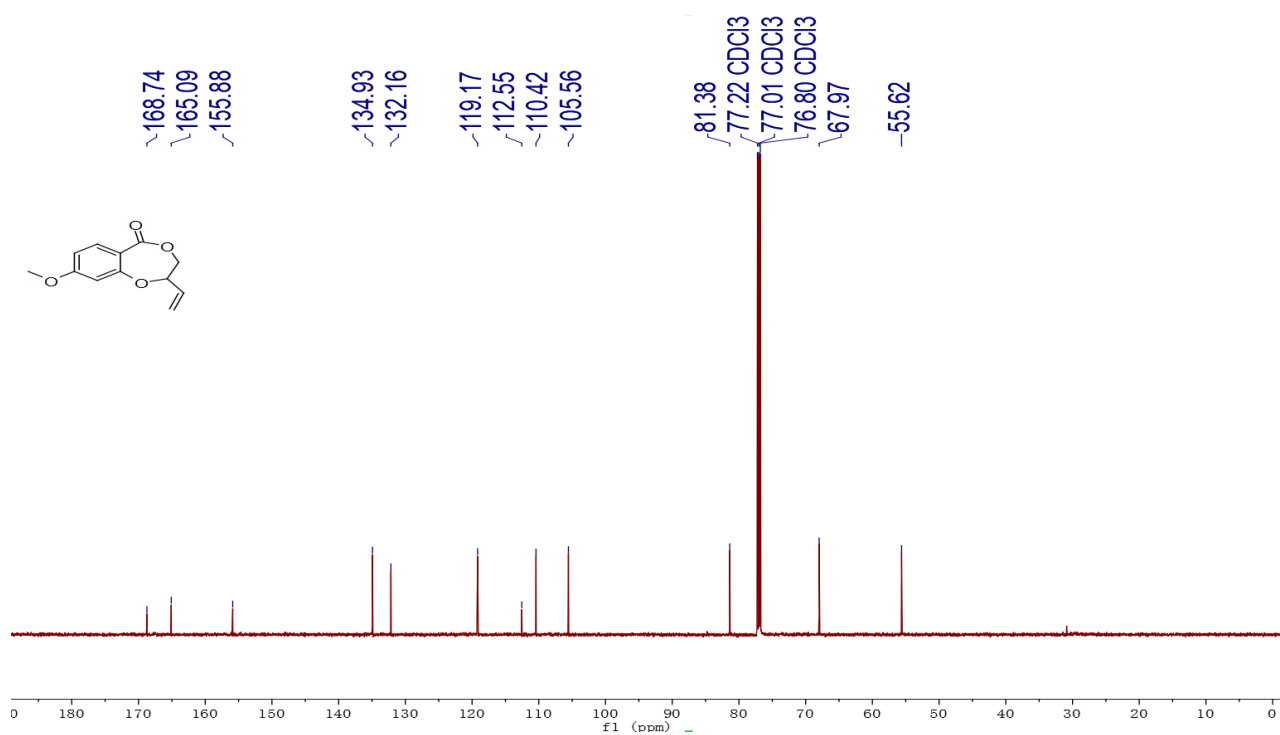

Figure 15.  $^1\text{H}$  NMR (600 MHz,  $\text{CDCl}_3$ ) spectrum of 2d

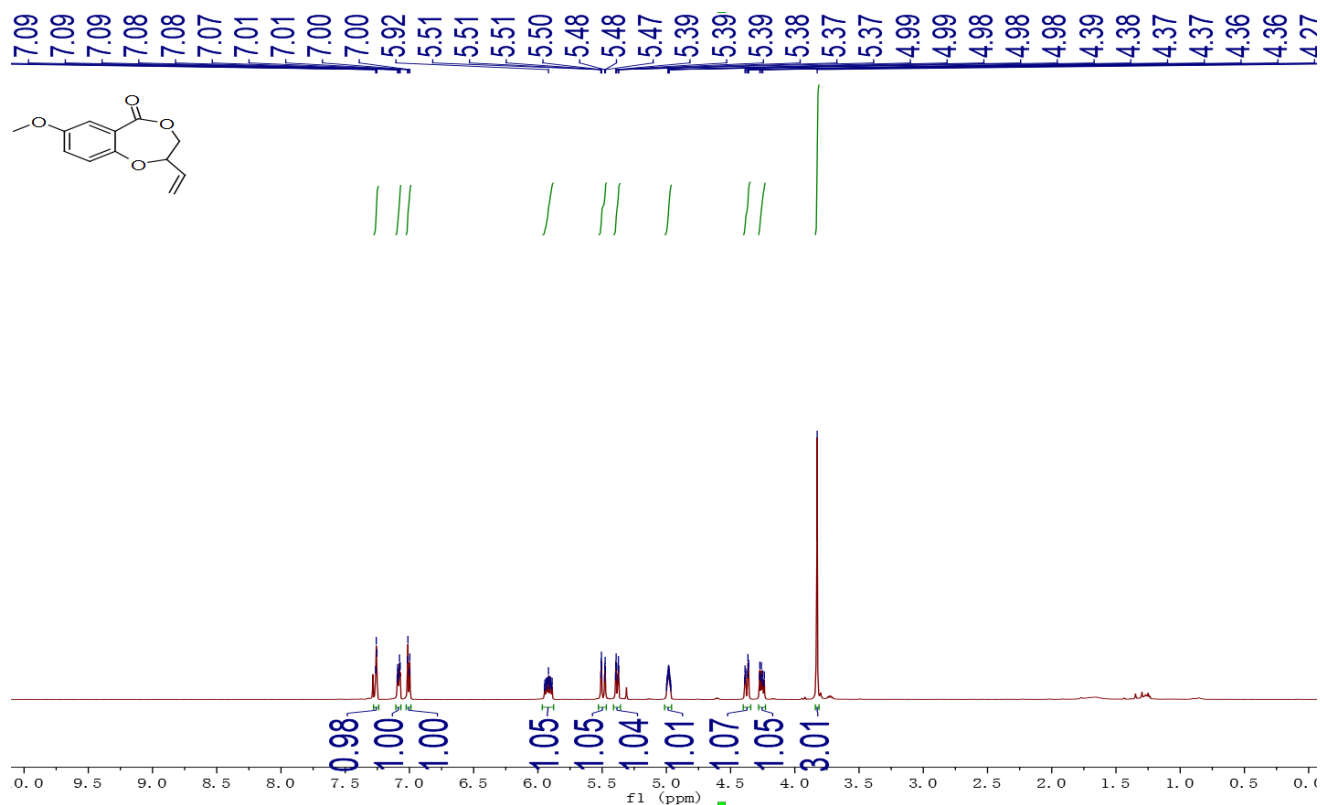

Figure 16.  $^{13}\text{C}$  NMR (151 MHz,  $\text{CDCl}_3$ ) spectrum of 2d

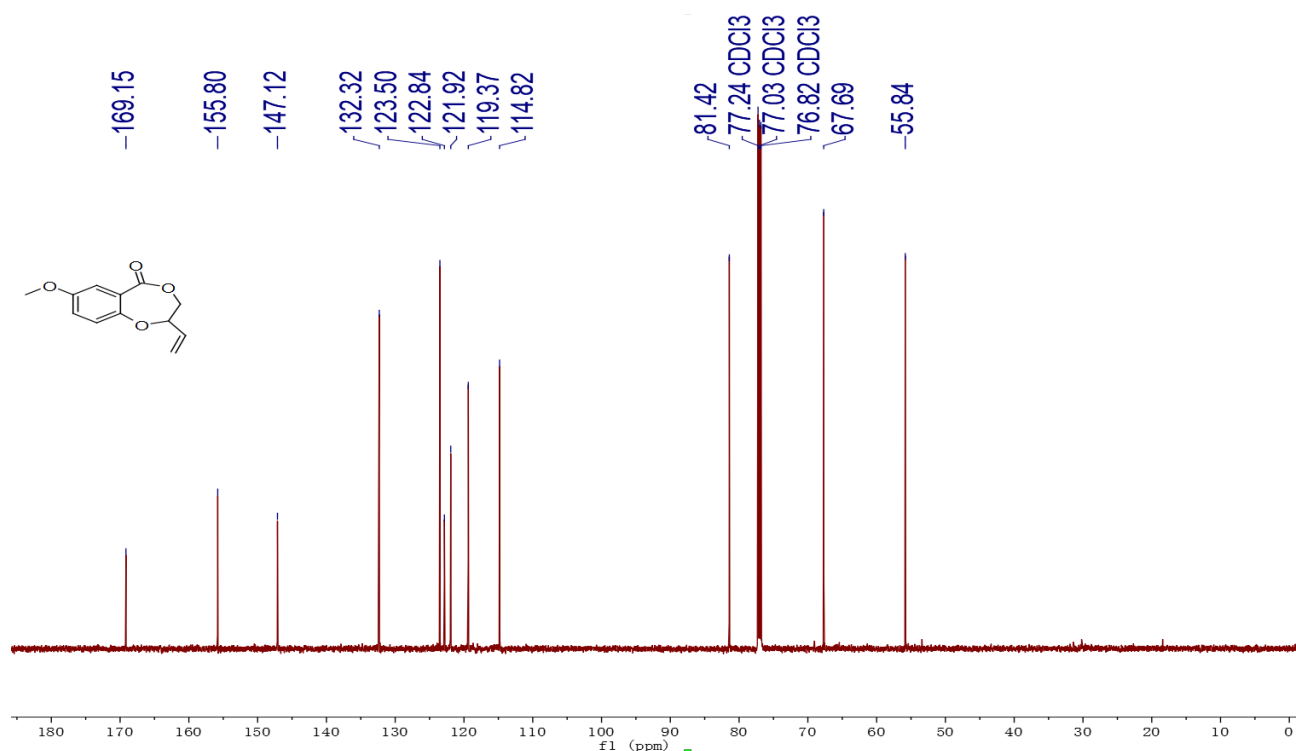

Figure 17.  $^1\text{H}$  NMR (600 MHz,  $\text{CDCl}_3$ ) spectrum of 2e

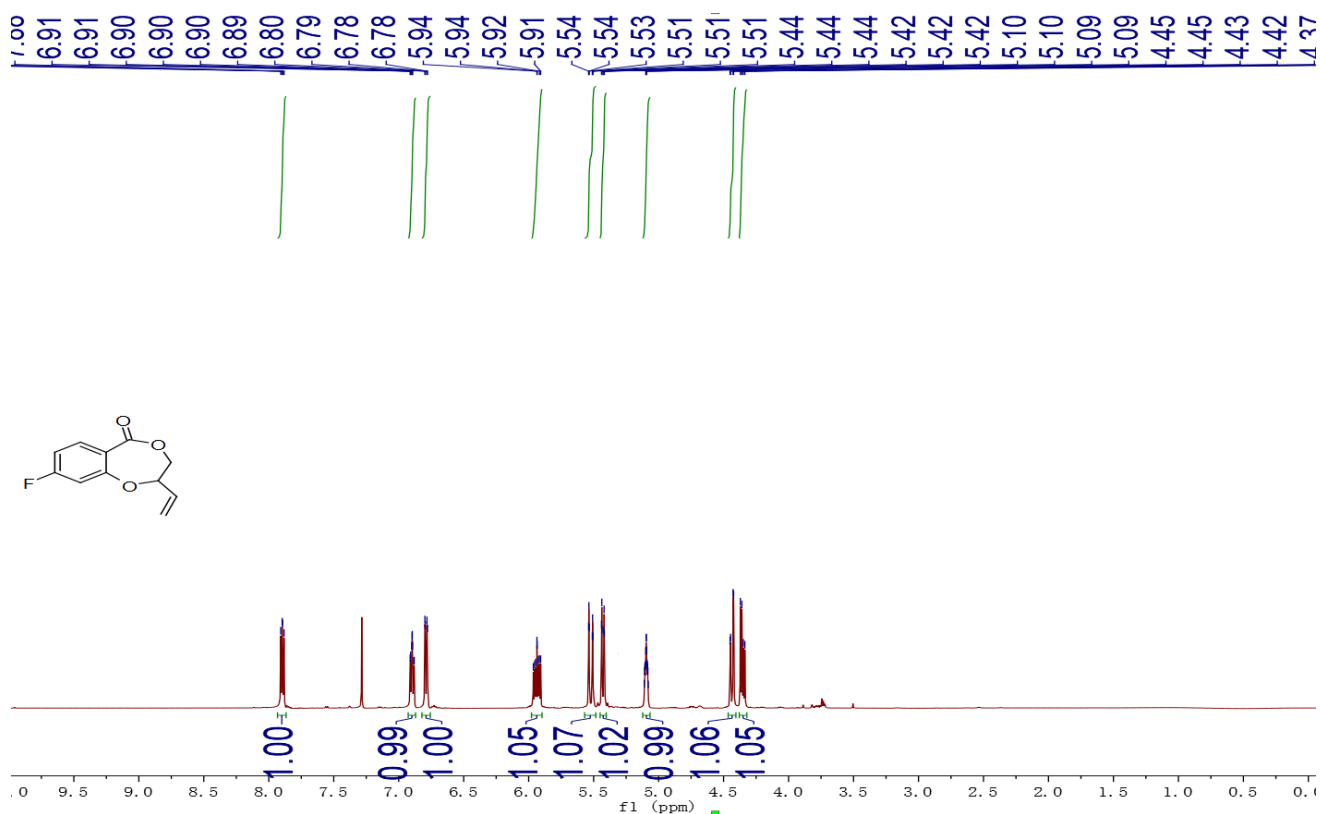

Figure 18.  $^{13}\text{C}$  NMR (151 MHz,  $\text{CDCl}_3$ ) spectrum of 2e

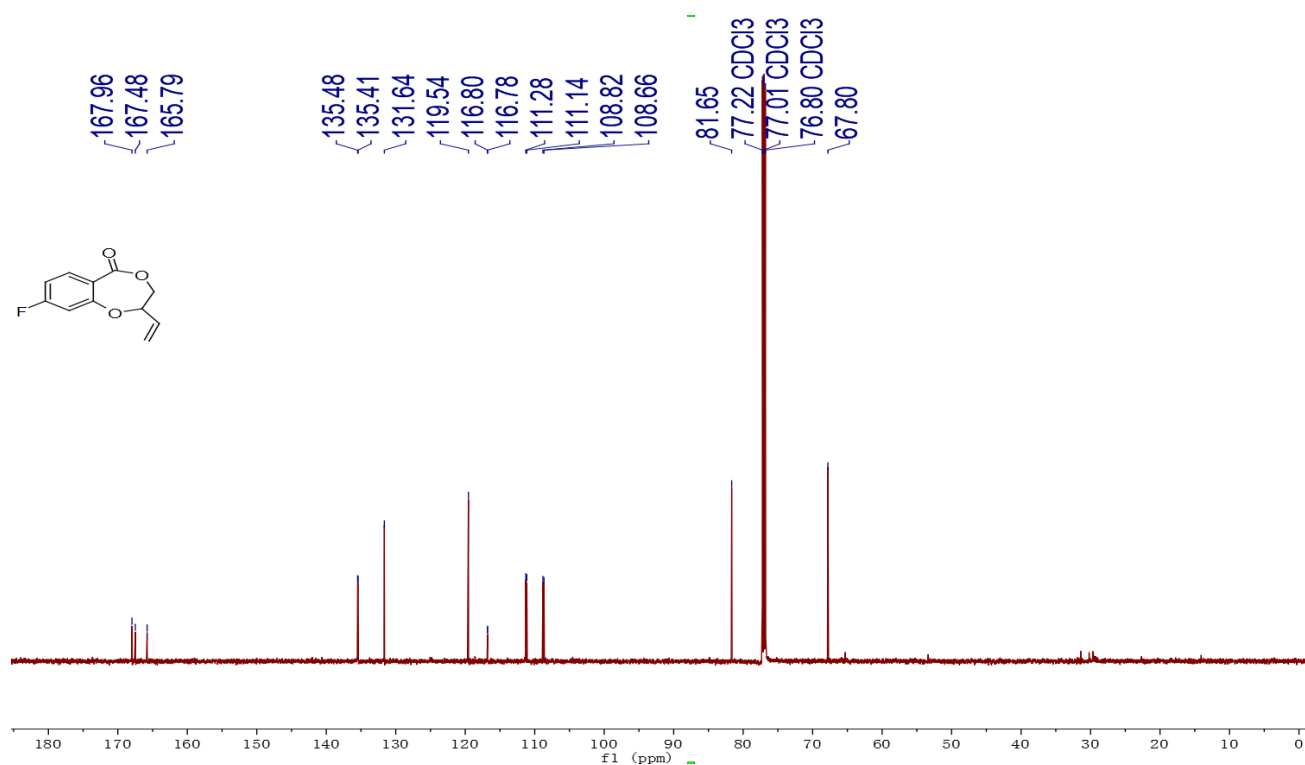

Figure 19.  $^{19}\text{F}$  NMR (565 MHz,  $\text{CDCl}_3$ ) spectrum of 2e

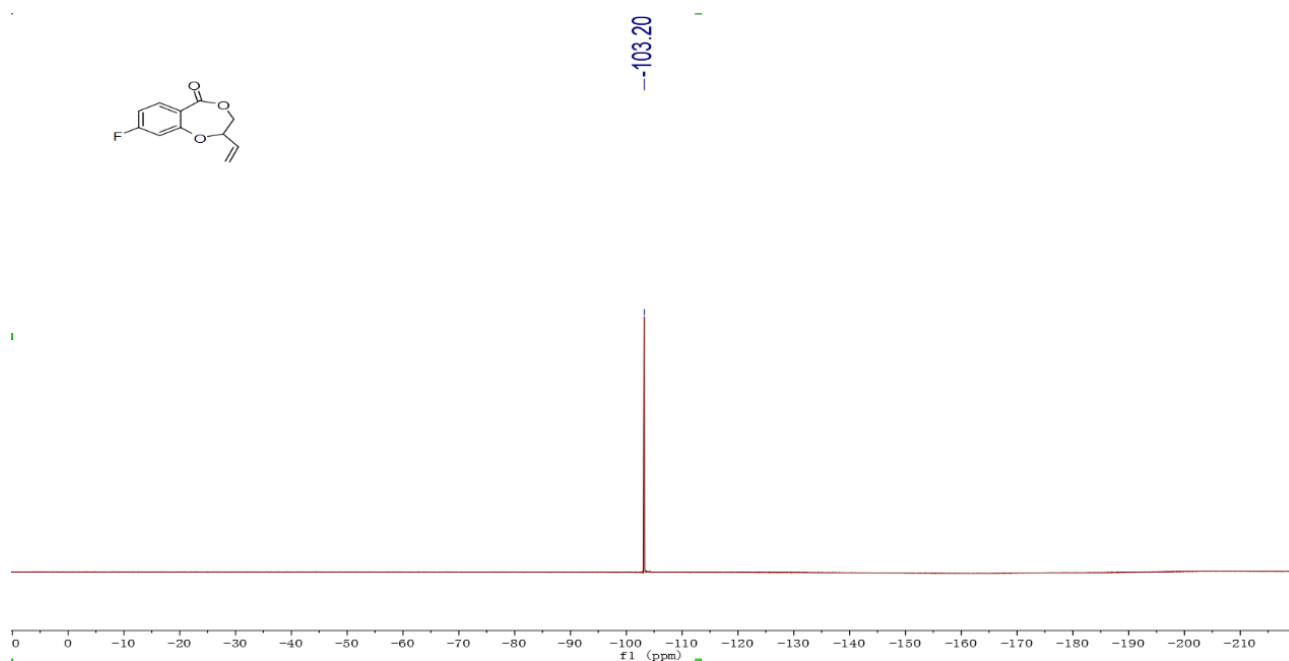

Figure 20.  $^1\text{H}$  NMR (600 MHz,  $\text{CDCl}_3$ ) spectrum of 2f

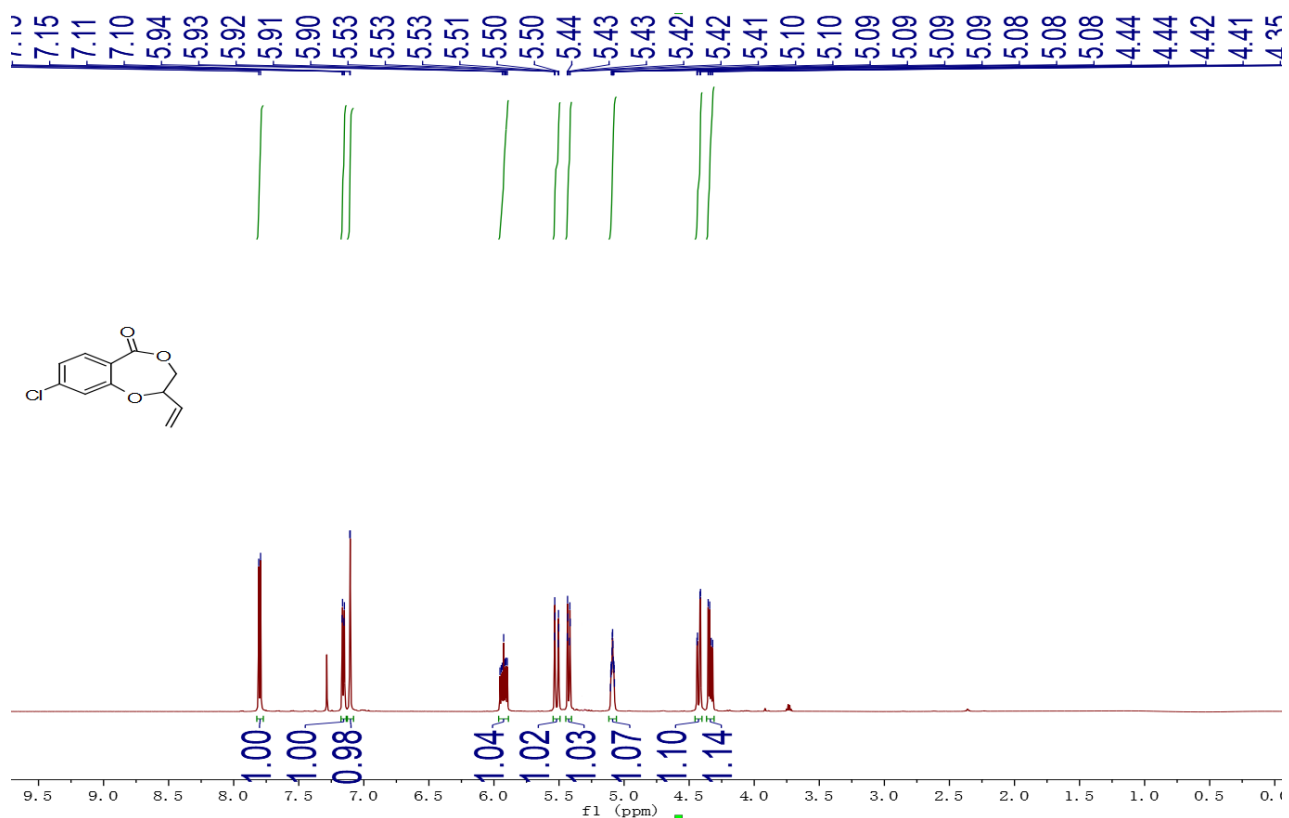

Figure 21.  $^{13}\text{C}$  NMR (151 MHz,  $\text{CDCl}_3$ ) spectrum of 2f

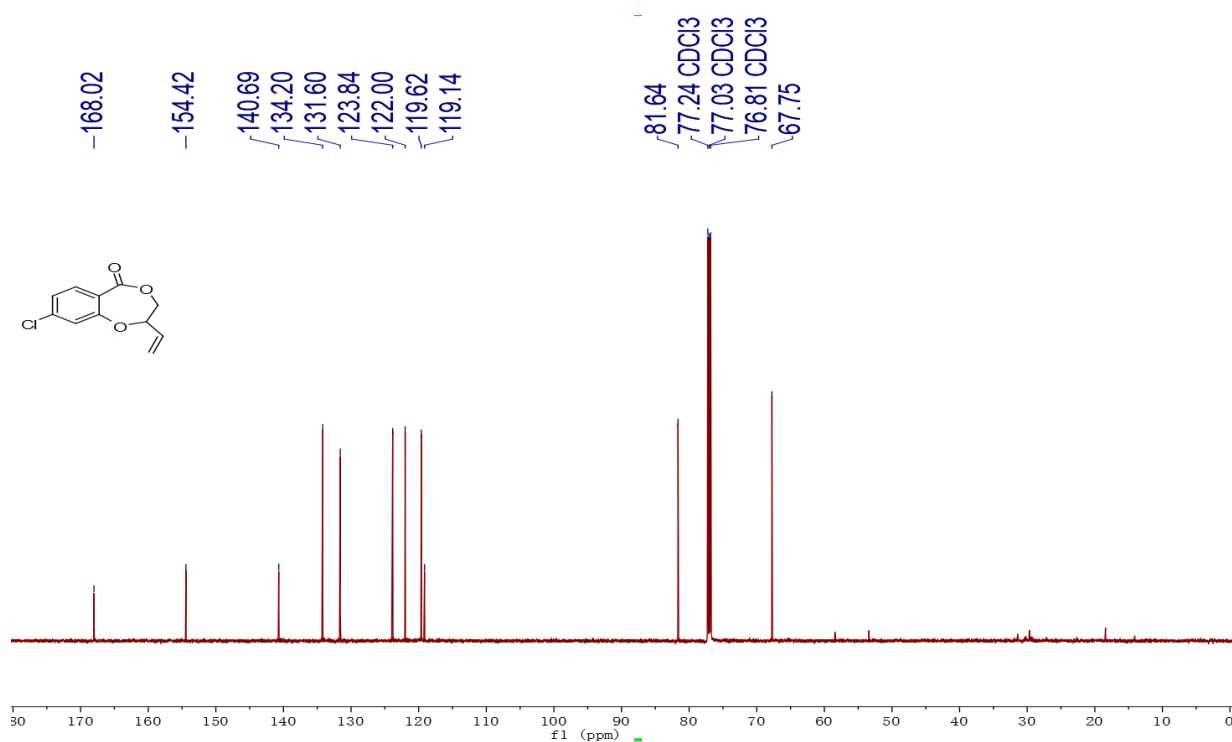

Figure 22.  $^1\text{H}$  NMR (600 MHz,  $\text{CDCl}_3$ ) spectrum of 2g

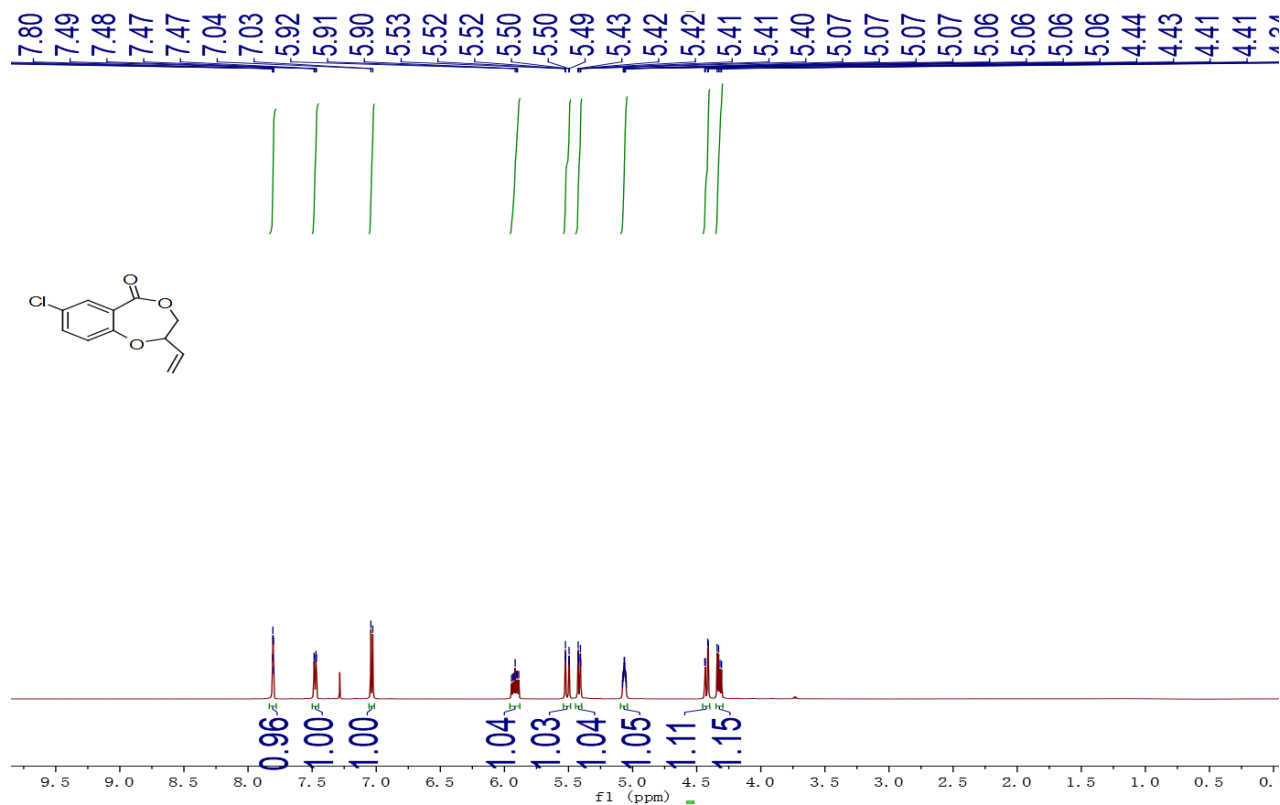



**Figure 23.**  $^{13}\text{C}$  NMR (151 MHz,  $\text{CDCl}_3$ ) spectrum of **2g**

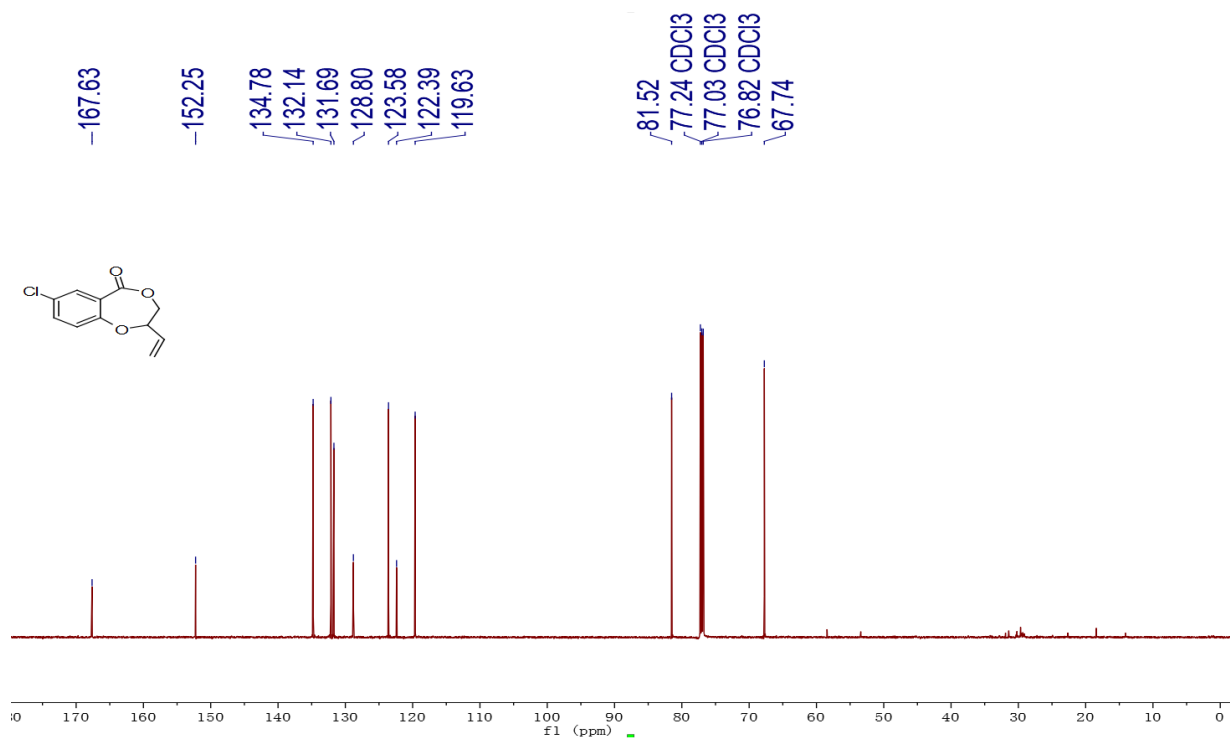

**Figure 24.**  $^1\text{H}$  NMR (600 MHz,  $\text{CDCl}_3$ ) spectrum of **2h**

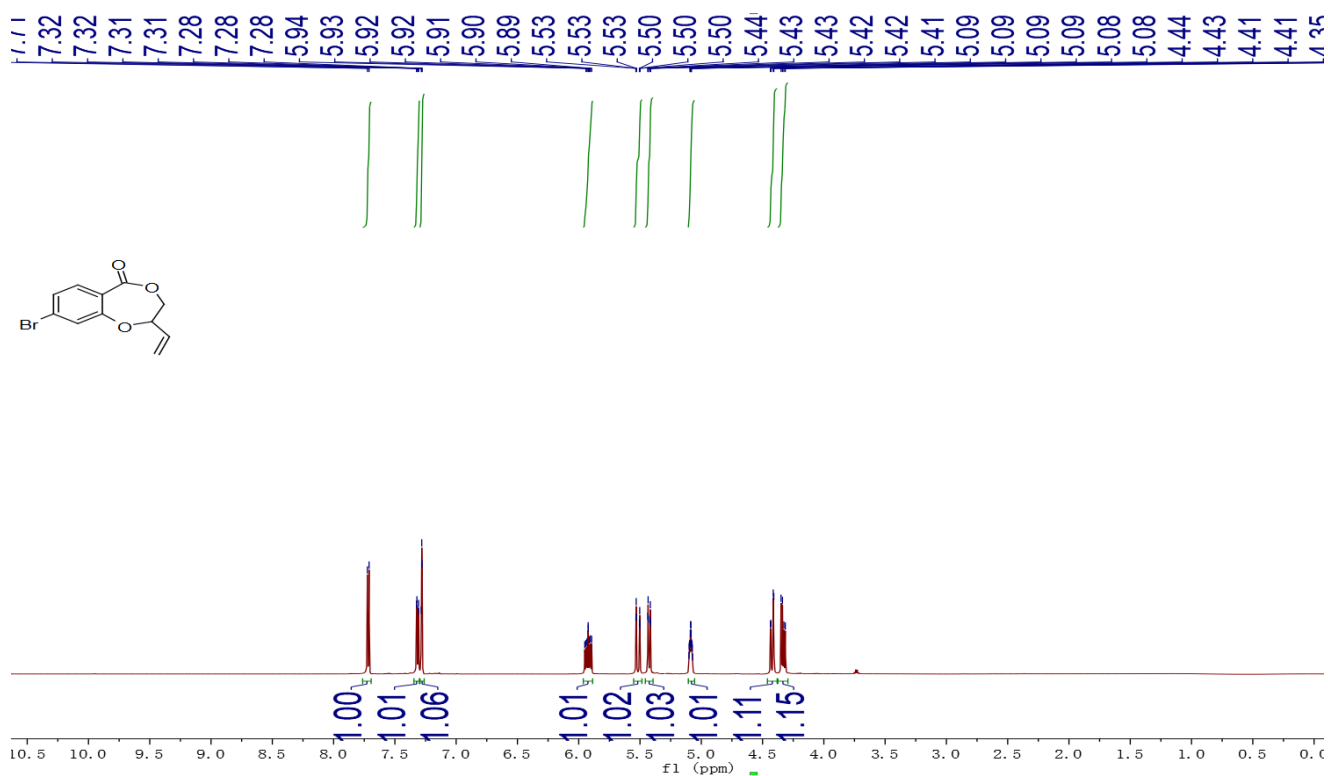

Figure 25.  $^{13}\text{C}$  NMR (151 MHz,  $\text{CDCl}_3$ ) spectrum of 2h

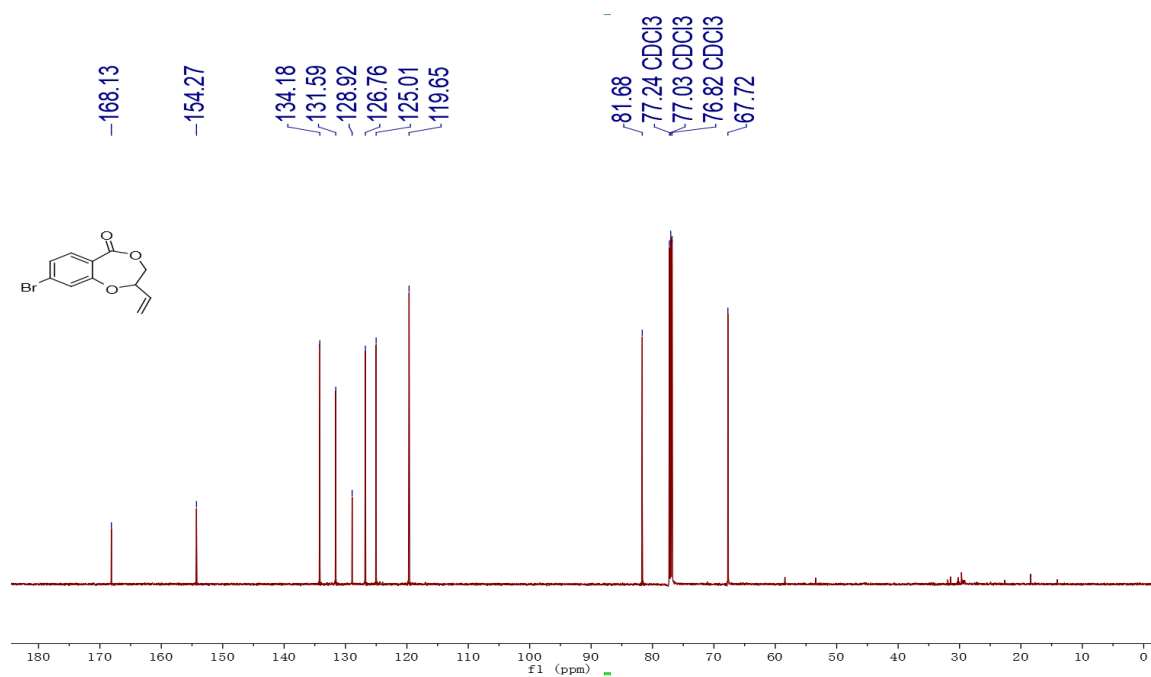

Figure 26.  $^1\text{H}$  NMR (600 MHz,  $\text{CDCl}_3$ ) spectrum of 2i

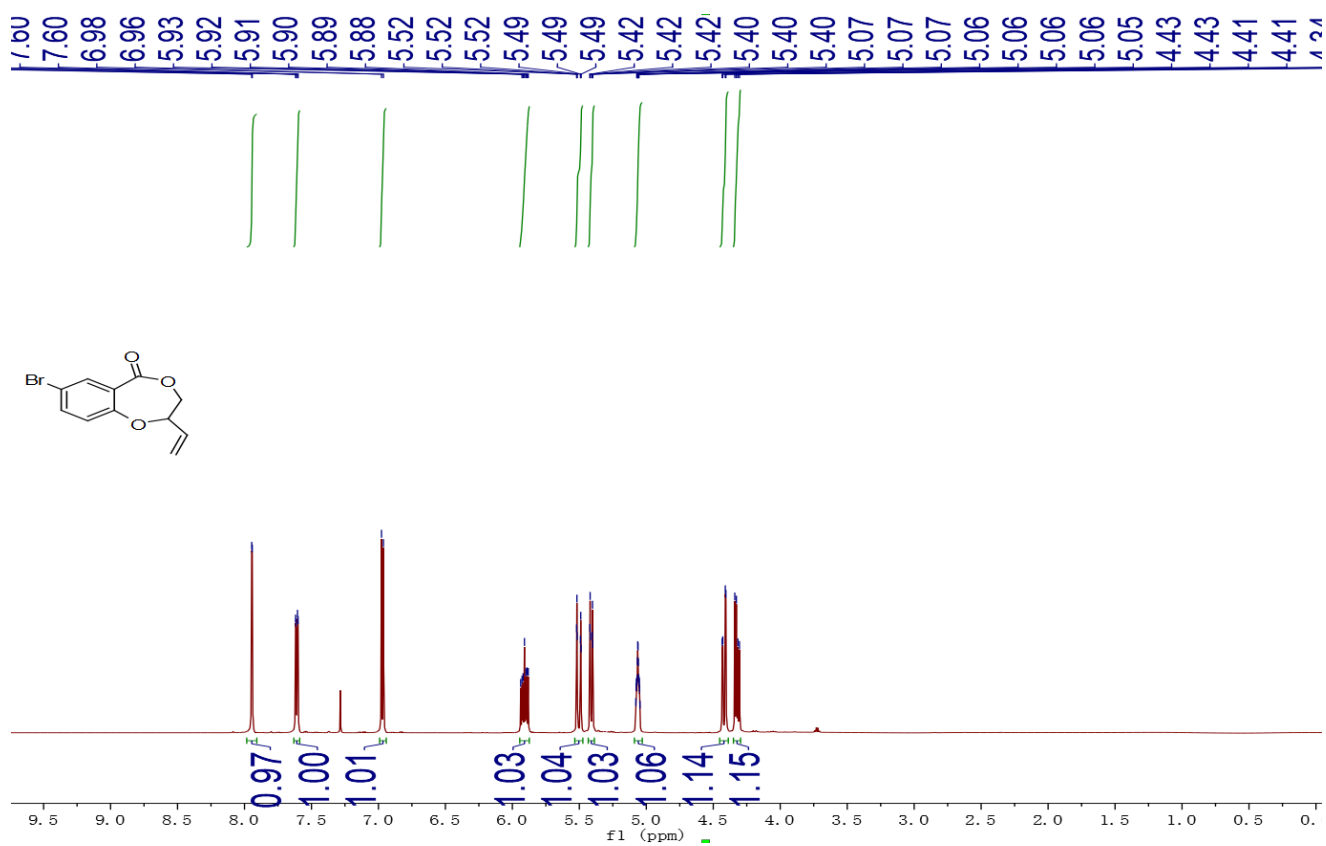

Figure 27.  $^{13}\text{C}$  NMR (151 MHz,  $\text{CDCl}_3$ ) spectrum of **2i**

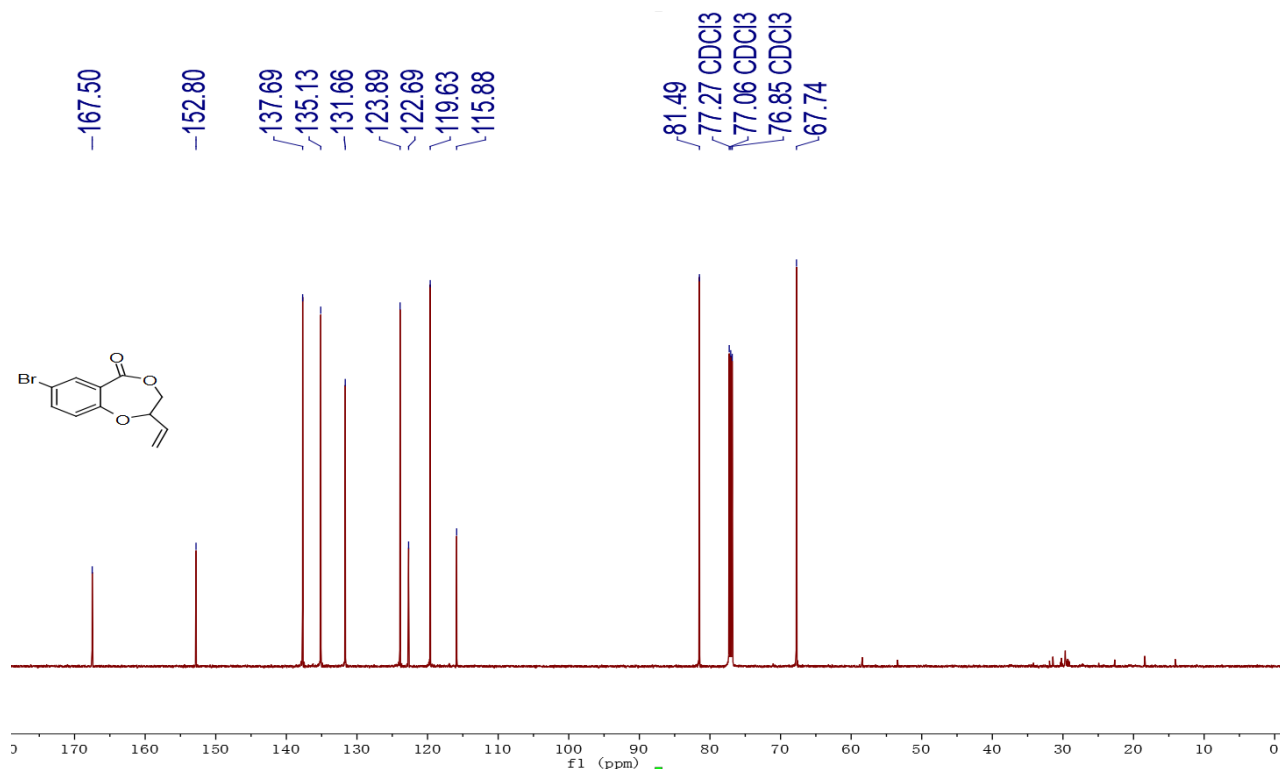

Figure 28.  $^1\text{H}$  NMR (600 MHz,  $\text{CDCl}_3$ ) spectrum of **2j**

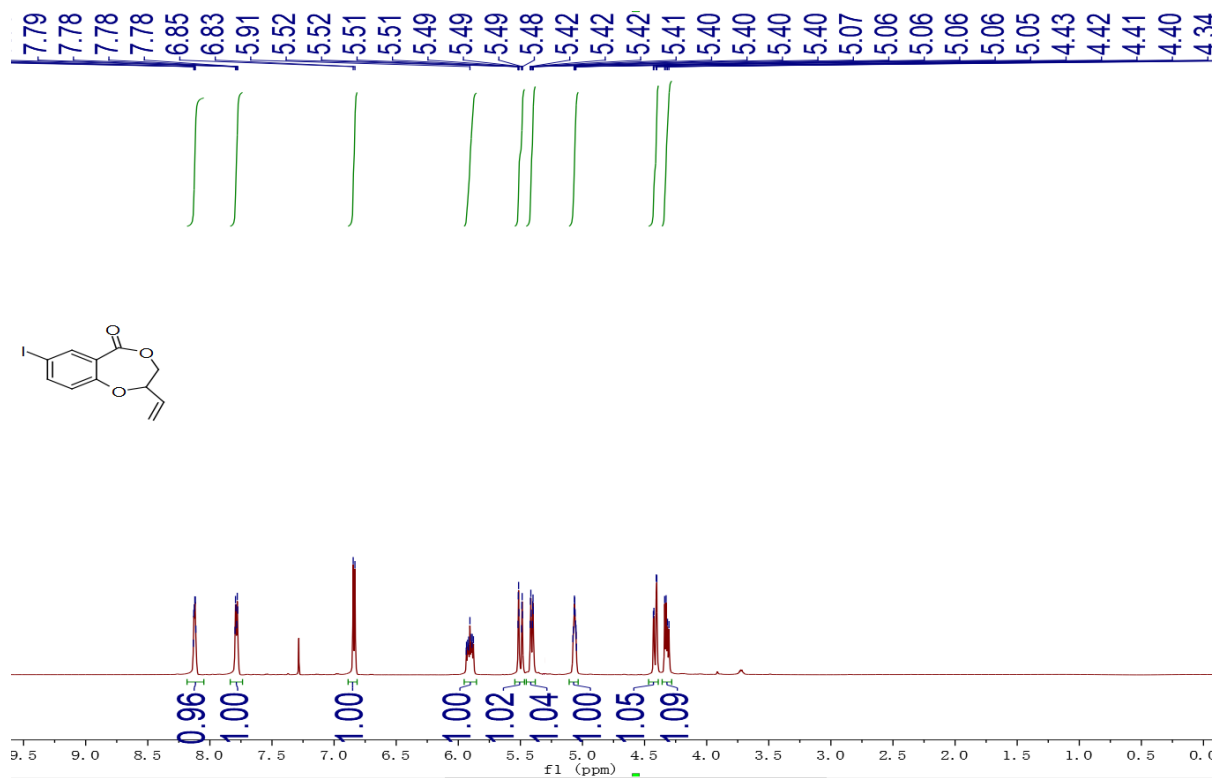

Figure 29.  $^{13}\text{C}$  NMR (151 MHz,  $\text{CDCl}_3$ ) spectrum of 2j

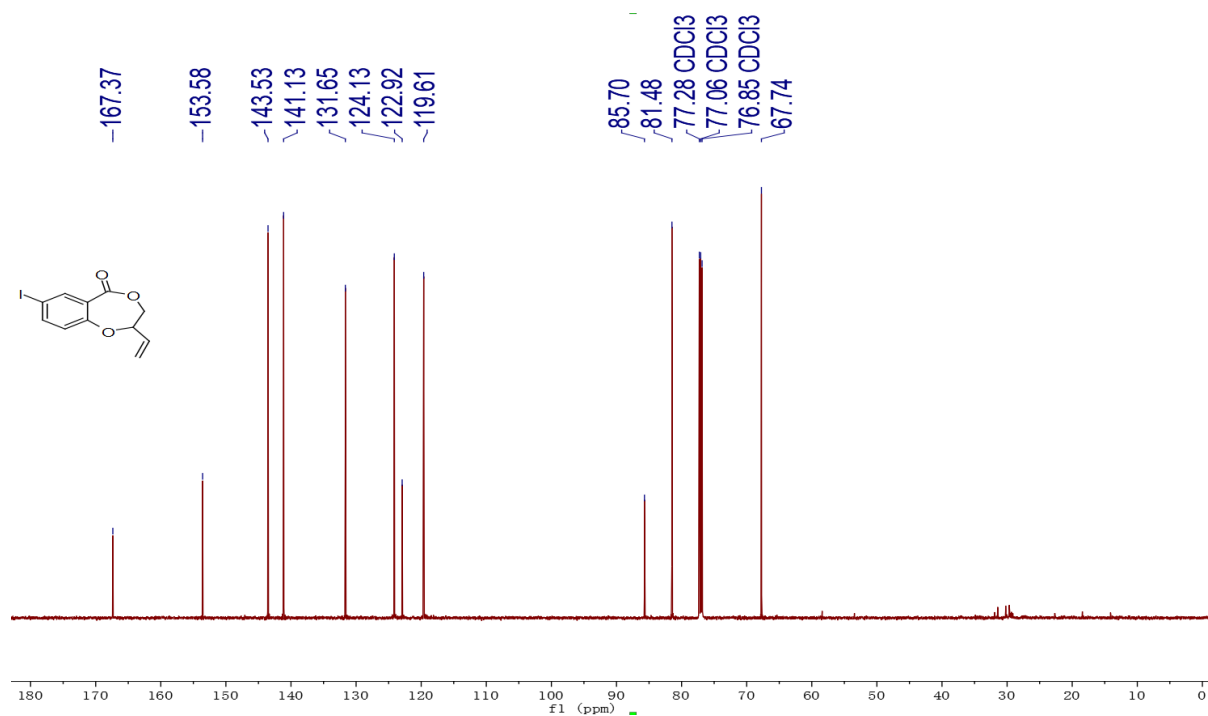

Figure 30.  $^1\text{H}$  NMR (600 MHz,  $\text{CDCl}_3$ ) spectrum of 2k

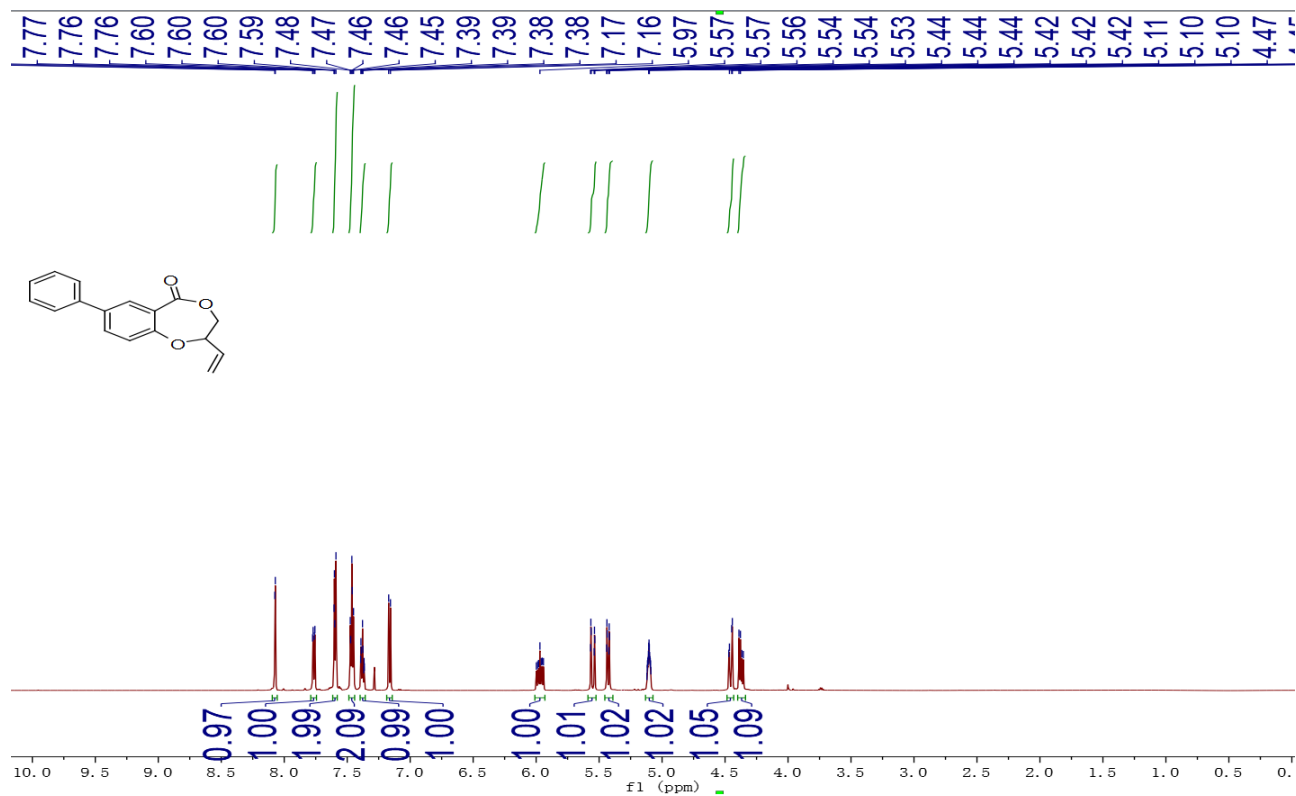

Figure 31.  $^{13}\text{C}$  NMR (151 MHz,  $\text{CDCl}_3$ ) spectrum of 2k

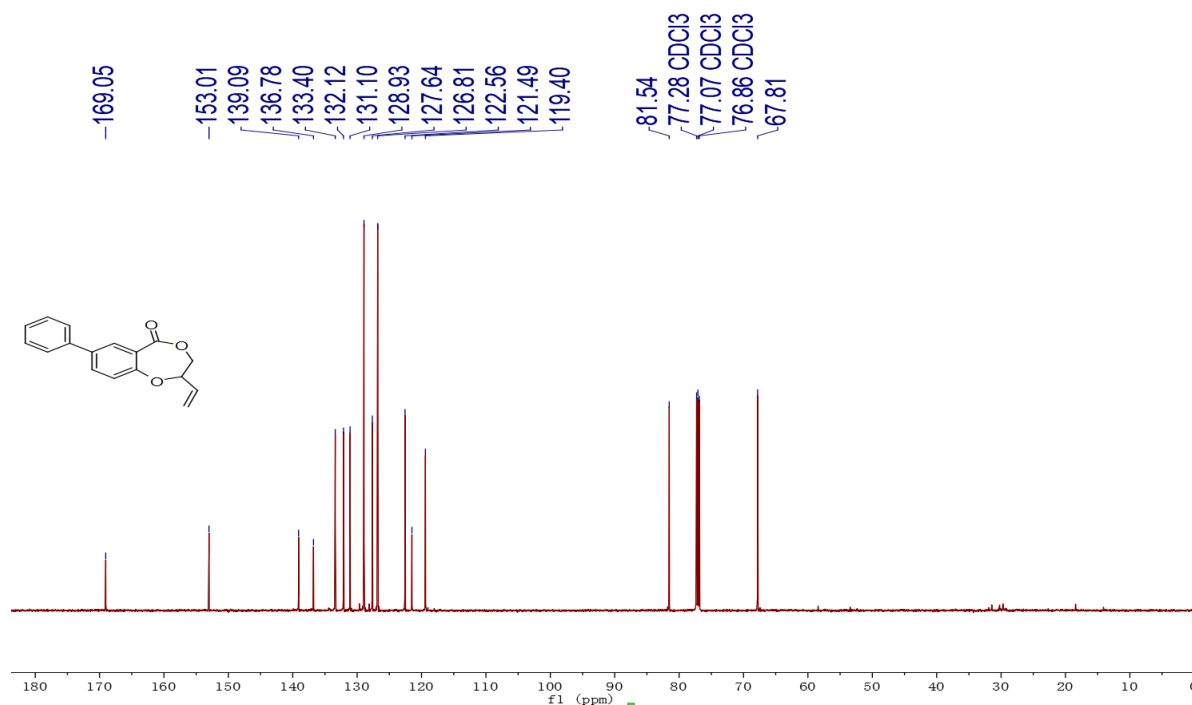

Figure 32.  $^1\text{H}$  NMR (600 MHz,  $\text{CDCl}_3$ ) spectrum of 2l

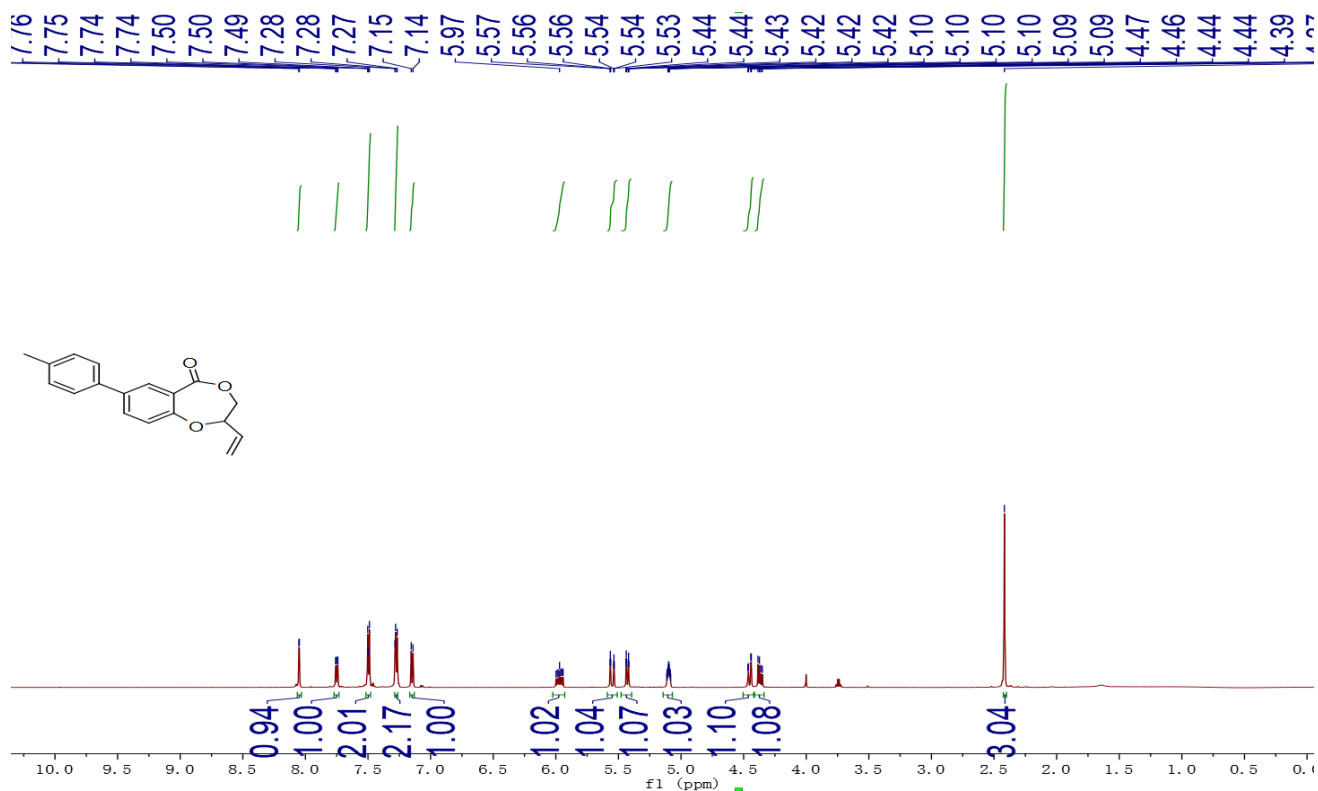

Figure 33. <sup>13</sup>C NMR (151 MHz, CDCl<sub>3</sub>) spectrum of 2l

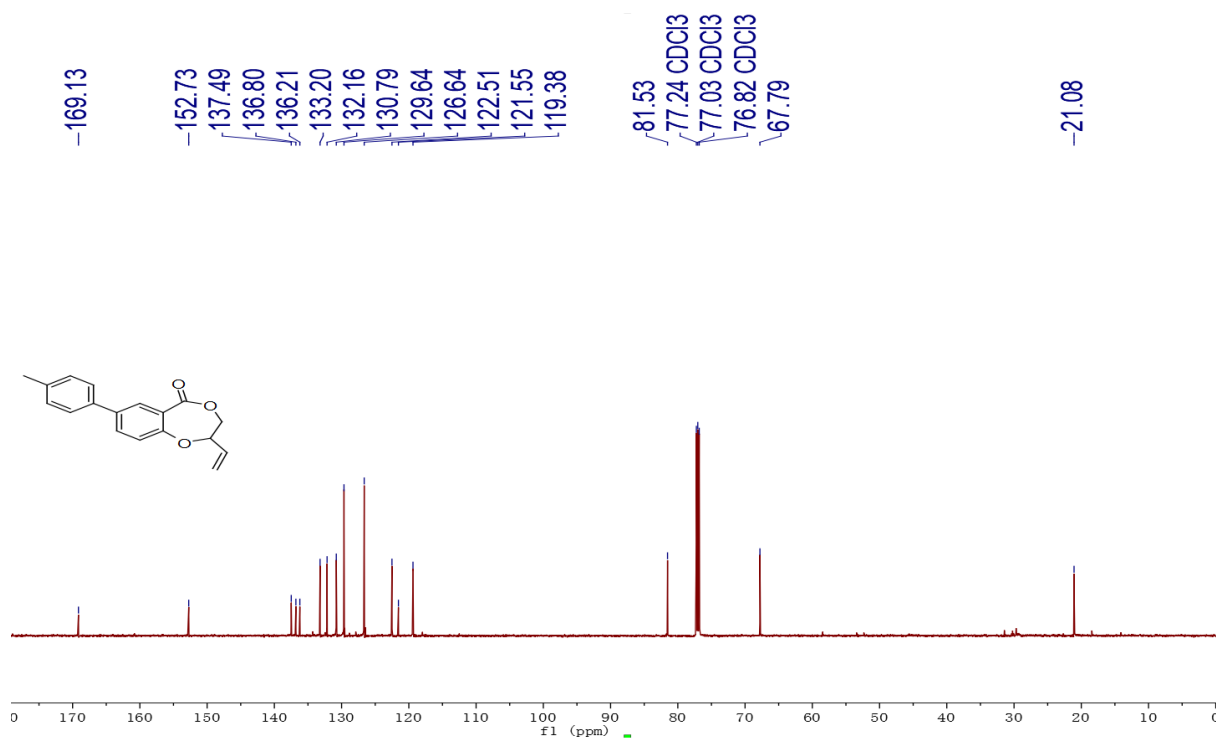

Figure 34. <sup>1</sup>H NMR (600 MHz, CDCl<sub>3</sub>) spectrum of 2m

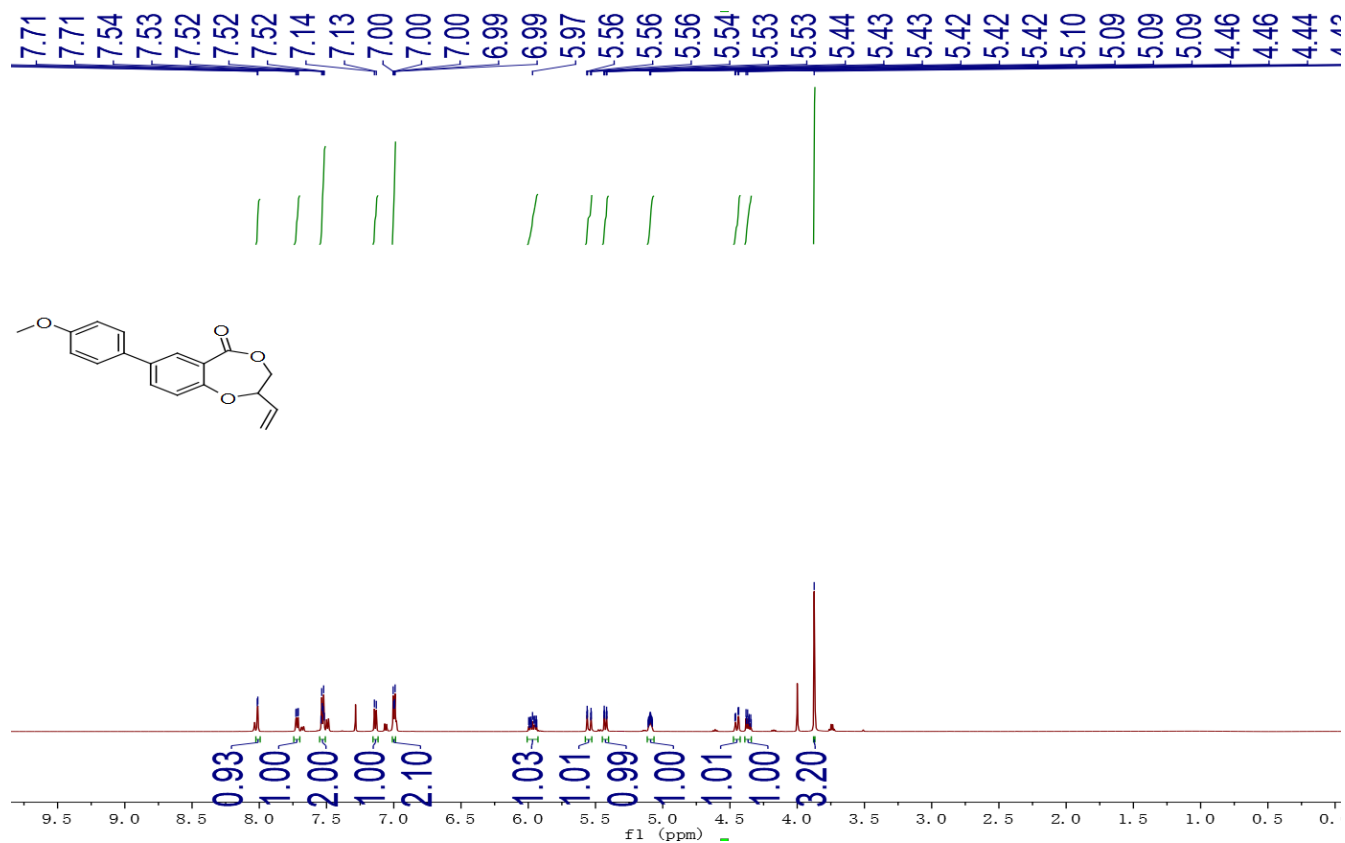

Figure 35.  $^{13}\text{C}$  NMR (151 MHz,  $\text{CDCl}_3$ ) spectrum of 2m

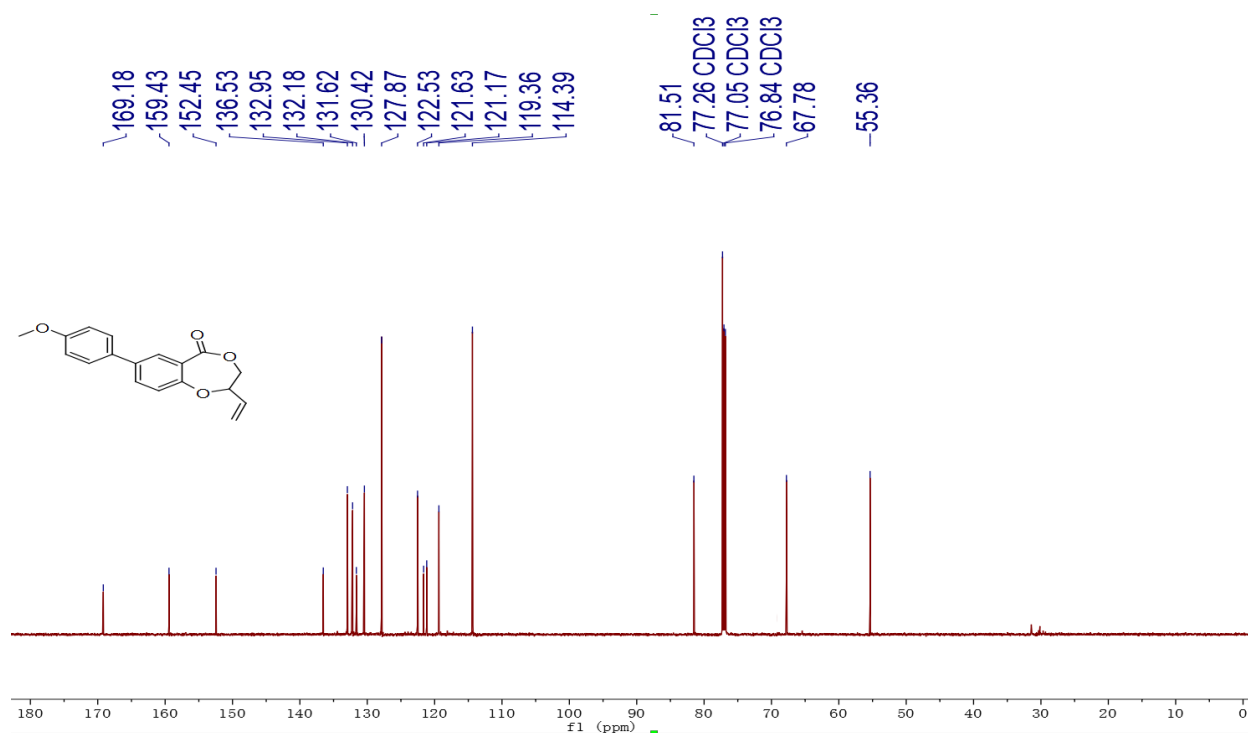

Figure 36.  $^1\text{H}$  NMR (600 MHz,  $\text{CDCl}_3$ ) spectrum of 2n

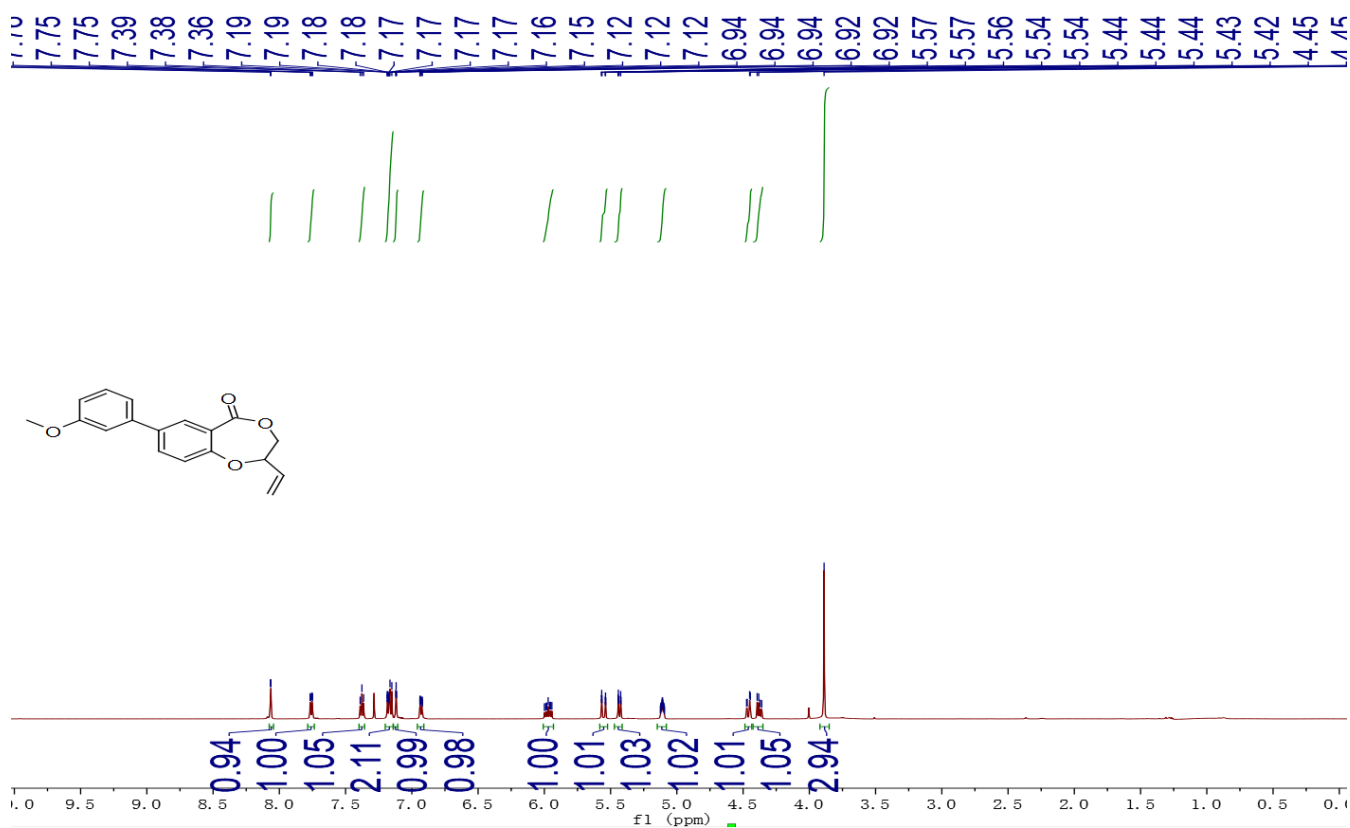

Figure 37. <sup>13</sup>C NMR (151 MHz, CDCl<sub>3</sub>) spectrum of 2n

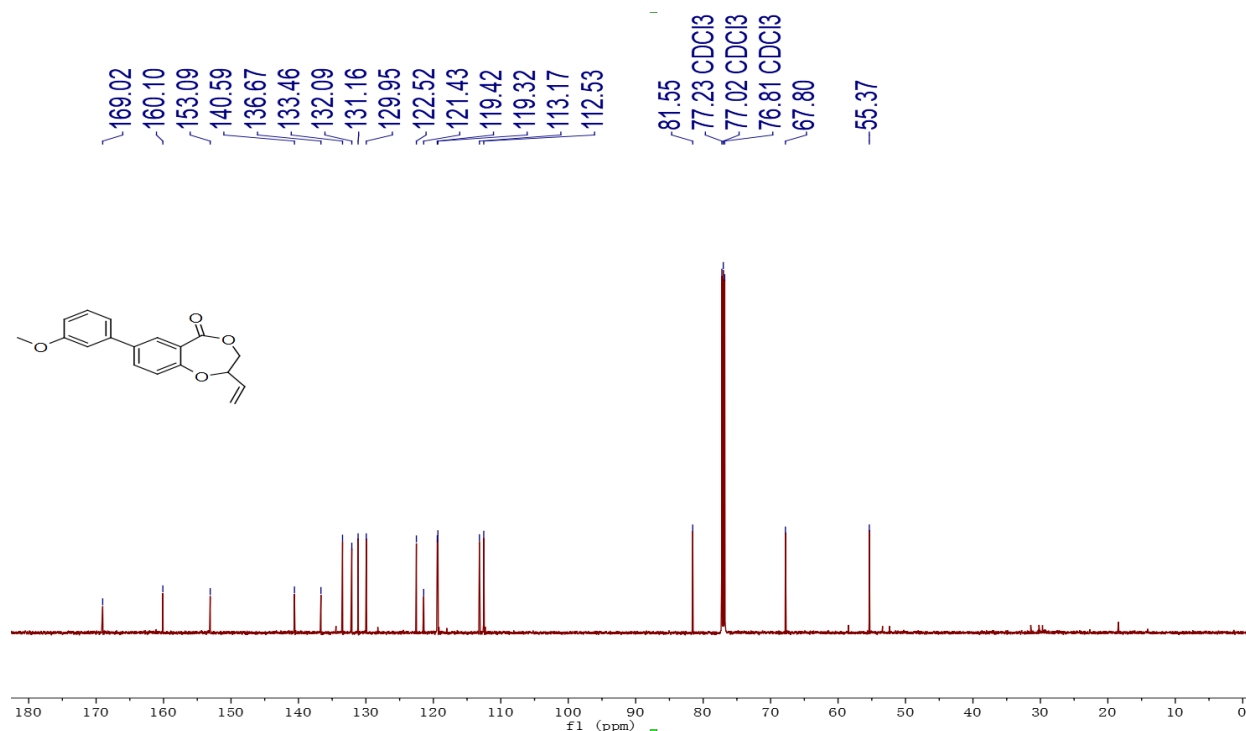

Figure 38. <sup>1</sup>H NMR (600 MHz, CDCl<sub>3</sub>) spectrum of 2o

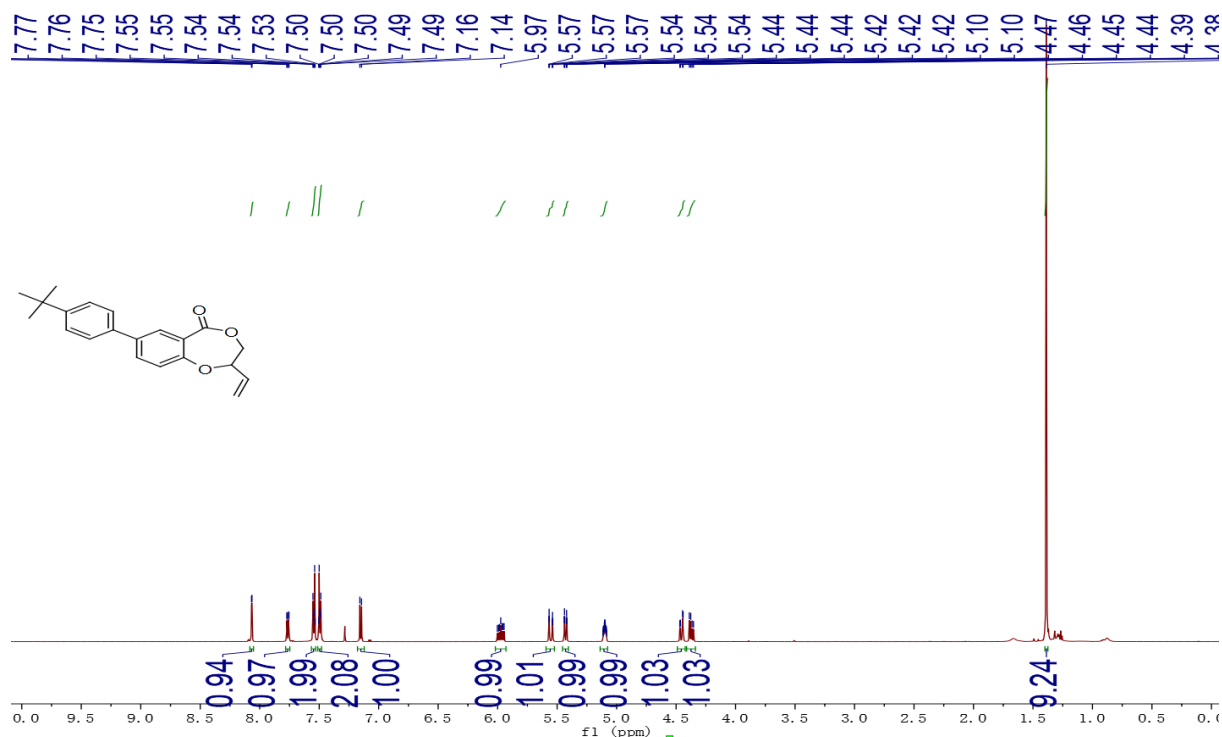



Figure 39.  $^{13}\text{C}$  NMR (151 MHz,  $\text{CDCl}_3$ ) spectrum of 2o

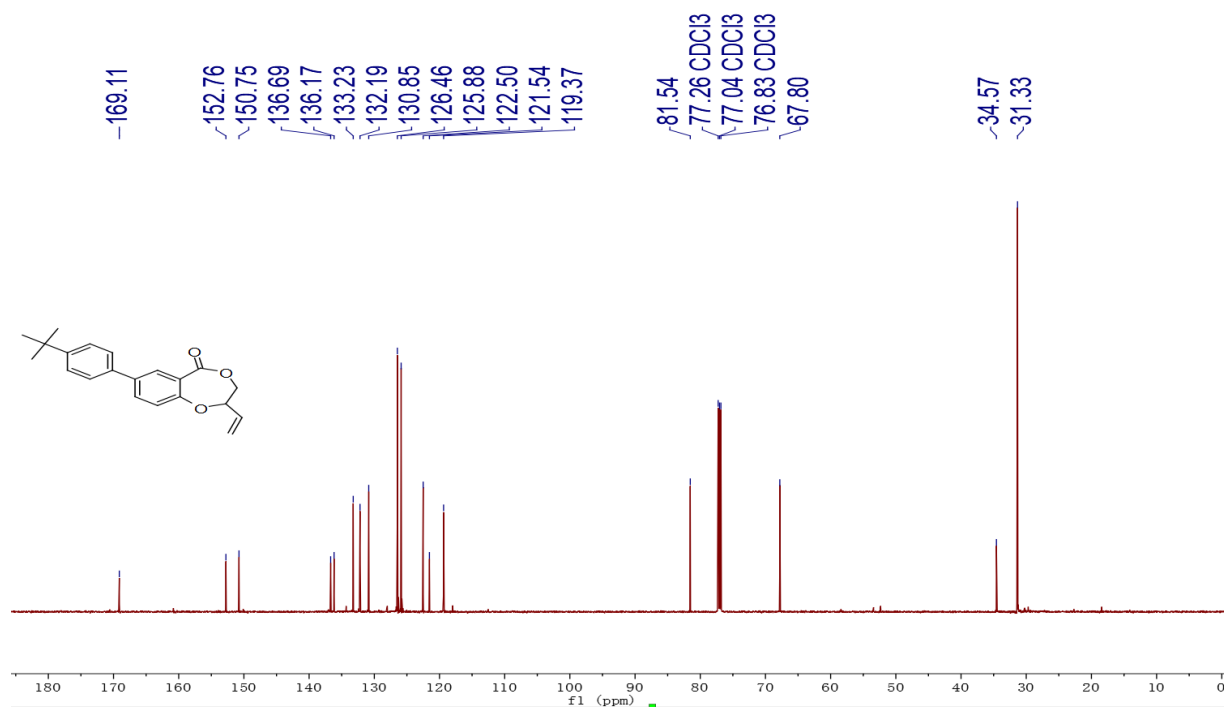

Figure 40.  $^1\text{H}$  NMR (600 MHz,  $\text{CDCl}_3$ ) spectrum of 2p

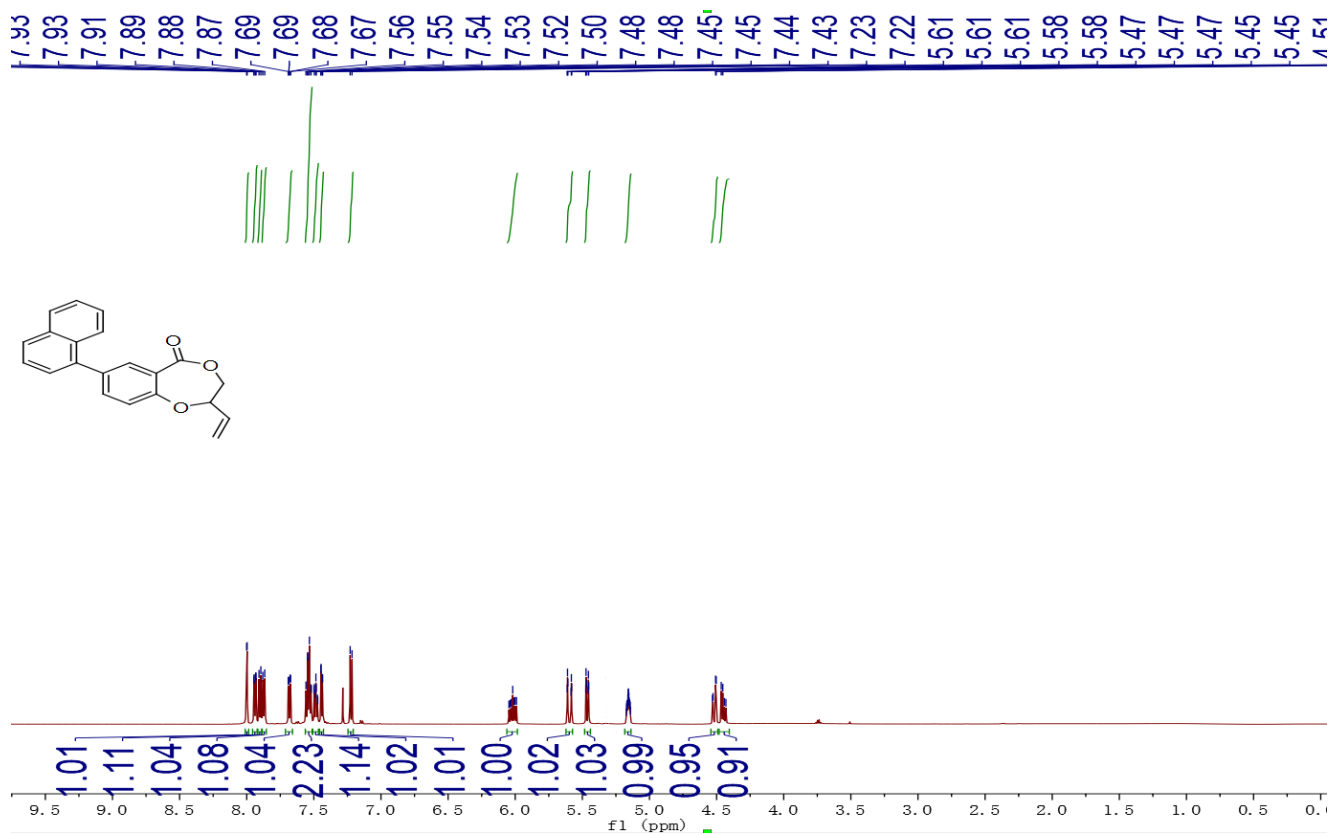

Figure 41.  $^{13}\text{C}$  NMR (151 MHz,  $\text{CDCl}_3$ ) spectrum of 2p

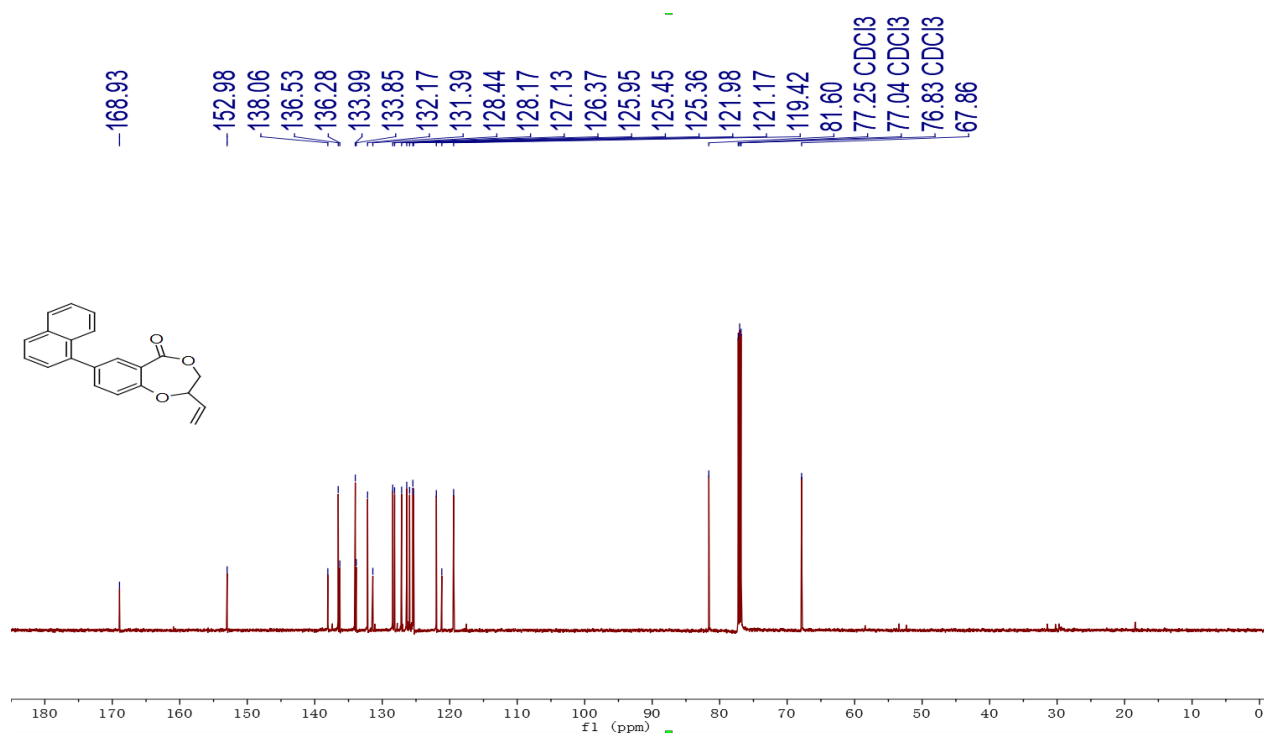

Figure 42.  $^1\text{H}$  NMR (600 MHz,  $\text{CDCl}_3$ ) spectrum of 2q

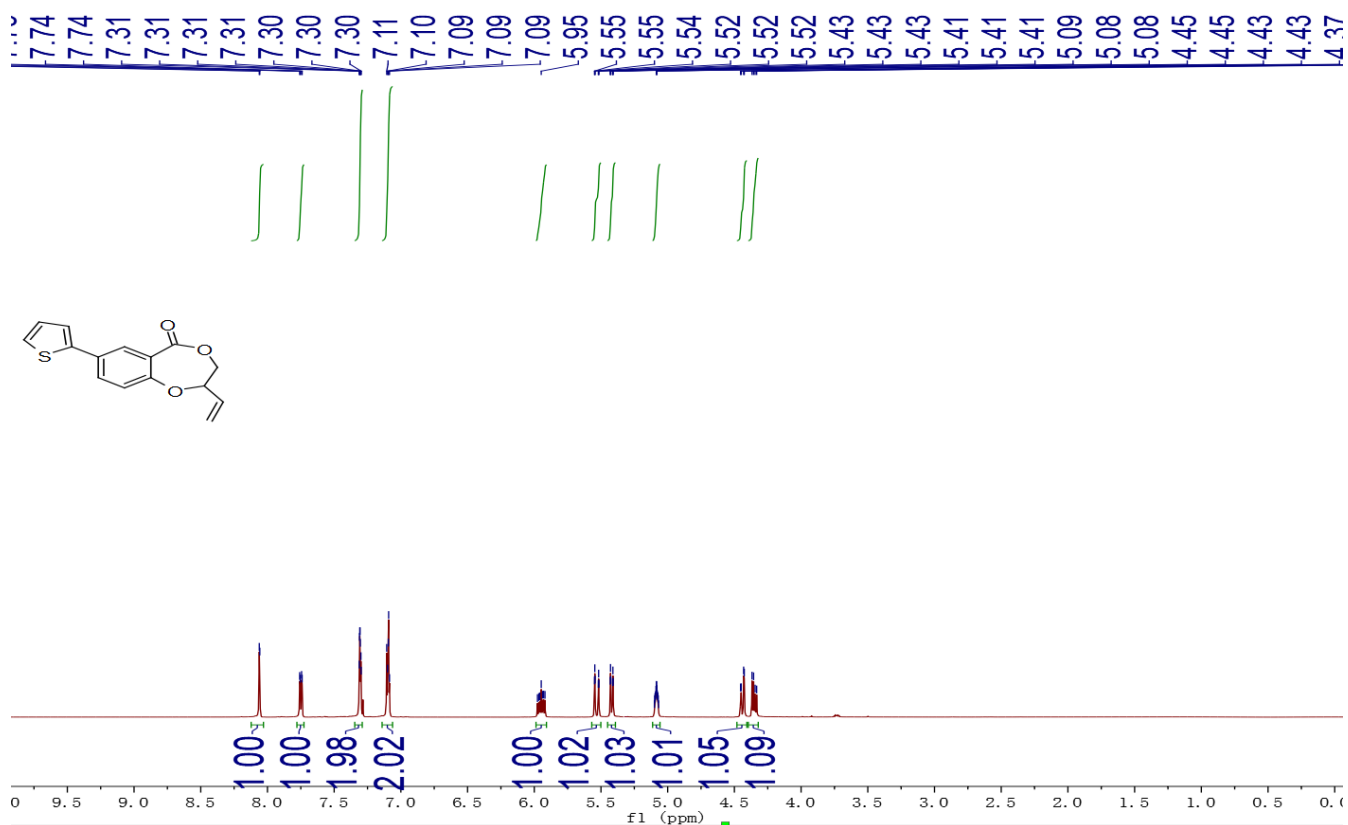

Figure 43.  $^{13}\text{C}$  NMR (151 MHz,  $\text{CDCl}_3$ ) spectrum of 2q

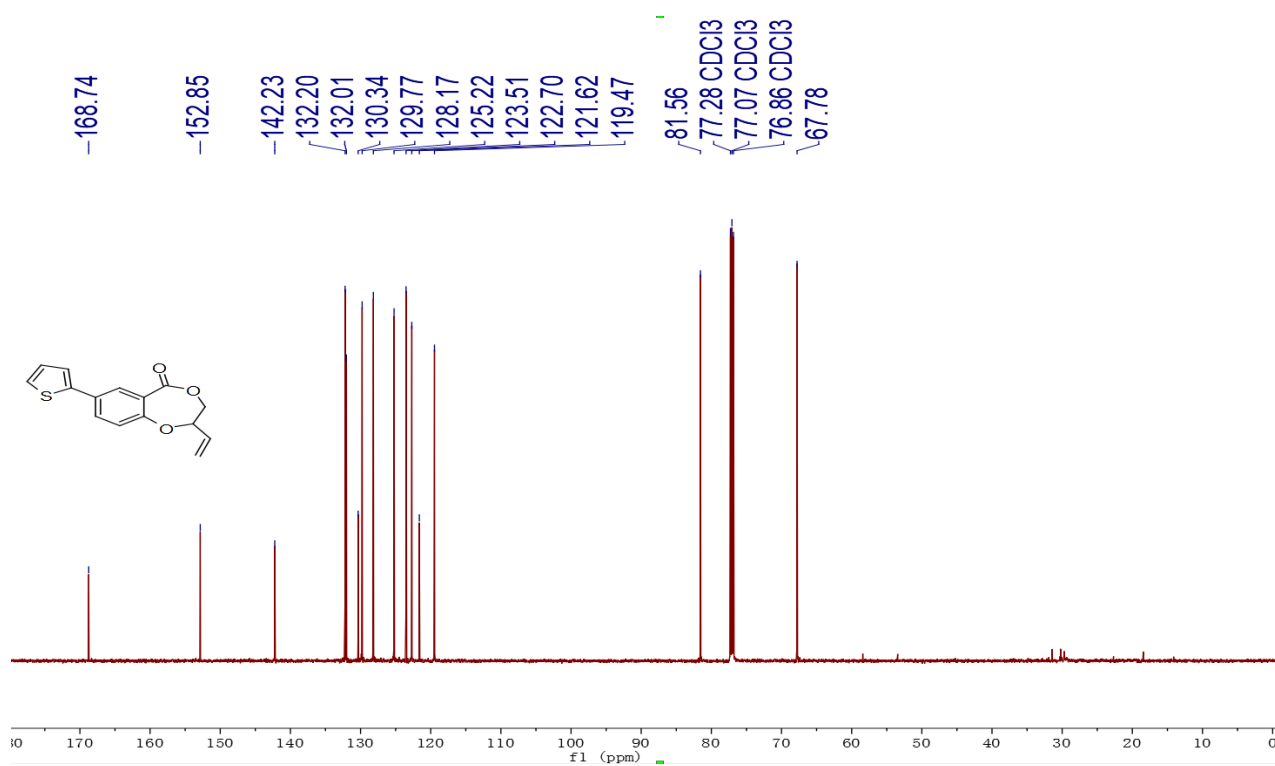

Figure 44.  $^1\text{H}$  NMR (600 MHz,  $\text{CDCl}_3$ ) spectrum of 2r

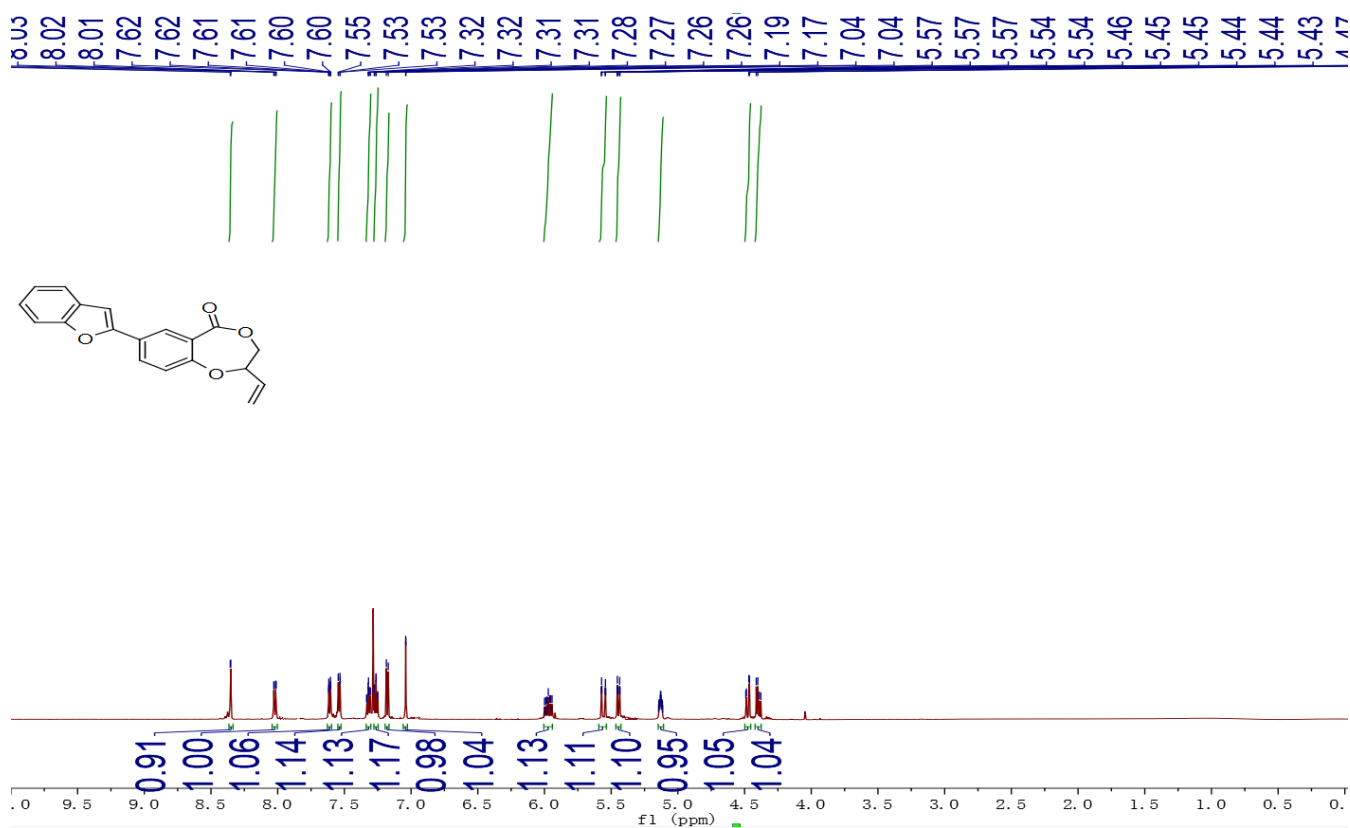

Figure 45.  $^{13}\text{C}$  NMR (151 MHz,  $\text{CDCl}_3$ ) spectrum of 2r

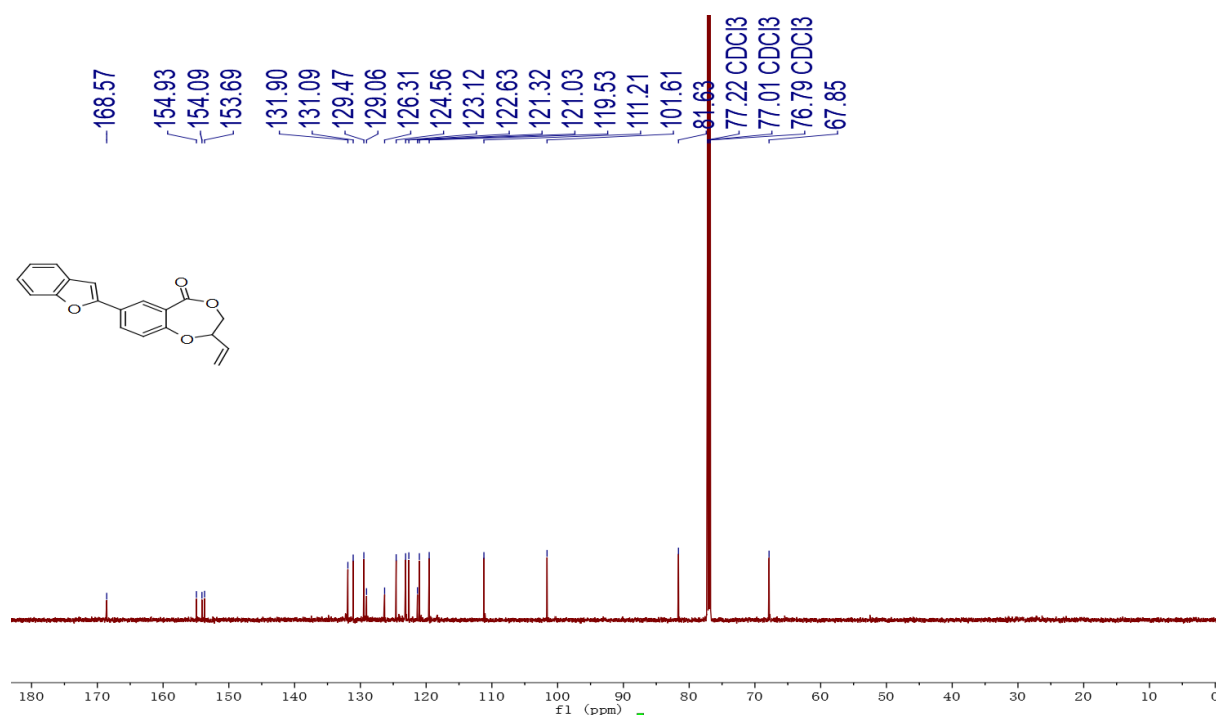

Figure 46.  $^1\text{H}$  NMR (600 MHz,  $\text{CDCl}_3$ ) spectrum of 2s

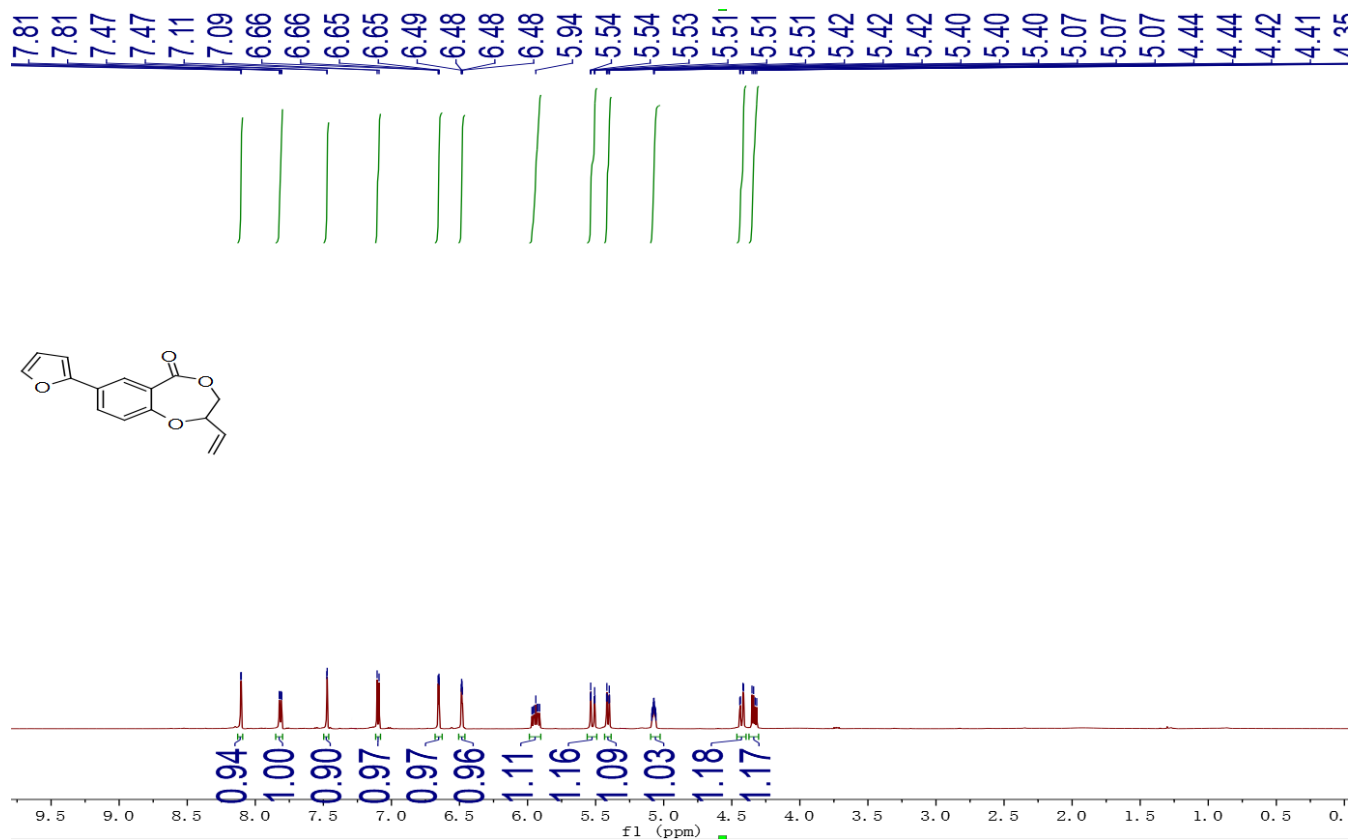

**Figure 47.**  $^{13}\text{C}$  NMR (151 MHz,  $\text{CDCl}_3$ ) spectrum of **2s**

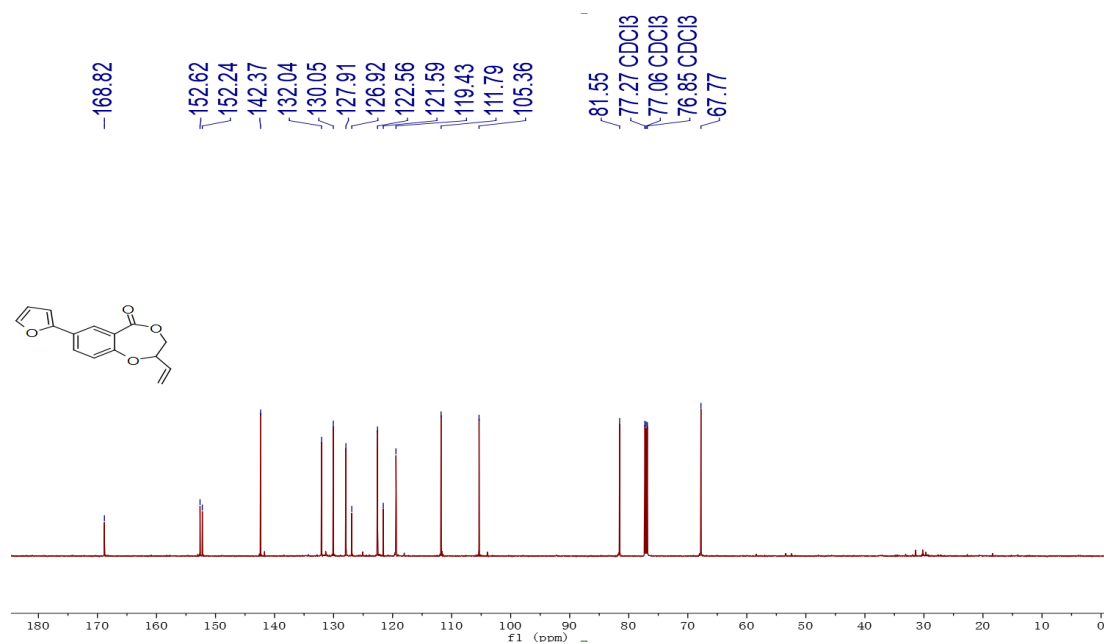

**Figure 48.**  $^1\text{H}$  NMR (600 MHz,  $\text{CDCl}_3$ ) spectrum of **2t**

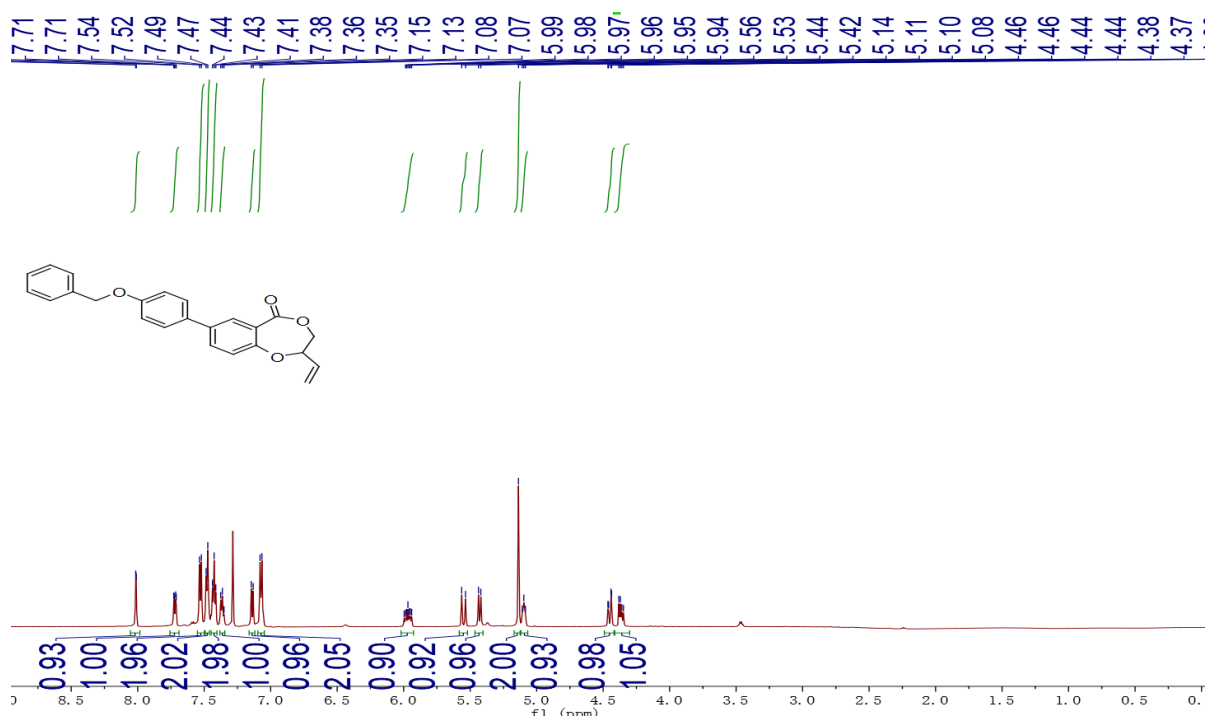

Figure 49.  $^{13}\text{C}$  NMR (151 MHz,  $\text{CDCl}_3$ ) spectrum of 2t

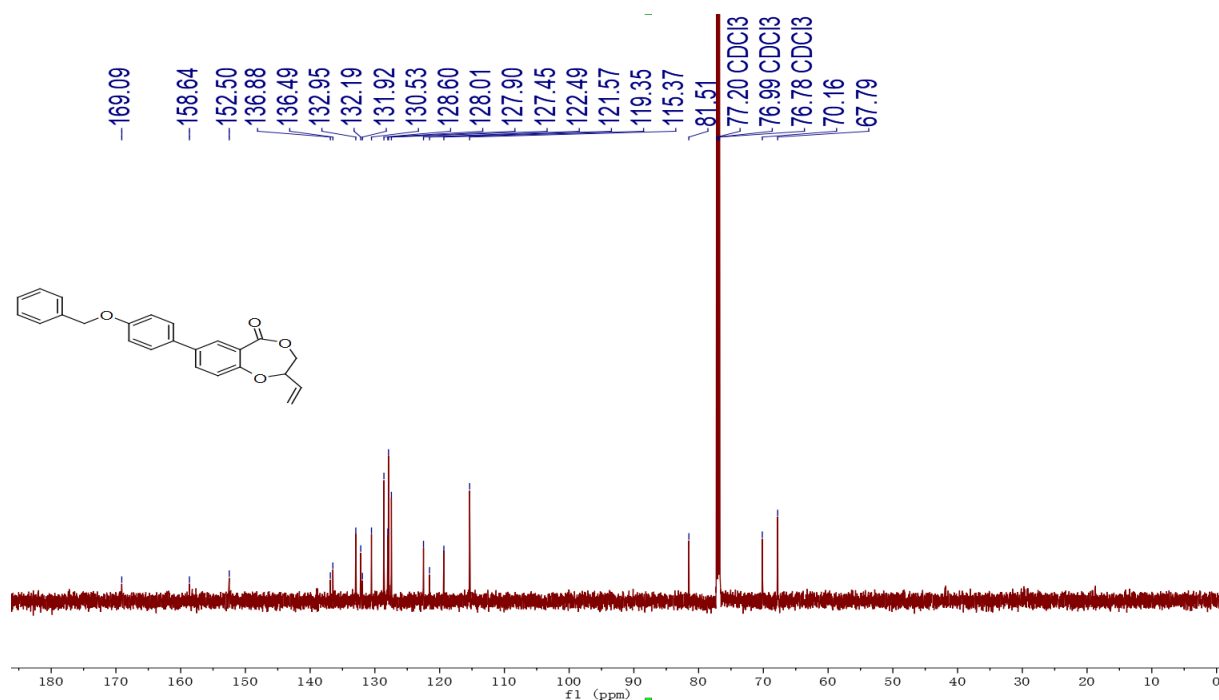

Figure 50.  $^1\text{H}$  NMR (600 MHz,  $\text{CDCl}_3$ ) spectrum of 2u

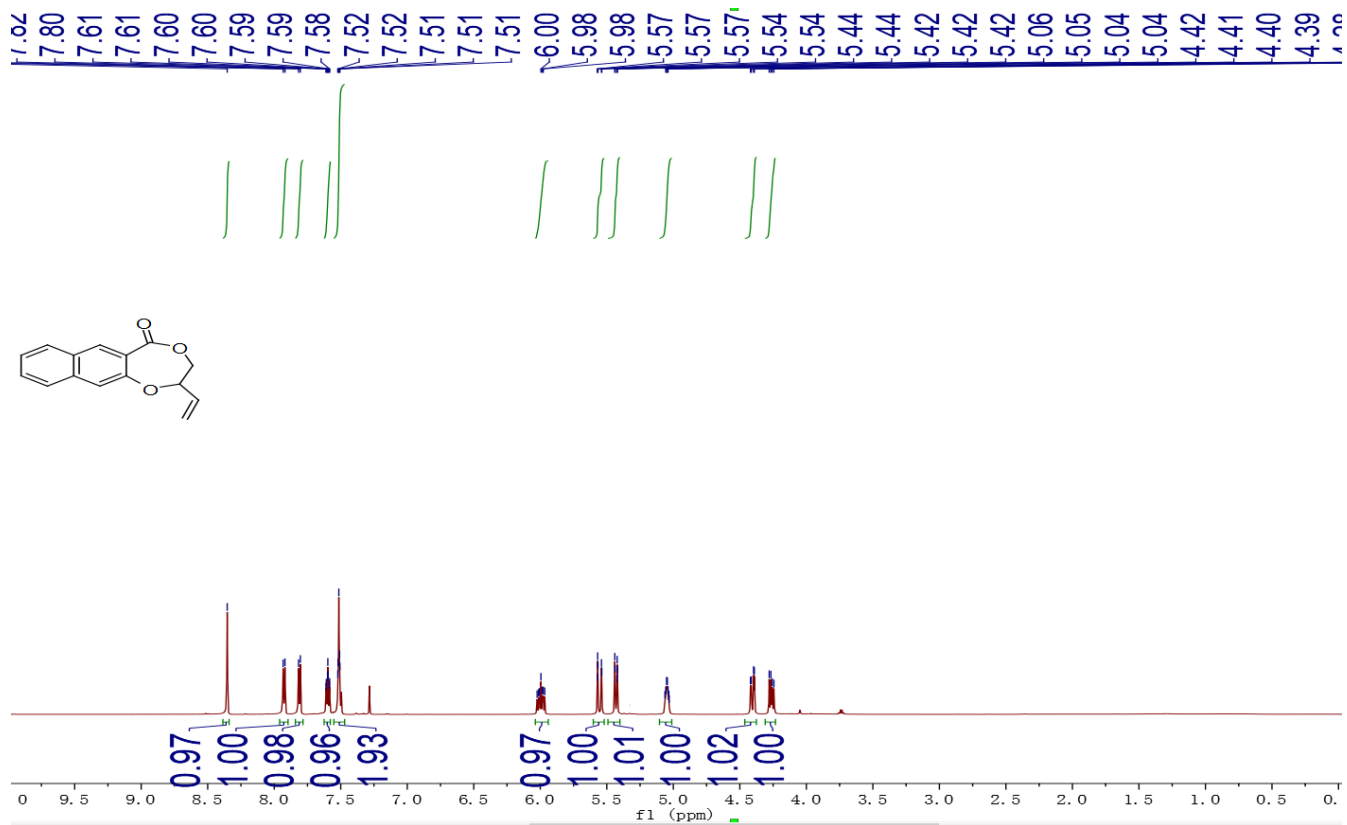



Figure 53.  $^{13}\text{C}$  NMR (151 MHz,  $\text{CDCl}_3$ ) spectrum of 2v

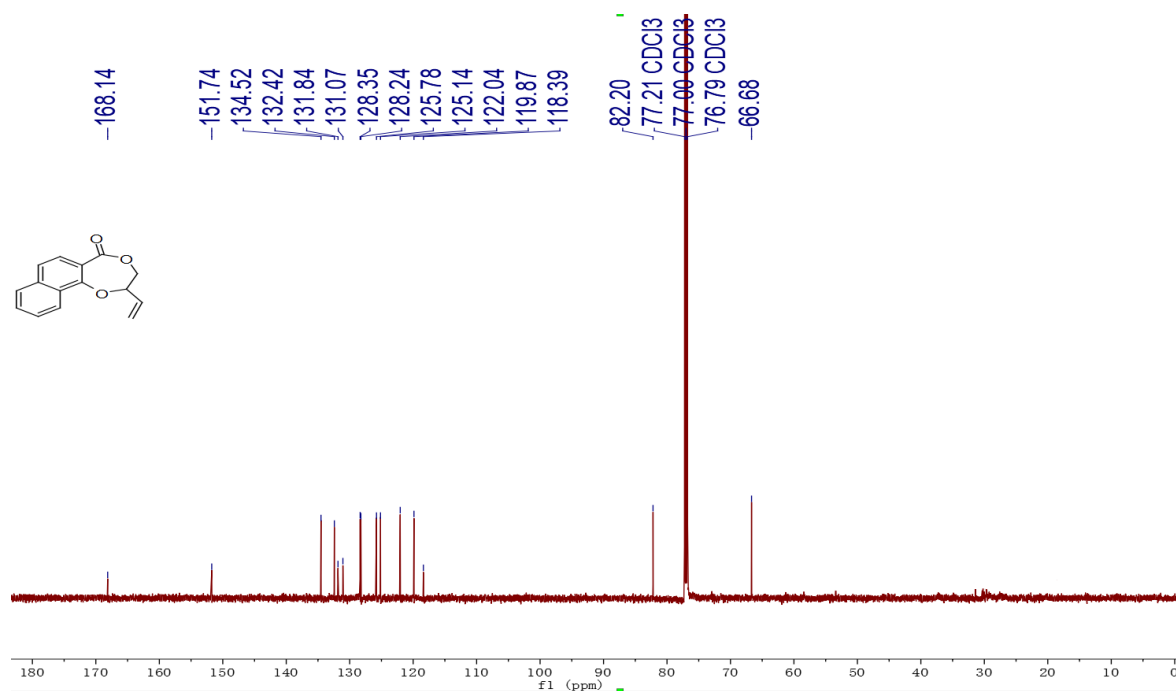

Figure 54.  $^1\text{H}$  NMR (600 MHz,  $\text{CDCl}_3$ ) spectrum of 2w

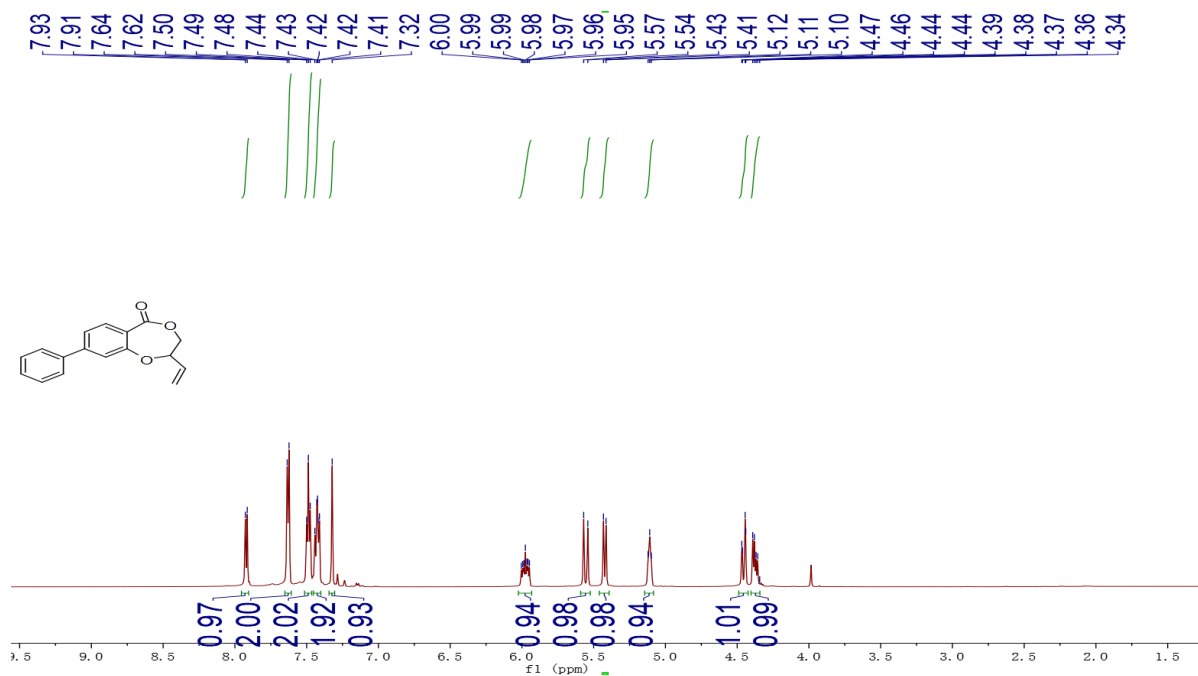



Figure 55.  $^{13}\text{C}$  NMR (151 MHz,  $\text{CDCl}_3$ ) spectrum of 2w

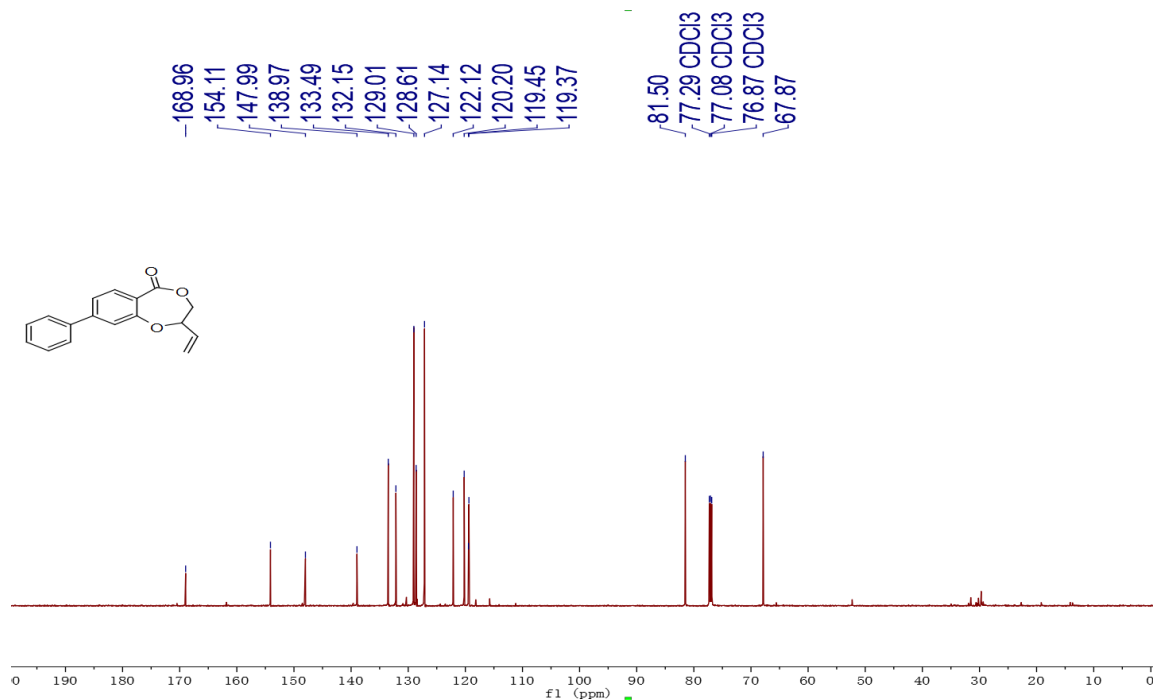

Figure 56.  $^1\text{H}$  NMR (600 MHz,  $\text{CDCl}_3$ ) spectrum of 2x

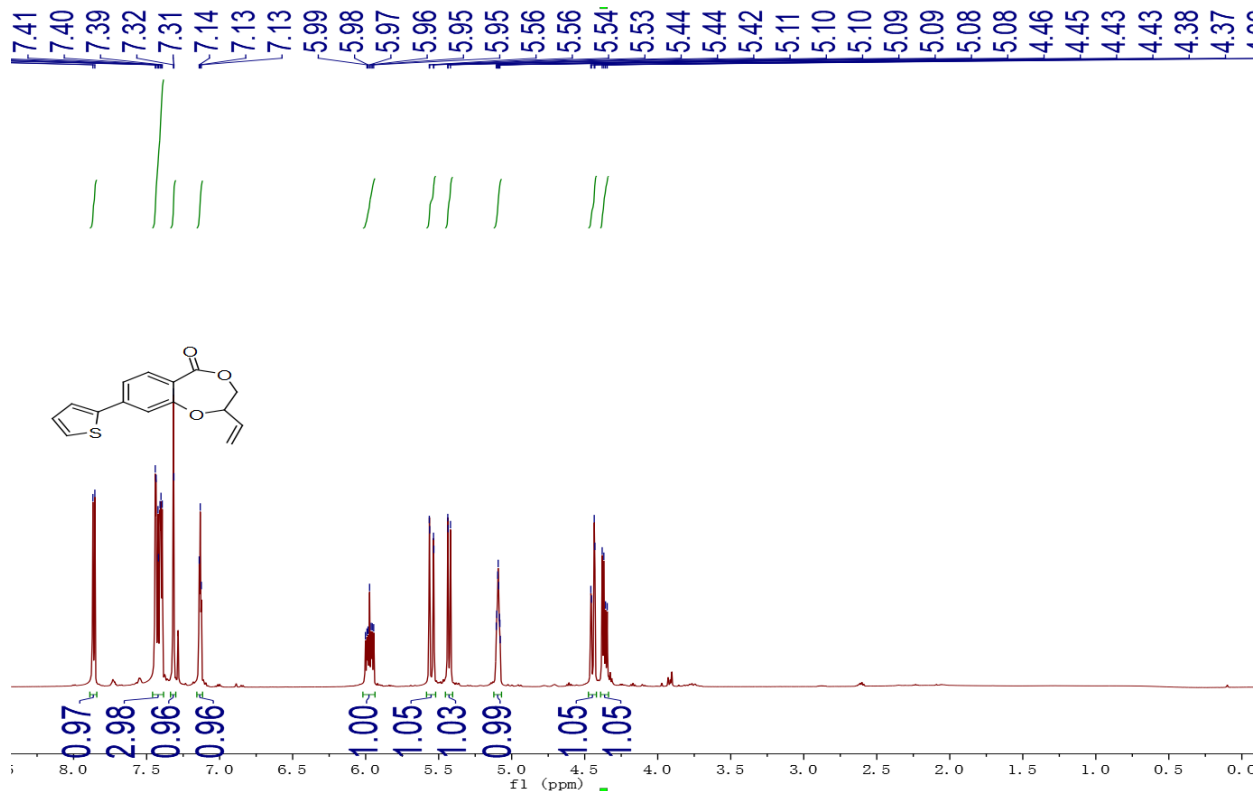

Figure 57.  $^{13}\text{C}$  NMR (151 MHz,  $\text{CDCl}_3$ ) spectrum of 2x

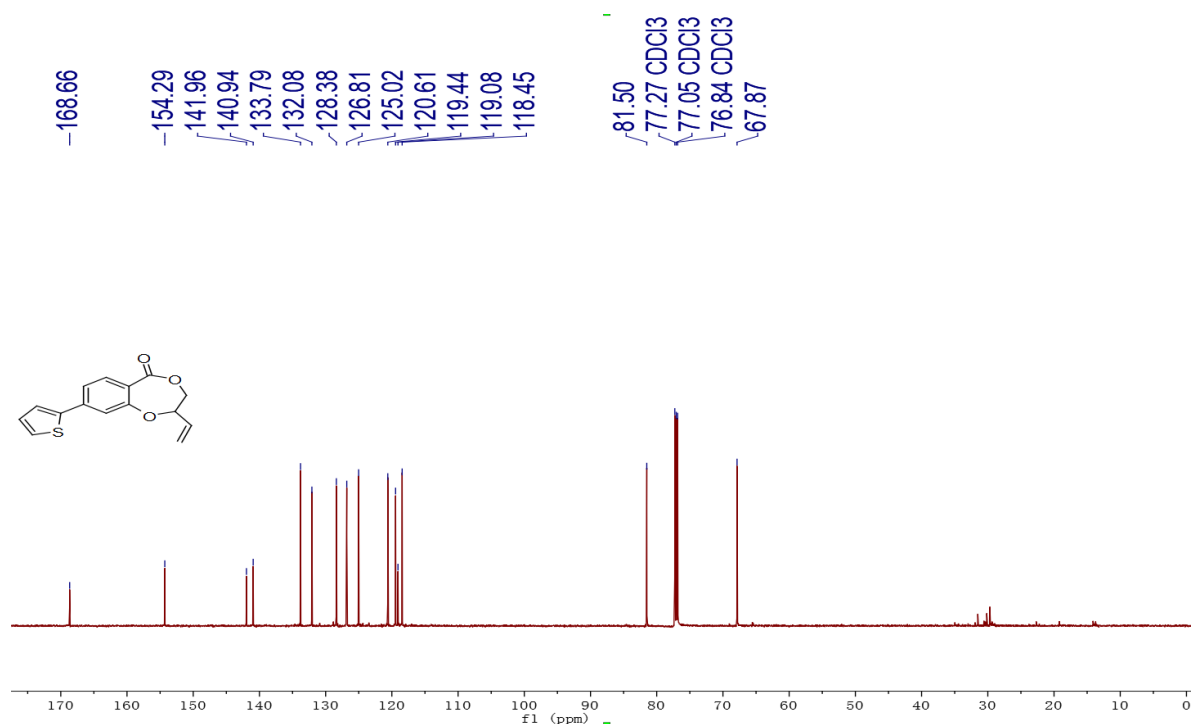

Figure 58.  $^1\text{H}$  NMR (600 MHz,  $\text{CDCl}_3$ ) spectrum of 2a'

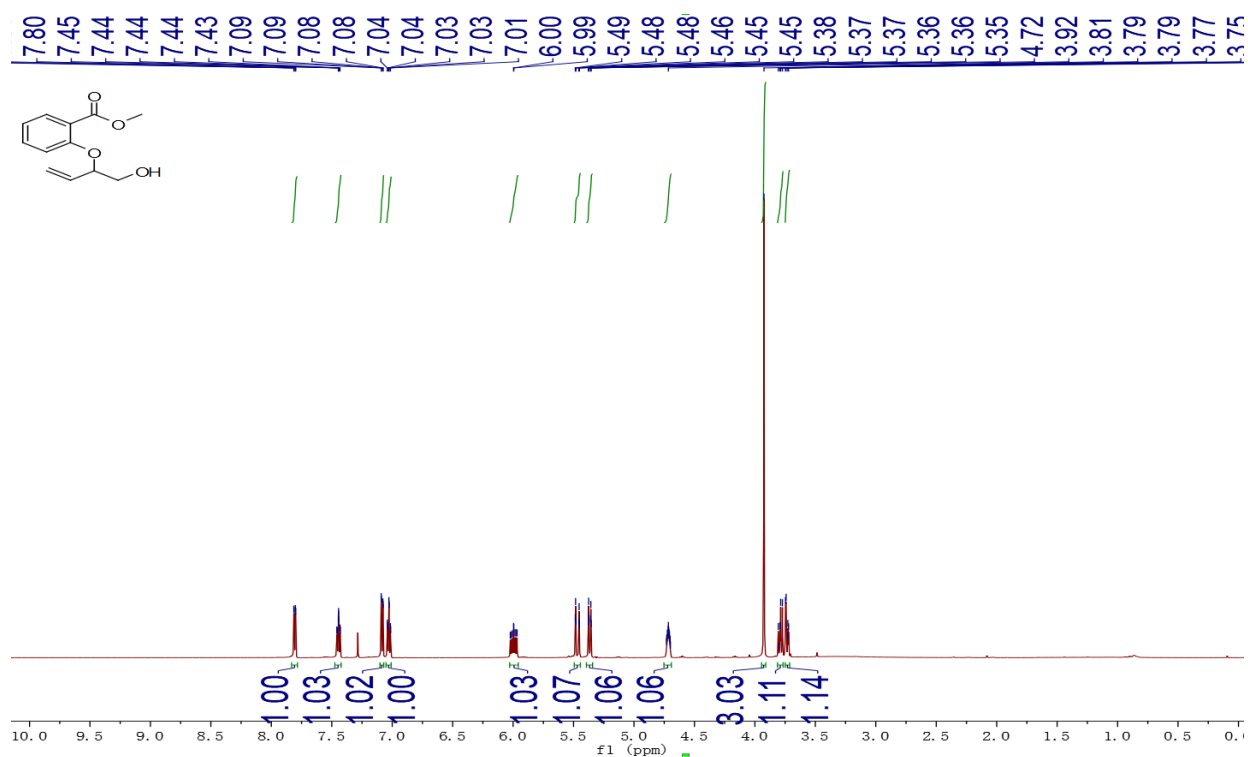

Figure 59.  $^{13}\text{C}$  NMR (151 MHz,  $\text{CDCl}_3$ ) spectrum of **2a'**

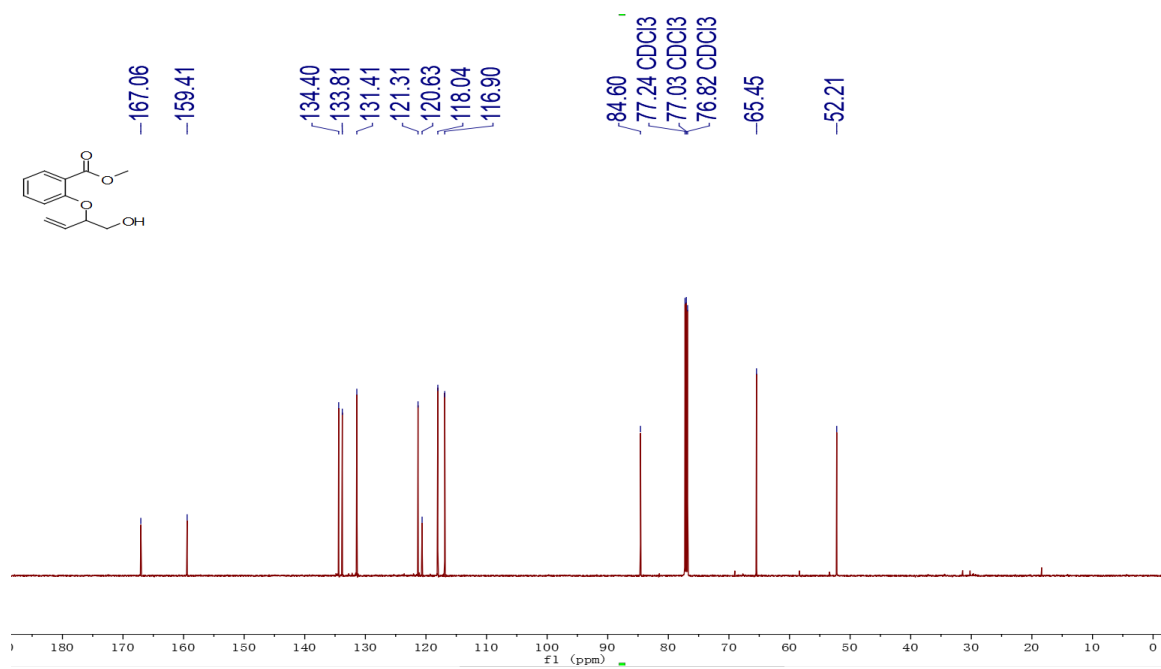

## 5. Copies of HPLC Chromatograms

Figure 60. HPLC spectra of 2a

2a (The top one is racemic, and the bottom one is chiral)

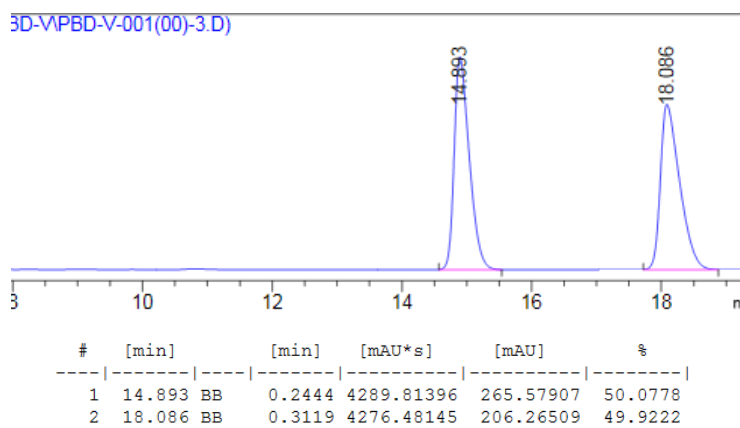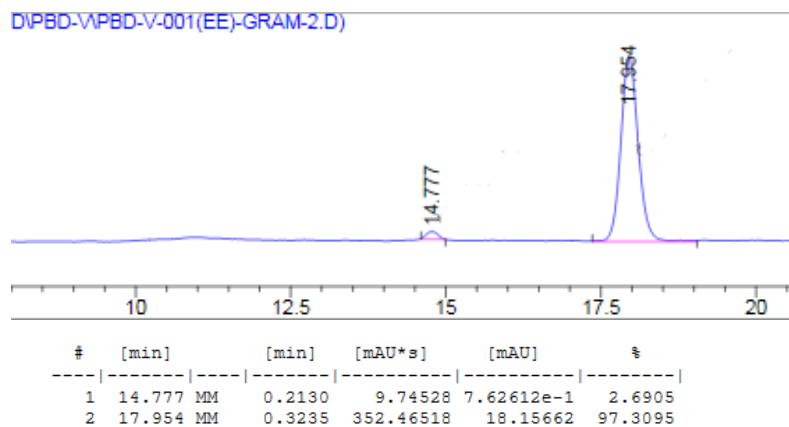

## Figure 61. HPLC spectra of 2b

2b (The top one is racemic, and the bottom one is chiral)

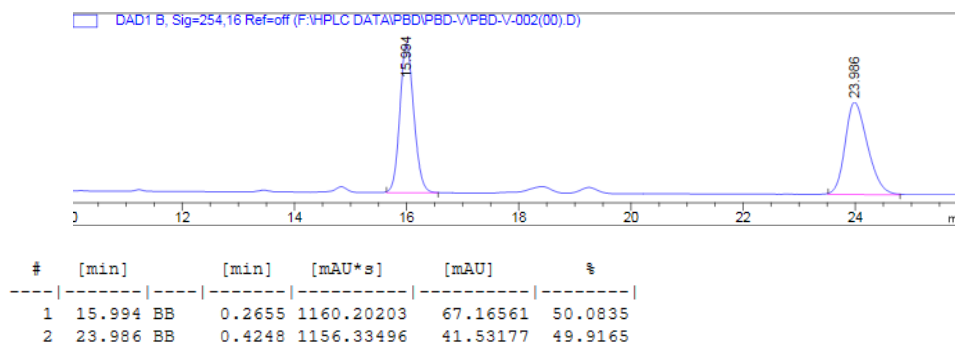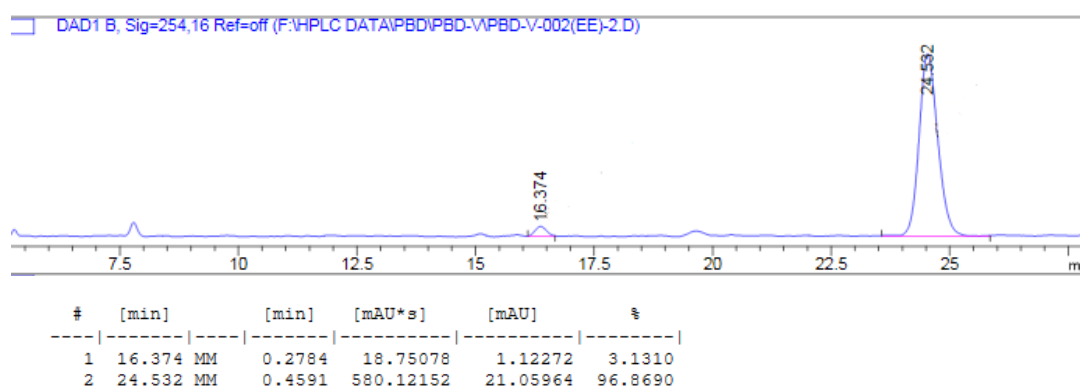

## Figure 62. HPLC spectra of 2c

2c (The top one is racemic, and the bottom one is chiral)

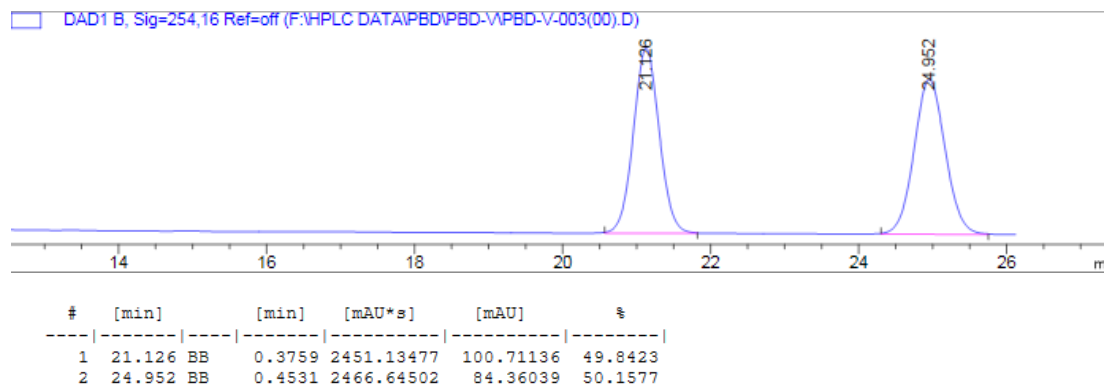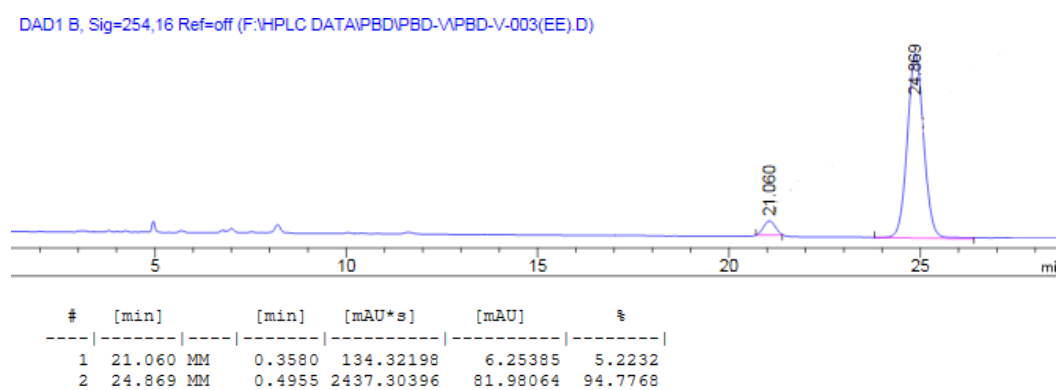

### Figure 63. HPLC spectra of 2d

2d (The top one is racemic, and the bottom one is chiral)

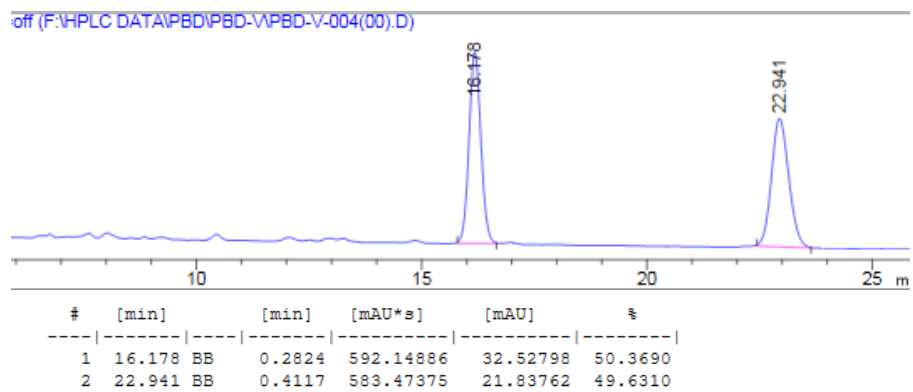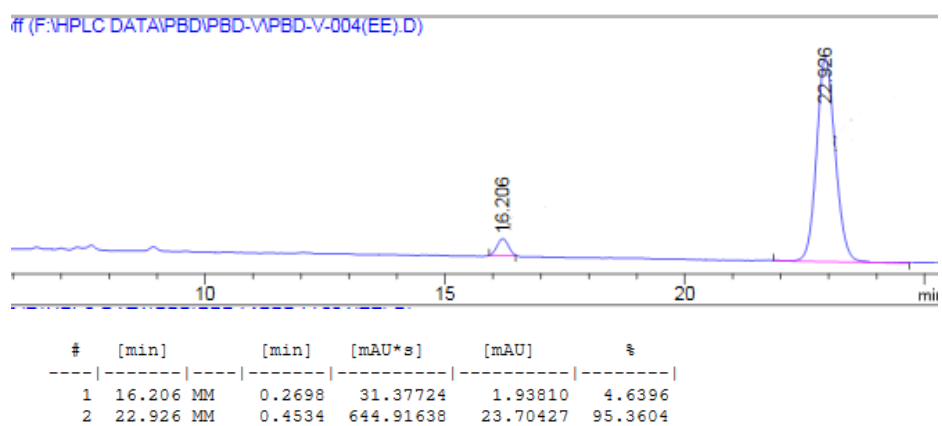

## Figure 64. HPLC spectra of 2e

2e (The top one is racemic, and the bottom one is chiral)

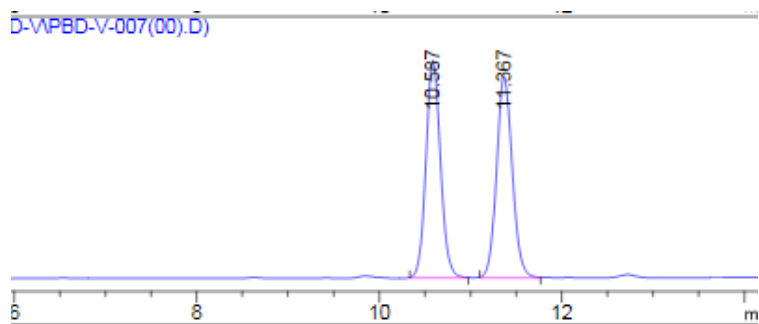

| # | [min]  | [min] | [mAU*s] | [mAU]     | %        |         |
|---|--------|-------|---------|-----------|----------|---------|
| 1 | 10.587 | BB    | 0.1711  | 801.53479 | 72.42214 | 49.9858 |
| 2 | 11.367 | BB    | 0.1857  | 801.99152 | 66.97631 | 50.0142 |

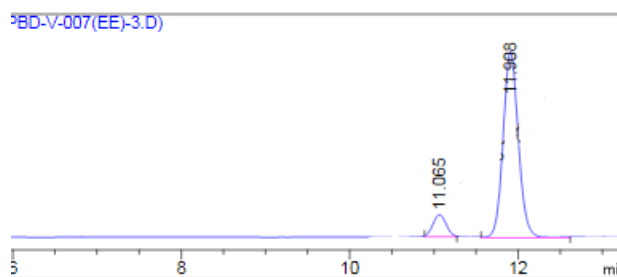

| # | [min]  | [min] | [mAU*s] | [mAU]     | %        |         |
|---|--------|-------|---------|-----------|----------|---------|
| 1 | 11.065 | MM    | 0.1813  | 46.79551  | 4.30297  | 9.2101  |
| 2 | 11.908 | MM    | 0.2097  | 461.29376 | 36.66157 | 90.7899 |



## Figure 65. HPLC spectra of 2f

2f (The top one is racemic, and the bottom one is chiral)

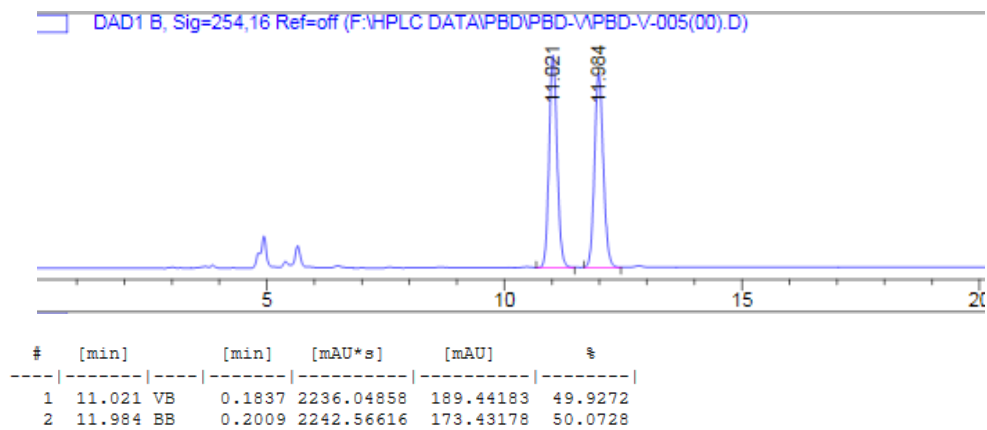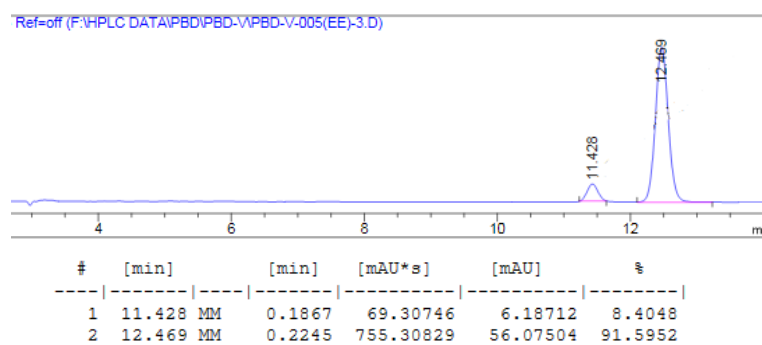

## Figure 66. HPLC spectra of 2g

2g (The top one is racemic, and the bottom one is chiral)

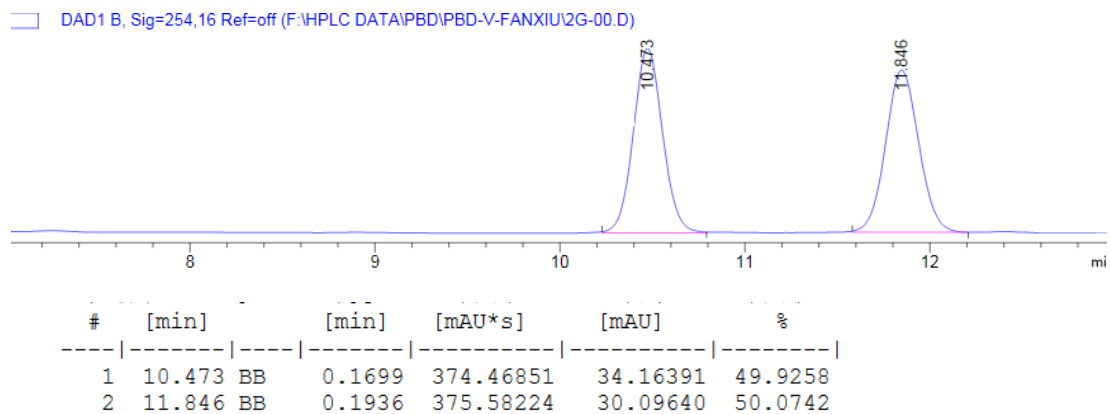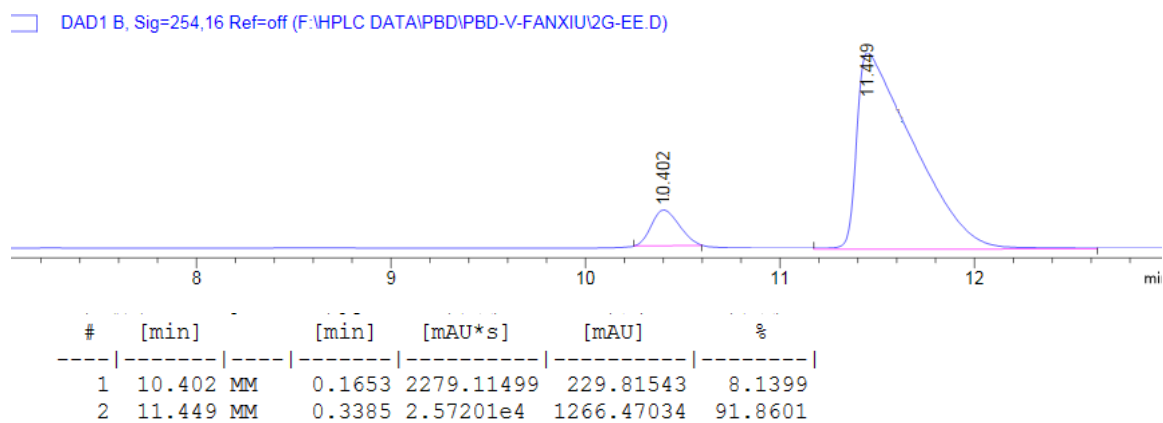

## Figure 67. HPLC spectra of 2h

2h (The top one is racemic, and the bottom one is chiral)

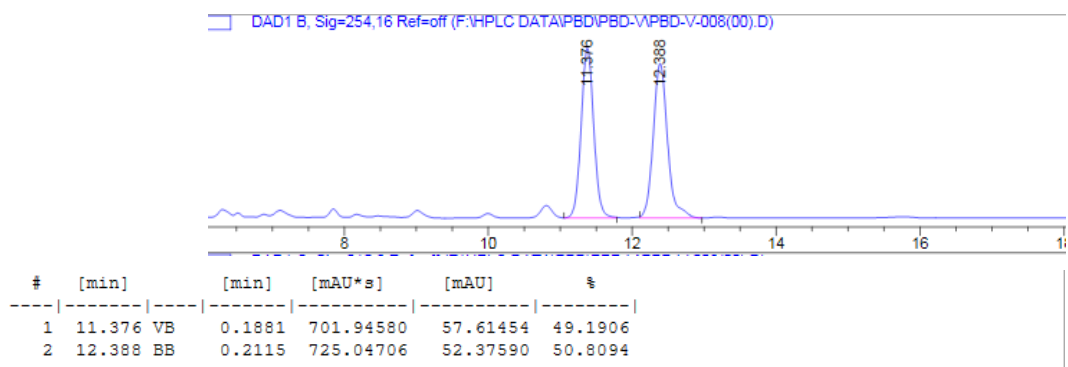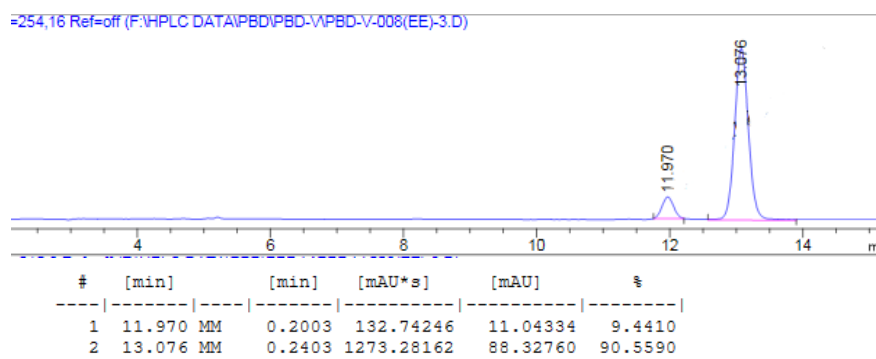

## Figure 68. HPLC spectra of 2i

2i (The top one is racemic, and the bottom one is chiral)

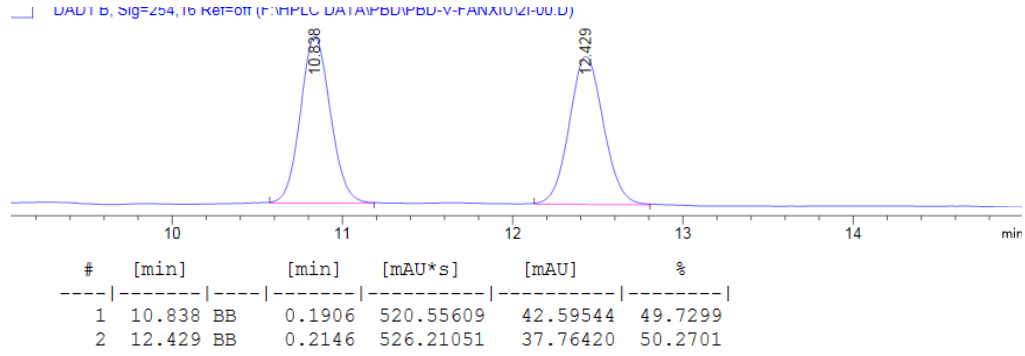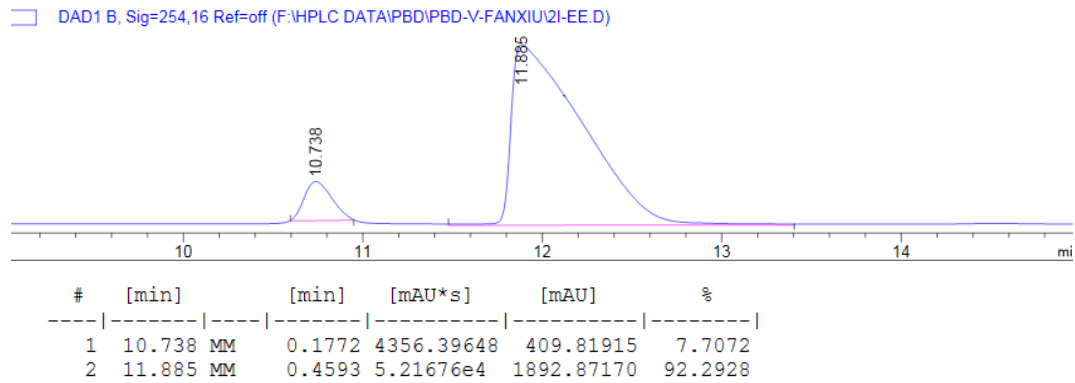

## Figure 69. HPLC spectra of 2j

2j (The top one is racemic, and the bottom one is chiral)

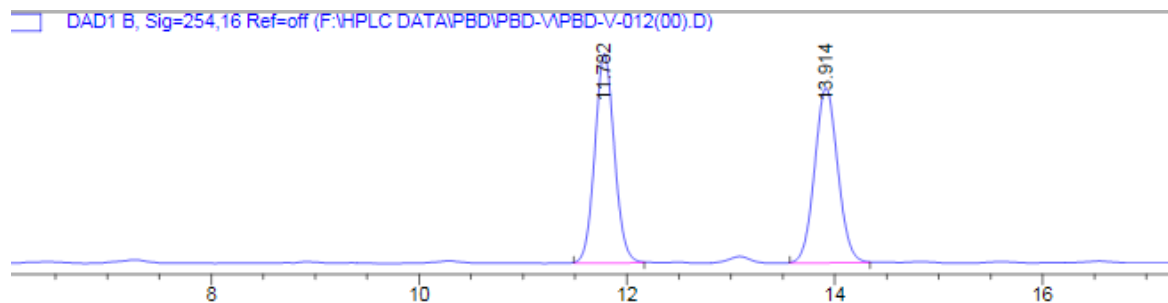

| # | [min]  | [min] | [mAU*s] | [mAU]     | %        |         |
|---|--------|-------|---------|-----------|----------|---------|
| 1 | 11.782 | BB    | 0.2025  | 800.08167 | 61.19202 | 50.2849 |
| 2 | 13.914 | BB    | 0.2404  | 791.01581 | 51.15328 | 49.7151 |

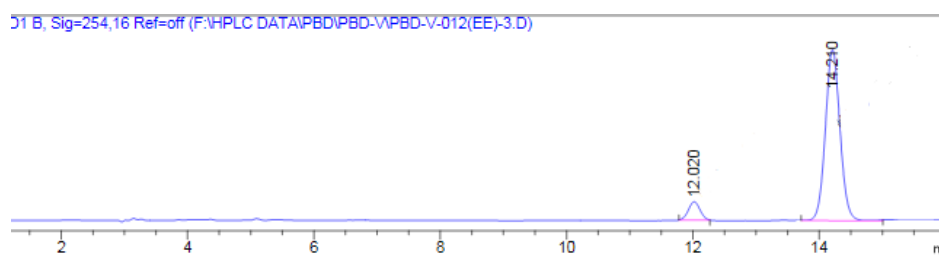

| # | [min]  | [min] | [mAU*s] | [mAU]     | %        |         |
|---|--------|-------|---------|-----------|----------|---------|
| 1 | 12.020 | MM    | 0.2138  | 59.61893  | 4.64657  | 7.9371  |
| 2 | 14.210 | MM    | 0.2671  | 691.52136 | 43.14197 | 92.0629 |

## Figure 70. HPLC spectra of 2k

2k (The top one is racemic, and the bottom one is chiral)

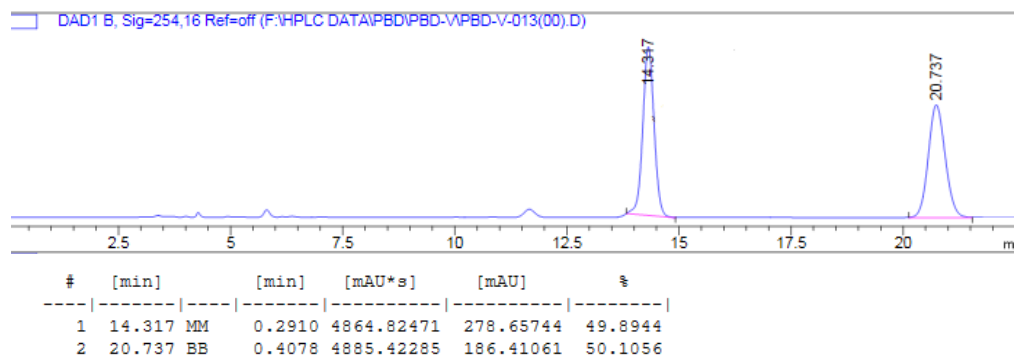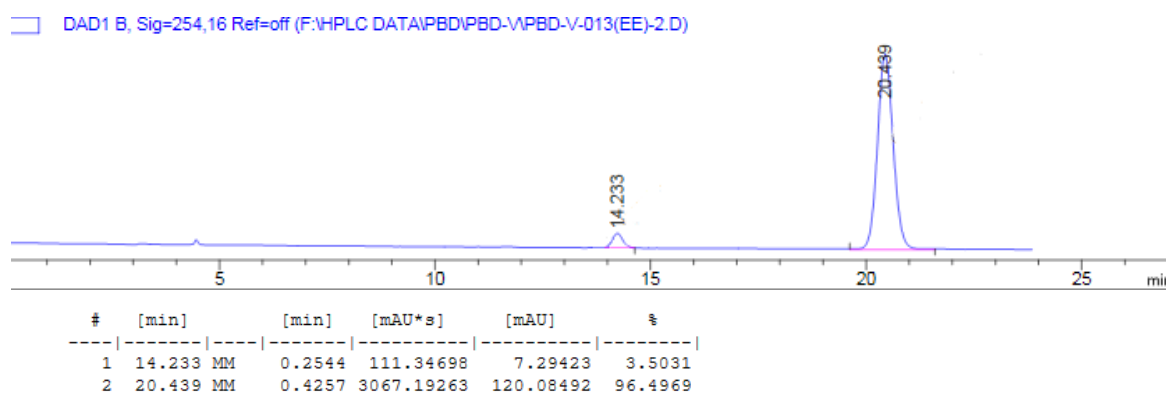

## Figure 71. HPLC spectra of 2l

2l (The top one is racemic, and the bottom one is chiral)

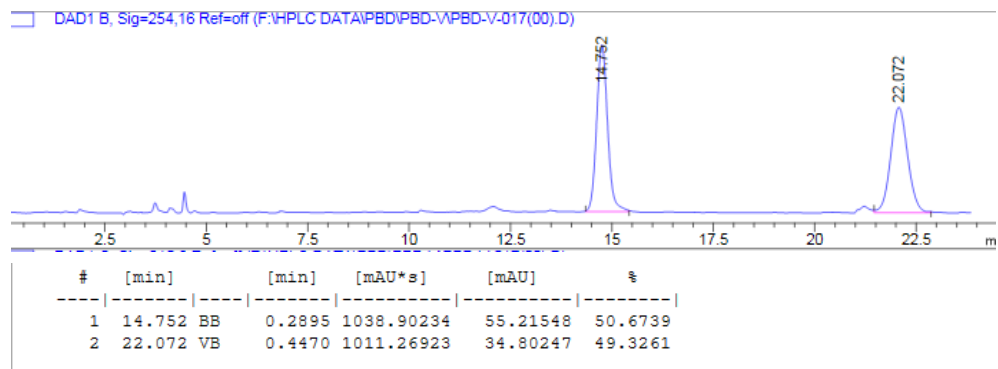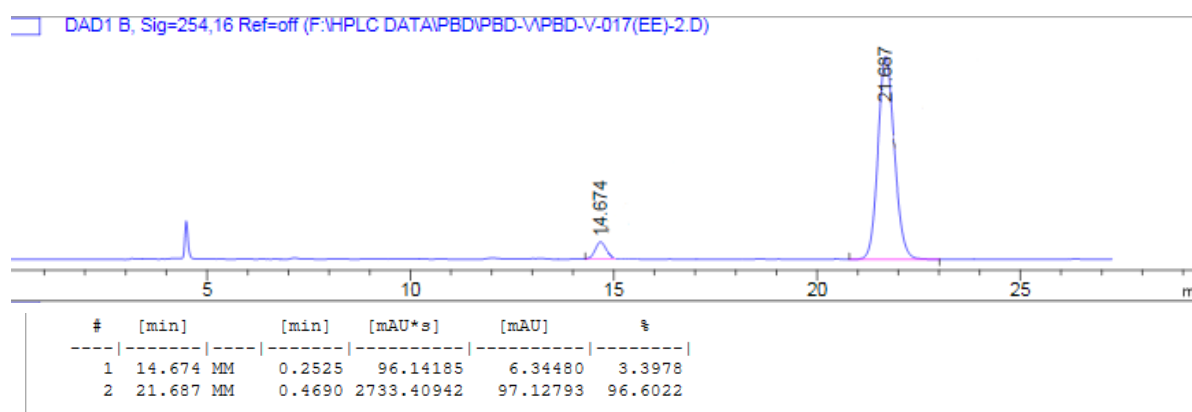

## Figure 72. HPLC spectra of 2m

2m (The top one is racemic, and the bottom one is chiral)

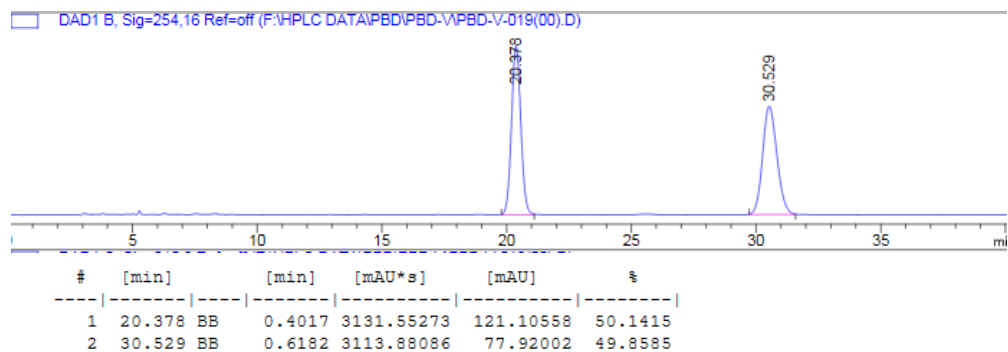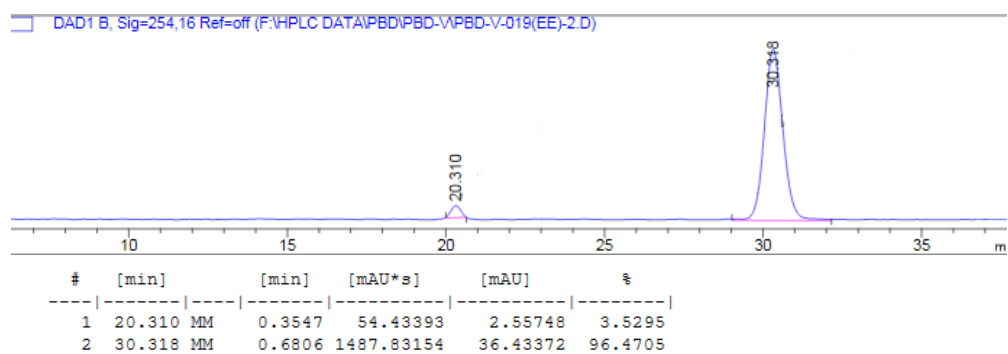



### Figure 73. HPLC spectra of 2n

2n (The top one is racemic, and the bottom one is chiral)

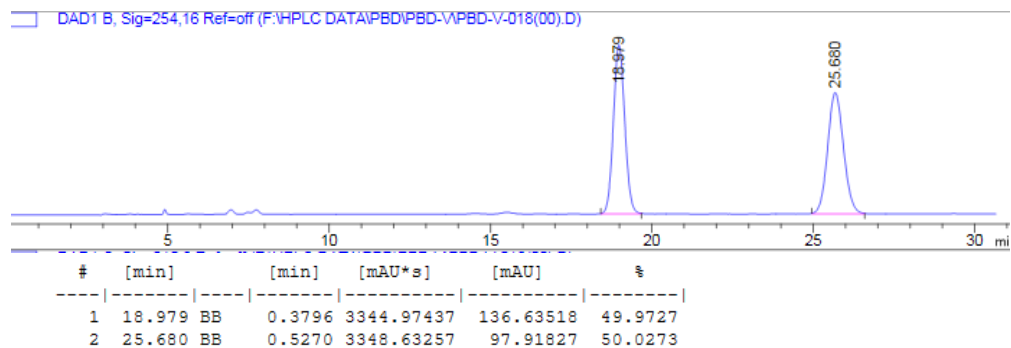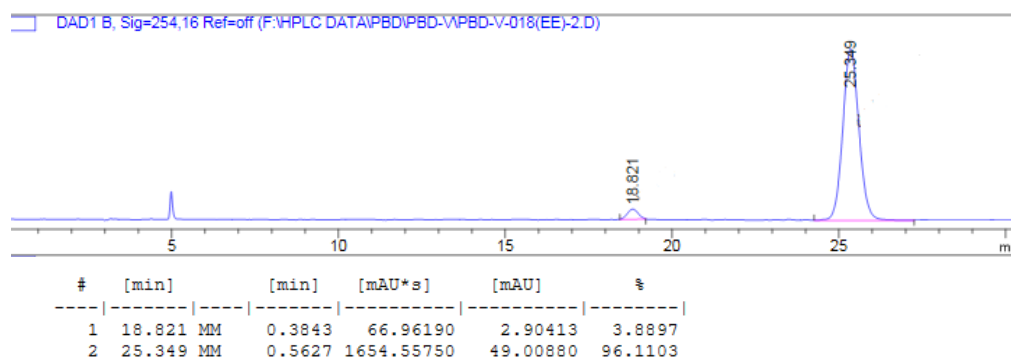

## Figure 74. HPLC spectra of 2o

2o (The top one is racemic, and the bottom one is chiral)

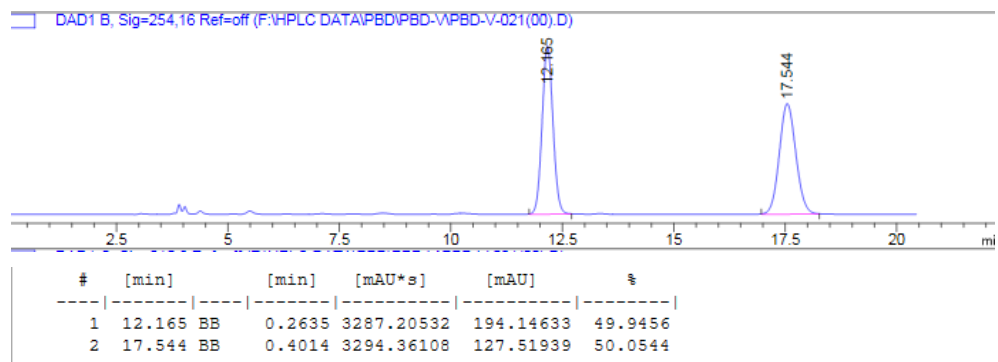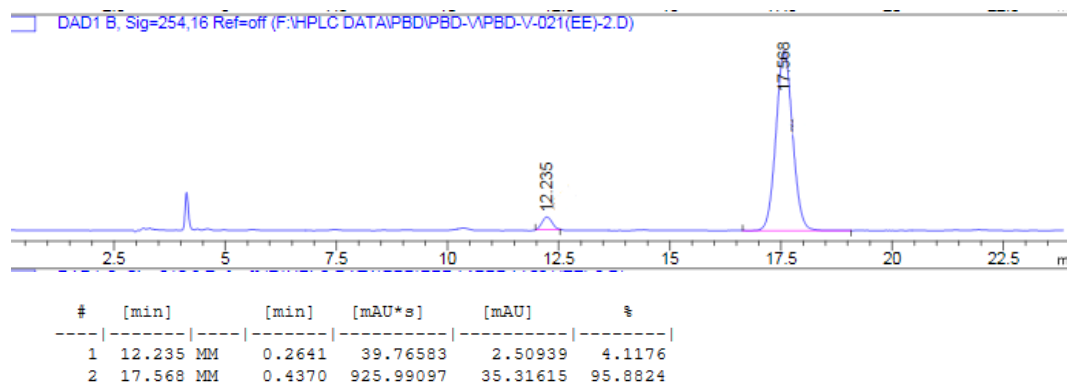

## Figure 75. HPLC spectra of 2p

2p (The top one is racemic, and the bottom one is chiral)

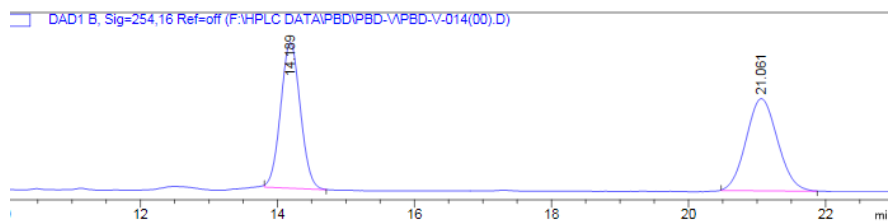

| # | [min]  | [min] | [mAU*s] | [mAU]     | %        |         |
|---|--------|-------|---------|-----------|----------|---------|
| 1 | 14.189 | BB    | 0.3082  | 289.72791 | 14.55804 | 49.6491 |
| 2 | 21.061 | BB    | 0.4826  | 293.82367 | 9.19985  | 50.3509 |

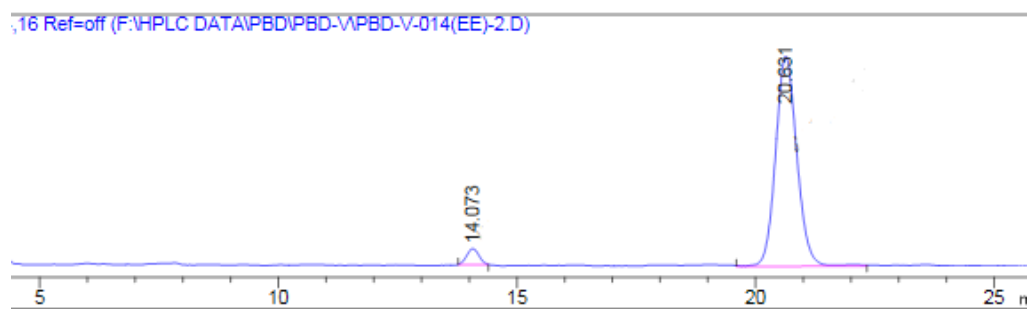

| # | [min]  | [min] | [mAU*s] | [mAU]     | %        |         |
|---|--------|-------|---------|-----------|----------|---------|
| 1 | 14.073 | MM    | 0.2982  | 40.77758  | 2.27890  | 4.2069  |
| 2 | 20.631 | MM    | 0.5163  | 928.51428 | 29.97207 | 95.7931 |

## Figure 76. HPLC spectra of 2q

2q (The top one is racemic, and the bottom one is chiral)

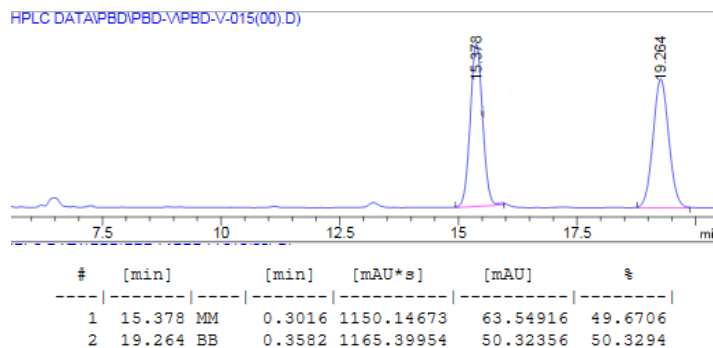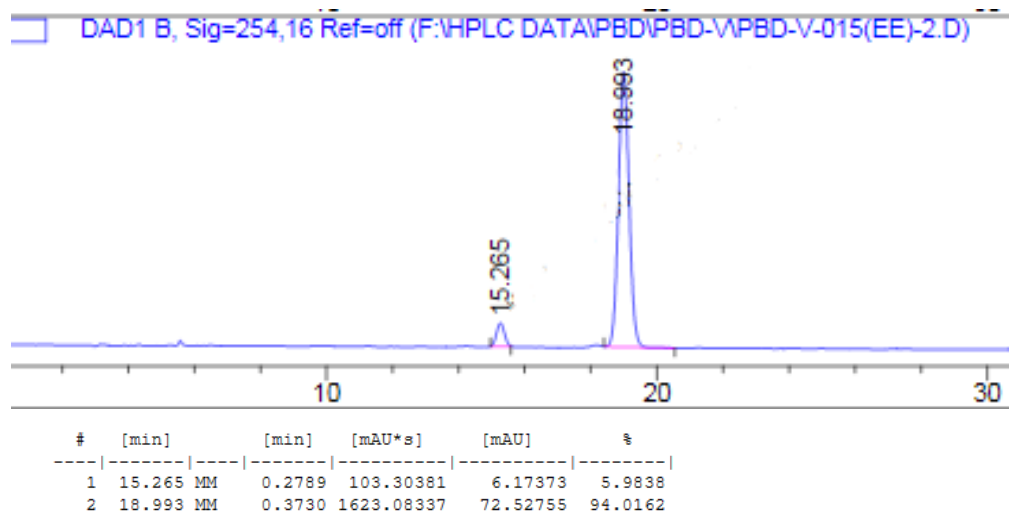

## Figure 77. HPLC spectra of 2r

2r (The top one is racemic, and the bottom one is chiral)

□ DAD1 B, Sig=254,16 Ref=off (F:\HPLC DATA\IPBD\IPBD-V-FANXIU\2R-00.D)

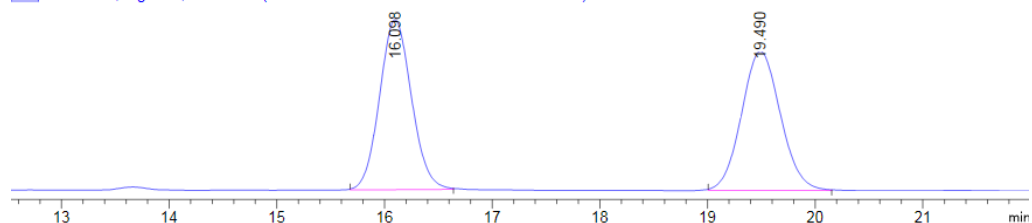

| # | [min]  | [min] | [mAU*s] | [mAU]     | %        |         |
|---|--------|-------|---------|-----------|----------|---------|
| 1 | 16.098 | BB    | 0.3203  | 762.84357 | 37.04345 | 50.0638 |
| 2 | 19.490 | BB    | 0.3887  | 760.89990 | 30.33063 | 49.9362 |

□ DAD1 B, Sig=254,16 Ref=off (F:\HPLC DATA\IPBD\IPBD-V-FANXIU\2R-EE.D)

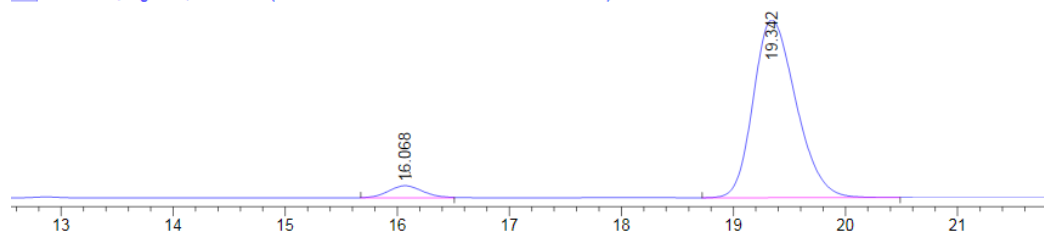

| # | [min]  | [min] | [mAU*s] | [mAU]      | %          |         |
|---|--------|-------|---------|------------|------------|---------|
| 1 | 16.068 | MM    | 0.3650  | 2246.31104 | 102.56203  | 5.3748  |
| 2 | 19.342 | BB    | 0.4108  | 3.95469e4  | 1494.13123 | 94.6252 |

## Figure 78. HPLC spectra of 2s

2s (The top one is racemic, and the bottom one is chiral)

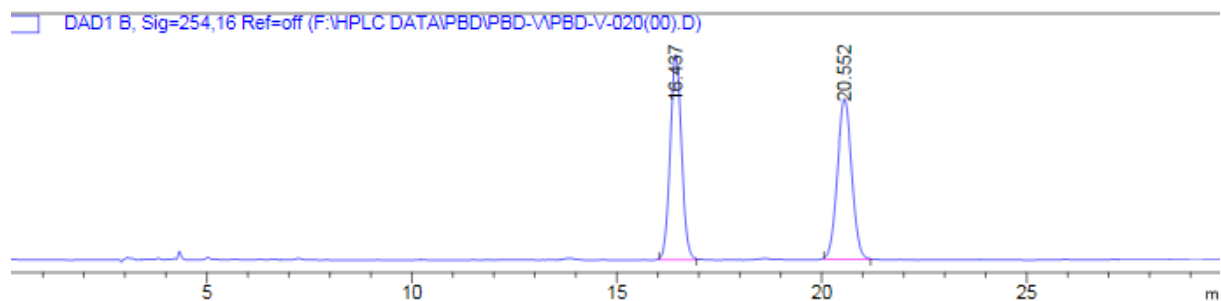

| # | [min]  | [min] | [mAU*s] | [mAU]     | %        |         |
|---|--------|-------|---------|-----------|----------|---------|
| 1 | 16.437 | BB    | 0.2955  | 812.93524 | 42.42744 | 50.1218 |
| 2 | 20.552 | BB    | 0.3777  | 808.98584 | 33.26333 | 49.8782 |

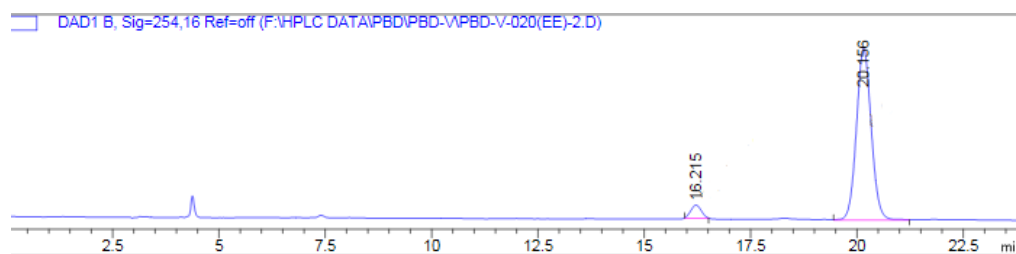

| # | [min]  | [min] | [mAU*s] | [mAU]      | %        |         |
|---|--------|-------|---------|------------|----------|---------|
| 1 | 16.215 | MM    | 0.2826  | 77.37508   | 4.56265  | 5.0062  |
| 2 | 20.156 | MM    | 0.4049  | 1468.20508 | 60.44203 | 94.9938 |

## Figure 79. HPLC spectra of 2t

2t (The top one is racemic, and the bottom one is chiral)

DAD1 B, Sig=254,16 Ref=off (F:\HPLC DATA\IPBD\IPBD-V-FANXIU2T-00.D)

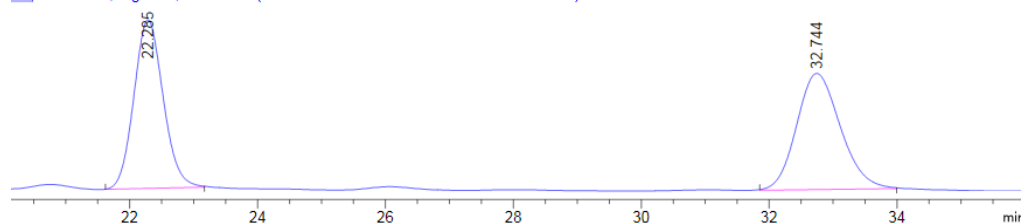

| # | [min]  | [min] | [mAU*s] | [mAU]      | %        |         |
|---|--------|-------|---------|------------|----------|---------|
| 1 | 22.285 | BB    | 0.4945  | 2965.10474 | 93.36535 | 49.2907 |
| 2 | 32.744 | BB    | 0.7282  | 3050.44336 | 64.21127 | 50.7093 |

DAD1 B, Sig=254,16 Ref=off (F:\HPLC DATA\IPBD\IPBD-V-FANXIU2T-EE.D)

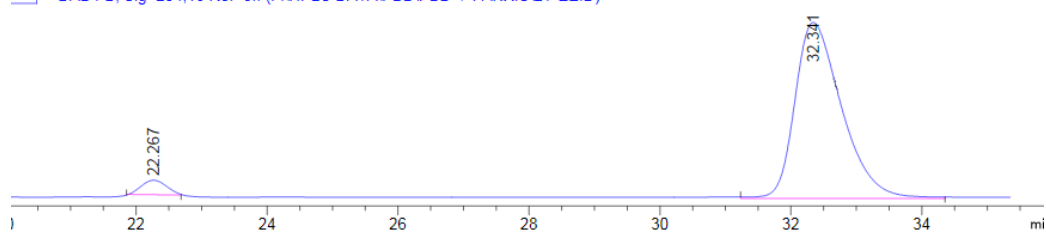

| # | [min]  | [min] | [mAU*s] | [mAU]      | %          |         |
|---|--------|-------|---------|------------|------------|---------|
| 1 | 22.267 | MM    | 0.4424  | 2599.37524 | 97.93482   | 4.1936  |
| 2 | 32.341 | MM    | 0.8295  | 5.93849e4  | 1193.21509 | 95.8064 |

## Figure 80. HPLC spectra of 2u

2u (The top one is racemic, and the bottom one is chiral)

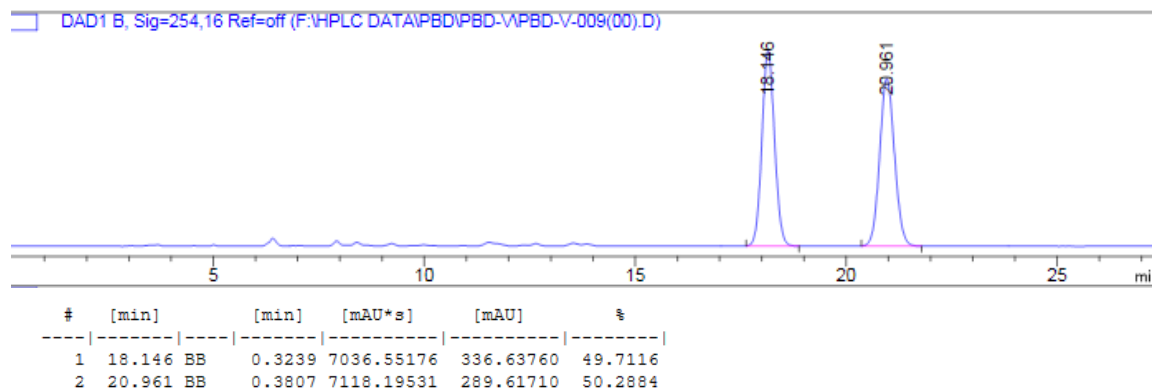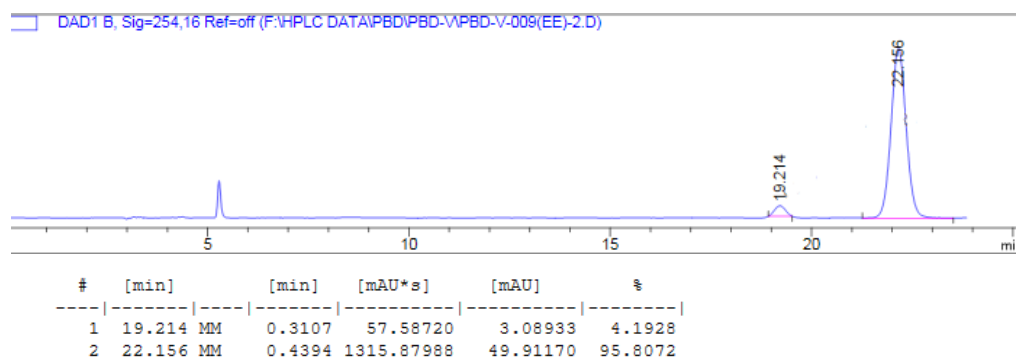



### Figure 81. HPLC spectra of 2v

2v (The top one is racemic, and the bottom one is chiral)

□ DAD1 B, Sig=254,16 Ref=off (F:\HPLC DATA\IPBD\IPBD-V-FANXIU\2V-00.D)

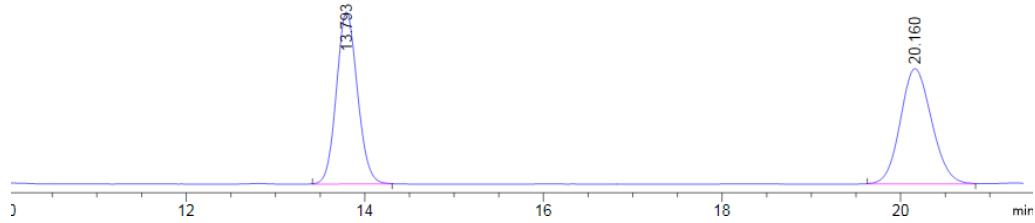

| # | [min]  |    | [min]  | [mAU*s]    | [mAU]     | %       |
|---|--------|----|--------|------------|-----------|---------|
| 1 | 13.793 | BB | 0.2526 | 2081.98267 | 127.41829 | 50.0122 |
| 2 | 20.160 | BB | 0.3785 | 2080.96680 | 85.33742  | 49.9878 |

□ DAD1 B, Sig=254,16 Ref=off (F:\HPLC DATA\IPBD\IPBD-V-FANXIU\2V-EE.D)

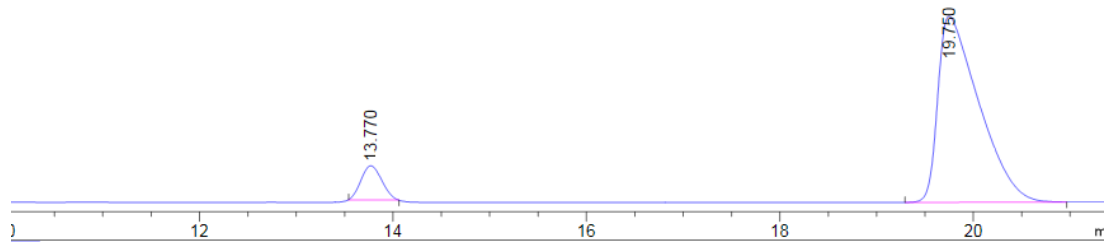

| # | [min]  |    | [min]  | [mAU*s]    | [mAU]     | %       |
|---|--------|----|--------|------------|-----------|---------|
| 1 | 13.770 | MM | 0.2493 | 2628.93848 | 175.75333 | 8.5464  |
| 2 | 19.750 | BB | 0.4379 | 2.81320e4  | 954.30780 | 91.4536 |

## Figure 82. HPLC spectra of 2w

2w (The top one is racemic, and the bottom one is chiral)

F:\HPLC DATA\IPBD\IPBD-V\IPBD-V-2W (00) .D

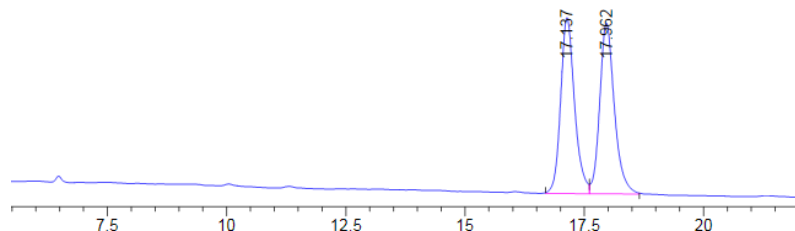

| # | [min]     | [min]  | [mAU*s]    | [mAU]    | %       |
|---|-----------|--------|------------|----------|---------|
| 1 | 17.137 BV | 0.3069 | 1122.89185 | 55.29107 | 49.4710 |
| 2 | 17.962 VB | 0.3256 | 1146.90820 | 53.61442 | 50.5290 |

F:\HPLC DATA\IPBD\IPBD-V\IPBD-V-2W (EE) .D

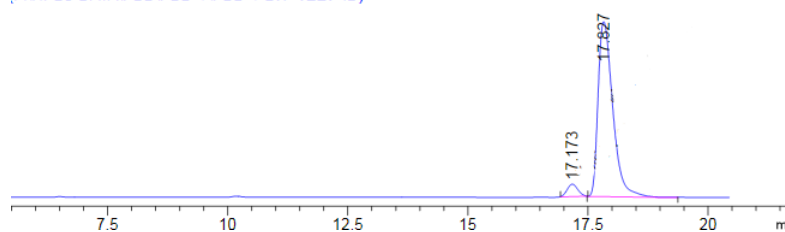

| # | [min]     | [min]  | [mAU*s]    | [mAU]      | %       |
|---|-----------|--------|------------|------------|---------|
| 1 | 17.173 MM | 0.2566 | 1855.86609 | 120.52266  | 4.8968  |
| 2 | 17.827 MM | 0.3562 | 3.60436e4  | 1686.44177 | 95.1032 |

### Figure 83. HPLC spectra of 2x

2x (The top one is racemic, and the bottom one is chiral)

DAD1 B, Sig=254,16 Ref=off (F:\HPLC DATA\IPBD\IPBD-VIPBD-V-2X (00) .D)

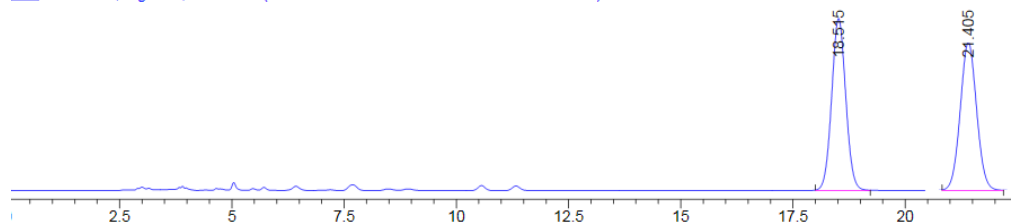

| # | [min]  |    | [min]  | [mAU*s]    | [mAU]     | %       |
|---|--------|----|--------|------------|-----------|---------|
| 1 | 18.515 | BB | 0.3391 | 3857.86328 | 176.43678 | 49.9800 |
| 2 | 21.405 | BB | 0.3943 | 3860.95459 | 152.04774 | 50.0200 |

DAD1 B, Sig=254,16 Ref=off (F:\HPLC DATA\IPBD\IPBD-VIPBD-V-2X (EE) .D)

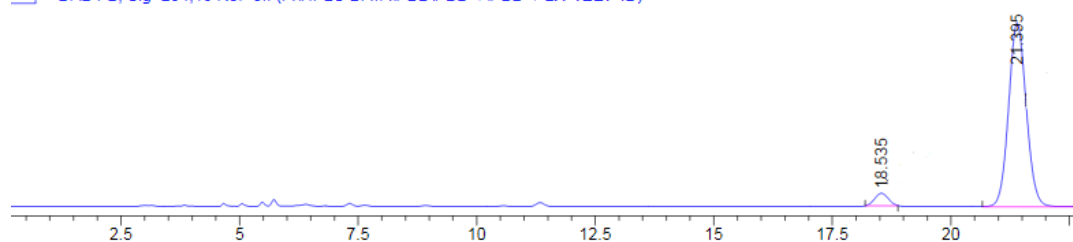

| # | [min]  |    | [min]  | [mAU*s]    | [mAU]     | %       |
|---|--------|----|--------|------------|-----------|---------|
| 1 | 18.535 | MM | 0.3277 | 1198.11206 | 60.93665  | 4.8227  |
| 2 | 21.395 | MM | 0.4330 | 2.36448e4  | 910.03833 | 95.1773 |

**Figure 84. HPLC spectra of 2a'**

**2a'** (The top one is racemic, and the bottom one is chiral)

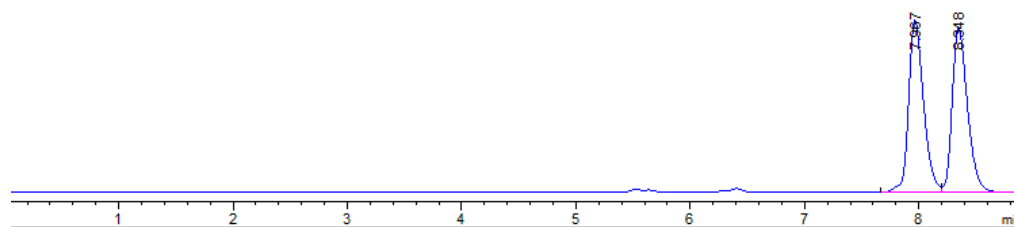

| # | [min]    | [min]  | [mAU*s]    | [mAU]     | %       |
|---|----------|--------|------------|-----------|---------|
| 1 | 7.967 BV | 0.1383 | 7161.58398 | 785.83820 | 50.4914 |
| 2 | 8.348 VB | 0.1453 | 7022.18359 | 749.34332 | 49.5086 |

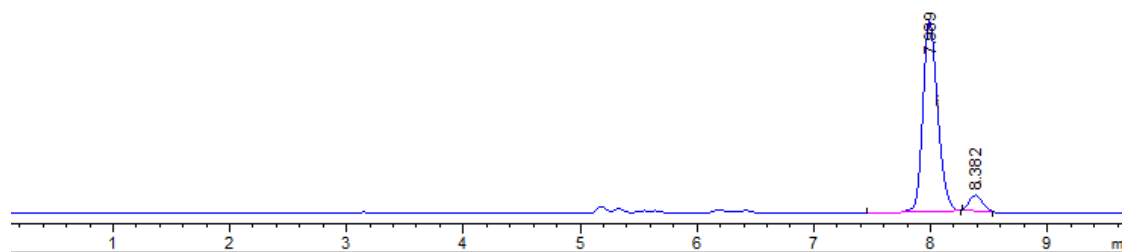

| # | [min]    | [min]  | [mAU*s]    | [mAU]     | %       |
|---|----------|--------|------------|-----------|---------|
| 1 | 7.989 MM | 0.1461 | 1908.47913 | 217.69202 | 93.3738 |
| 2 | 8.382 MM | 0.1281 | 135.43454  | 17.62702  | 6.6262  |

## 6. X-ray Crystallographic Data

**Figure 85. X-Ray Crystallographic Data for Compound(*R*)-2p**

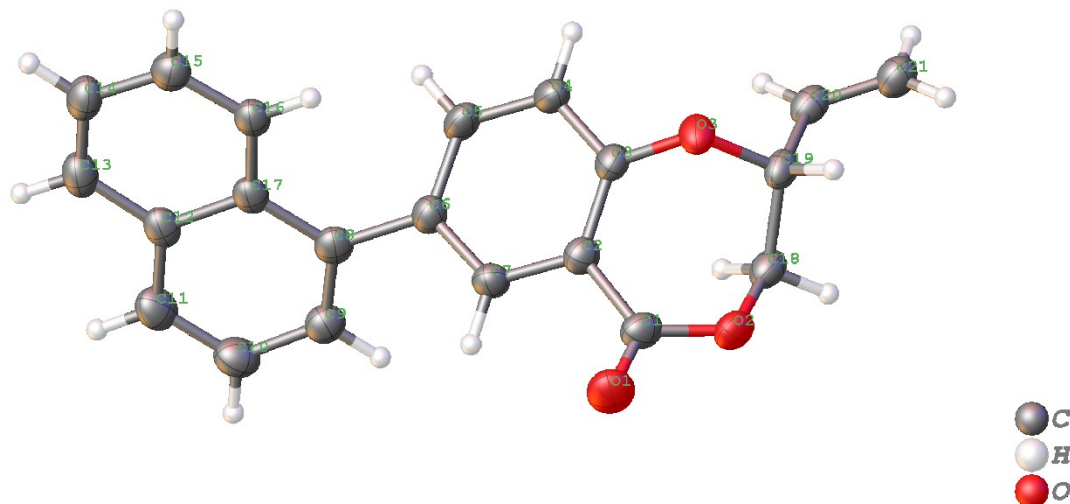

**Prob = 50**

**Method for preparing single crystal (*R*)-2p:** Dissolve 20 mg of **2p** in a sample bottle containing 1 mL of ethyl acetate, and then add 5 mL of n-hexane. The obtained solution is placed in a quiet place at room temperature. Four weeks later, the single crystal of (*R*)-**2p** was obtained.

**Structure factors have been supplied for datablock(s) (CCDC: 2294598)**

### **checkCIF/PLATON report**

Structure factors have been supplied for datablock(s) a23090201aqlq\_autored

THIS REPORT IS FOR GUIDANCE ONLY. IF USED AS PART OF A REVIEW PROCEDURE FOR

PUBLICATION, IT SHOULD NOT REPLACE THE EXPERTISE OF AN EXPERIENCED CRYSTALLOGRAPHIC REFEREE.

No syntax errors found. CIF dictionary Interpreting this report

### **Datablock: a23090201aqlq\_autored**

Bond precision: C-C = 0.0032 Å Wavelength=1.54184

Cell: a=4.5169(1) b=9.4428(2) c=18.5211(3)

alpha=90 beta=95.565(2) gamma=90

Temperature: 150 K

Calculated Reported

Volume 786.24(3) 786.24(3)

Space group P 21 P 1 21 1

Hall group P 2yb P 2yb

Moiety formula C<sub>21</sub> H<sub>16</sub> O<sub>3</sub> C<sub>21</sub> H<sub>16</sub> O<sub>3</sub>

Sum formula C<sub>21</sub> H<sub>16</sub> O<sub>3</sub> C<sub>21</sub> H<sub>16</sub> O<sub>3</sub>

Mr 316.34 316.34

Dx,g cm<sup>-3</sup> 1.336 1.336

Z 2 2

Mu (mm-1) 0.715 0.715

F000 332.0 332.0

F000' 333.02

h,k,lmax 5,11,23 5,11,23

Nref 3303[ 1755] 3170

Tmin,Tmax 0.926,0.944 0.806,1.000

Tmin' 0.924

Correction method= # Reported T Limits: Tmin=0.806 Tmax=1.000

AbsCorr = MULTI-SCAN

Data completeness= 1.81/0.96 Theta(max)= 76.123

R(reflections)= 0.0345( 3093)

wR2(reflections)=

0.0930( 3170)

S = 1.072 Npar= 217

The following ALERTS were generated. Each ALERT has the format

**test-name\_ALERT\_alert-type\_alert-level.**

Click on the hyperlinks for more details of the test.

**Alert level C**

PLAT911\_ALERT\_3\_C Missing FCF Refl Between Thmin & STh/L= 0.600 6 Report

**Alert level G**

PLAT012\_ALERT\_1\_G No \_shelx\_res\_checksum Found in CIF ..... Please Check

PLAT910\_ALERT\_3\_G Missing # of FCF Reflection(s) Below Theta(Min). 1 Note

PLAT912\_ALERT\_4\_G Missing # of FCF Reflections Above STh/L= 0.600 11 Note

PLAT933\_ALERT\_2\_G Number of HKL-OMIT Records in Embedded .res File 7 Note

PLAT978\_ALERT\_2\_G Number C-C Bonds with Positive Residual Density. 3 Info

0 **ALERT level A** = Most likely a serious problem - resolve or explain

0 **ALERT level B** = A potentially serious problem, consider carefully

1 **ALERT level C** = Check. Ensure it is not caused by an omission or oversight

5 **ALERT level G** = General information/check it is not something unexpected

1 ALERT type 1 CIF construction/syntax error, inconsistent or missing data

2 ALERT type 2 Indicator that the structure model may be wrong or deficient

2 ALERT type 3 Indicator that the structure quality may be low

1 ALERT type 4 Improvement, methodology, query or suggestion

0 ALERT type 5 Informative message, check

**Validation response form**

Please find below a validation response form (VRF) that can be filled in and pasted into your CIF.

# start Validation Reply Form

\_vrf\_PLAT911\_a23090201aqlq\_autored

;

PROBLEM: Missing FCF Refl Between Thmin & STh/L= 0.600 6 Report

RESPONSE: ...

;

# end Validation Reply Form

It is advisable to attempt to resolve as many as possible of the alerts in all categories. Often the minor

alerts point to easily fixed oversights, errors and omissions in your CIF or refinement strategy, so attention to these fine details can be worthwhile. In order to resolve some of the more serious problems

it may be necessary to carry out additional measurements or structure refinements. However, the purpose of your study may justify the reported deviations and the more serious of these should normally be commented upon in the discussion or experimental section of a paper or in the "special\_details" fields of the CIF. checkCIF was carefully designed to identify outliers and unusual parameters, but every test has its limitations and alerts that are not important in a particular case may

appear. Conversely, the absence of alerts does not guarantee there are no aspects of the results needing

attention. It is up to the individual to critically assess their own results and, if necessary, seek expert advice.

#### **Publication of your CIF in IUCr journals**

A basic structural check has been run on your CIF. These basic checks will be run on all CIFs submitted for publication in IUCr journals (*Acta Crystallographica*, *Journal of Applied Crystallography*, *Journal of Synchrotron Radiation*); however, if you intend to submit to *Acta Crystallographica Section C* or *E* or *IUCrData*, you should make sure that full publication checks are

run on the final version of your CIF prior to submission.

#### **Publication of your CIF in other journals**

Please refer to the *Notes for Authors* of the relevant journal for any special instructions relating to CIF

submission.

**PLATON version of 06/07/2023; check.def file version of 30/06/2023**
